# Supplementary material for: Assessment of viral community functional potential from viral metagenomes may be hampered by contamination with cellular sequences
Source: PubMed Central journal article supplement (PMC3877843; doi:10.1098/rsob.130160), 2013-12
Supplement: rsob130160supp1.pdf [file rsob130160supp1.pdf]

Table S1 : List of viromes and microbiomes used in this study. The web-servers hosting the datasets are: NCBI ([www.ncbi.nlm.nih.gov](http://www.ncbi.nlm.nih.gov)), MG-Rast (<http://metagenomics.anl.gov>), and Metavir (<http://metavir-meb.univ-bpclermont.fr>). Each virome and microbiome is identified by an Id. throughout the paper. When available, the methodology used to purify viral particle is indicated (CsCl : Cesium Chloride, PEG : Polyethylene Glycol, LASL : linker amplified shotgun library and MDA : phi29-mediated multiple displacement amplification).

| Virome id | Virome name                                   | Available on                      | Methodology used in sample preparation | Sample origin                  | Sample type   | Number of sequences | Mean size of sequences |
|-----------|-----------------------------------------------|-----------------------------------|----------------------------------------|--------------------------------|---------------|---------------------|------------------------|
| 12        | Medium viruses (MP1128)                       | MG-Rast – 4440427.3               | PEG – CsCL- MDA                        | Solar Salterns – California    | Hypersaline   | 39,439              | 100.43                 |
| 13        | Medium viruses (MP1116)                       | MG-Rast – 4440428.3               | PEG – CsCL- MDA                        | Solar Salterns – California    | Hypersaline   | 58,319              | 98.11                  |
| 14        | High saltern viral (HP1116)                   | MG-Rast – 4440421.3               | PEG – CsCL- MDA                        | Solar Salterns – California    | Hypersaline   | 151,180             | 99.76                  |
| 15        | Low saltern (Pond 11) viruses                 | MG-Rast – 4440436.3               | PEG – CsCL- MDA                        | Solar Salterns – California    | Hypersaline   | 268,049             | 104.47                 |
| 16        | Low saltern (Pond 11) viruses (LP1110)        | MG-Rast – 4440432.3               | PEG – CsCL- MDA                        | Solar Salterns – California    | Hypersaline   | 109,836             | 104.35                 |
| 17        | Medium saltern viruses (Pond MP1110)          | MG-Rast – 4440431.3               | PEG – CsCL- MDA                        | Solar Salterns – California    | Hypersaline   | 39,348              | 101.40                 |
| 18        | Medium saltern viruses (MP1122)               | MG-Rast – 4440417.3               | PEG – CsCL- MDA                        | Solar Salterns – California    | Hypersaline   | 55,142              | 100.79                 |
| 19        | High saltern viruses (HP1207)                 | MG-Rast – 4440145.4               | PEG – CsCL- MDA                        | Solar Salterns – California    | Hypersaline   | 46,628              | 102.15                 |
| 20        | High saltern viral (HP1128)                   | MG-Rast – 4440144.4               | PEG – CsCL- MDA                        | Solar Salterns – California    | Hypersaline   | 4,536               | 100.15                 |
| 21        | Low saltern viruses (LP1128)                  | MG-Rast – 4440420.3               | PEG – CsCL- MDA                        | Solar Salterns – California    | Hypersaline   | 62,363              | 103.87                 |
| 22        | Salton Sea Phage 1                            | MG-Rast – 4440327.3               |                                        | Salton Sea – California        | Hypersaline   | 55,467              | 103.60                 |
| 23        | Salton Sea Phage 3                            | MG-Rast – 4440328.3               |                                        | Salton Sea – California        | Hypersaline   | 29,814              | 99.20                  |
| 32        | Marine Phages GOM                             | MG-Rast – 4440304.3               | CsCL – MDA                             | Gulf of Mexico                 | Seaw ater     | 262,501             | 101.59                 |
| 33        | Marine Phages BBC                             | MG-Rast – 4440305.3               | CsCL – MDA                             | British Columbia               | Seaw ater     | 414,964             | 102.14                 |
| 34        | Marine Phages Arctic                          | MG-Rast – 4440306.3               | CsCL – MDA                             | Arctic sea                     | Seaw ater     | 686,209             | 99.15                  |
| 35        | Marine Phage SAR                              | MG-Rast – 4440322.3               | CsCL – MDA                             | Sargasso sea                   | Seaw ater     | 397,939             | 104.31                 |
| 36        | Line Islands Kingman Reef B2 phage            | MG-Rast – 4440036.3               | CsCL – MDA                             | Kingmann - Line Islands        | Seaw ater     | 93,744              | 108.34                 |
| 37        | Line Islands Christmas Reef B3 phage          | MG-Rast – 4440038.3               | CsCL – MDA                             | Christmas - Line Islands       | Seaw ater     | 279,882             | 110.56                 |
| 38        | Line Islands Palmyra F8 Phage                 | MG-Rast – 4440040.3               | CsCL – MDA                             | Palmyra - Line Islands         | Seaw ater     | 318,178             | 104.78                 |
| 39        | Line Islands Tabuaeran B1 Phage               | MG-Rast – 4440280.3               | CsCL – MDA                             | Tabuaeran - Line Islands       | Seaw ater     | 378,475             | 104.13                 |
| 40        | Tampa Bay phage from induction experiment     | MG-Rast – 4440102.3               | PEG – CsCL- MDA                        | Tampa Bay – Florida            | Seaw ater     | 279,129             | 103.95                 |
| 41        | Skan Bay Phage 1                              | MG-Rast – 4440330.3               |                                        | Skan Bay – Alaska              | Seaw ater     | 30,831              | 104.56                 |
| 46        | Tpond phage 3                                 | MG-Rast – 4440424.3               | PEG – CsCL- MDA                        | Tilapia Pond 3 – California    | Freshw ater   | 56,549              | 101.06                 |
| 47        | Healthy Tilapia pond phages                   | MG-Rast – 4440412.3               | PEG – CsCL- MDA                        | Healthy fish Pond – California | Freshw ater   | 60,135              | 101.07                 |
| 48        | Healthy Prebead tank phages                   | MG-Rast – 4440414.3               | PEG – CsCL- MDA                        | Prebead Pond – California      | Freshw ater   | 67,785              | 103.21                 |
| 49        | Tilapia pond                                  | MG-Rast – 4440439.3               | PEG – CsCL- MDA                        | Tilapia Pond – California      | Freshw ater   | 264,844             | 102.25                 |
| 57        | Porites compressa time zero viruses           | MG-Rast – 4440376.3               | CsCL – MDA                             | Porites Compressa              | Eukaryote     | 39,113              | 101.32                 |
| 58        | Porites compressa control treated viruses     | MG-Rast – 4440374.3               | CsCL – MDA                             | Porites Compressa              | Eukaryote     | 39,191              | 103.70                 |
| 59        | Porites compressa DOC treated viruses         | MG-Rast – 4440370.3               | CsCL – MDA                             | Porites Compressa              | Eukaryote     | 35,409              | 102.18                 |
| 60        | Porites compressa pH treated viruses          | MG-Rast – 4440371.3               | CsCL – MDA                             | Porites Compressa              | Eukaryote     | 49,949              | 104.73                 |
| 61        | Porites compressa nutrient treated viruses    | MG-Rast – 4440377.3               | CsCL – MDA                             | Porites Compressa              | Eukaryote     | 34,139              | 107.18                 |
| 62        | Porites compressa temperature treated viruses | MG-Rast – 4440375.3               | CsCL – MDA                             | Porites Compressa              | Eukaryote     | 38,482              | 113.38                 |
| 66        | Pozas Azules Stromatolites phages             | MG-Rast – 4440320.3               | CsCL – MDA                             | Paztac Azules                  | Microbialites | 301,264             | 104.64                 |
| 67        | Rios Mesquites Stromatolites phages           | MG-Rast – 4440321.3               | CsCL – MDA                             | Rio Mesquites                  | Microbialites | 324,500             | 104.22                 |
| 68        | Highborne Cay Stromatolite phage              | MG-Rast – 4440323.3               | CsCL – MDA                             | Bahamas                        | Microbialites | 148,334             | 100.52                 |
| 73        | Healthy slime viruses                         | MG-Rast – 4440065.3               |                                        | Healthy fish gut               | Eukaryote     | 61,022              | 98.45                  |
| 74        | Morbid slime viruses                          | MG-Rast – 4440064.3               |                                        | Morbid fish gut                | Eukaryote     | 59,599              | 98.32                  |
| 83        | CF Lung Sputum Viruses                        | MG-Rast – 4440441.3               | CsCL – MDA                             | Human Lung (USA)               | Eukaryote     | 92,223              | 80.71                  |
| 84        | Health Lung Sputum Viruses                    | MG-Rast – 4440442.4               | CsCL – MDA                             | Human Lung (USA)               | Eukaryote     | 39,489              | 84.80                  |
| 85        | Mosquito DNA 1                                | MG-Rast – 4440052.3               | CsCL – MDA                             | Mosquito (USA)                 | Eukaryote     | 336,760             | 102.61                 |
| 86        | Mosquito DNA 2                                | MG-Rast – 4440053.3               | CsCL – MDA                             | Mosquito (USA)                 | Eukaryote     | 638,689             | 100.32                 |
| 87        | Mosquito DNA 3                                | MG-Rast – 4440054.3               | CsCL – MDA                             | Mosquito (USA)                 | Eukaryote     | 601,040             | 104.16                 |
| AISp      | Lake Limmopolar Spring                        | Metavir – Project Lake Limmopolar | Sucrose cushion – MDA                  | Lake Limmopolar                | Freshw ater   | 41,322              | 239.65                 |
| AISu      | Lake Limmopolar Summer                        | Metavir – Project Lake Limmopolar | Sucrose cushion – MDA                  | Lake Limmopolar                | Freshw ater   | 38,475              | 221.27                 |
| MET6      | Lake Pavin                                    | Metavir – Project French Lakes    | PEG – MDA                              | Lake Pavin – France            | Freshw ater   | 649,290             | 412.31                 |
| MET7      | Lake Bourget                                  | Metavir – Project French Lakes    | PEG – MDA                              | Lake Bourget – France          | Freshw ater   | 593,084             | 433.41                 |
| SRRO43421 | Human Gut L1 8                                | Metavir – Project Human Gut Diet  | CsCL – MDA                             | Human Gut (USA) – X1           | Eukaryote     | 30,873              | 372.90                 |
| SRRO43422 | Human Gut L2 1                                | Metavir – Project Human Gut Diet  | CsCL – MDA                             | Human Gut (USA) – L1           | Eukaryote     | 132,569             | 379.12                 |
| SRRO43423 | Human Gut L2 7                                | Metavir – Project Human Gut Diet  | CsCL – MDA                             | Human Gut (USA) – L2           | Eukaryote     | 61,104              | 370.82                 |
| SRRO43424 | Human Gut L2 8                                | Metavir – Project Human Gut Diet  | CsCL – MDA                             | Human Gut (USA) – L2           | Eukaryote     | 148,781             | 370.31                 |
| SRRO43425 | Human Gut H1 7                                | Metavir – Project Human Gut Diet  | CsCL – MDA                             | Human Gut (USA) – L2           | Eukaryote     | 16,955              | 375.02                 |
| SRRO43426 | Human Gut H1 8                                | Metavir – Project Human Gut Diet  | CsCL – MDA                             | Human Gut (USA) – H1           | Eukaryote     | 13,048              | 378.90                 |
| SRRO43427 | Human Gut H2 8                                | Metavir – Project Human Gut Diet  | CsCL – MDA                             | Human Gut (USA) – H1           | Eukaryote     | 16,747              | 365.41                 |
| SRRO43428 | Human Gut L1 1                                | Metavir – Project Human Gut Diet  | CsCL – MDA                             | Human Gut (USA) – H2           | Eukaryote     | 16,137              | 366.71                 |
| SRRO43430 | Human Gut H1 2                                | Metavir – Project Human Gut Diet  | CsCL – MDA                             | Human Gut (USA) – L1           | Eukaryote     | 107,259             | 405.06                 |
| SRRO43431 | Human Gut H1 1                                | Metavir – Project Human Gut Diet  | CsCL – MDA                             | Human Gut (USA) – H1           | Eukaryote     | 107,993             | 409.48                 |
| SRRO43432 | Human Gut H2 1                                | Metavir – Project Human Gut Diet  | CsCL – MDA                             | Human Gut (USA) – H1           | Eukaryote     | 25,648              | 377.67                 |
| SRRO43433 | Human Gut L3 1                                | Metavir – Project Human Gut Diet  | CsCL – MDA                             | Human Gut (USA) – H2           | Eukaryote     | 23,614              | 372.91                 |
| SRRO43434 | Human Gut L3 2                                | Metavir – Project Human Gut Diet  | CsCL – MDA                             | Human Gut (USA) – L3           | Eukaryote     | 33,489              | 369.66                 |
| SRRO43435 | Human Gut L3 7                                | Metavir – Project Human Gut Diet  | CsCL – MDA                             | Human Gut (USA) – L3           | Eukaryote     | 76,090              | 384.09                 |
| SRRO43436 | Human Gut L3 8                                | Metavir – Project Human Gut Diet  | CsCL – MDA                             | Human Gut (USA) – L3           | Eukaryote     | 15,166              | 382.16                 |
| SRRO43437 | Human Gut F-A                                 | Metavir – Project Human Gut Diet  | CsCL – MDA                             | Human Gut (USA) – L3           | Eukaryote     | 59,155              | 382.72                 |
| SRRO89800 | Human Gut F-B                                 | Metavir – Project Human Feces     | CsCL – MDA                             | Human Gut (South Korea)        | Eukaryote     | 113,054             | 431.05                 |
| SRRO89802 | Human Gut F-C                                 | Metavir – Project Human Feces     | CsCL – MDA                             | Human Gut (South Korea)        | Eukaryote     | 109,569             | 435.21                 |
| SRRO89803 | Human Gut F-D                                 | Metavir – Project Human Feces     | CsCL – MDA                             | Human Gut (South Korea)        | Eukaryote     | 68,391              | 437.07                 |
| SRRO89804 | Human Gut F-E                                 | Metavir – Project Human Feces     | CsCL – MDA                             | Human Gut (South Korea)        | Eukaryote     | 115,121             | 433.08                 |
| SRRO89805 | Human Gut Unknow n                            | Metavir – Project Human Feces     | CsCL – MDA                             | Human Gut (South Korea)        | Eukaryote     | 98,511              | 417.05                 |

Table S2 : **rDNA ratios, Microbial hit ratio (MHR) and prophage hit ratio (PHR) for each metagenome**, with the different data used to calculate these ratios (total number of sequences, number of 16S and 23S rDNA detected, number of sequences with a microbial hits, number of microbial hits within a prophage-like region). rDNA ratios are colored as in Figure 1, *i.e.* green for 0, orange for 0 to 2 ‰, and red for more than 2‰. MHR are highlighted in blue when lower than 5%. PHR are highlighted in red when lower than 10% and in green when greater than 25%.

| Virome Id | Name                                          | Biome         | Total number of sequences | Number of 16S rDNA detected | Number of 23S rDNA detected | rDNA % <sub>seq</sub> | Total number of hits with prokaryote genomes | Number of hits in prophage-like region | Number of hits in non-prophage region | Microbial Hit Ratio | Prophage Hit Ratio |
|-----------|-----------------------------------------------|---------------|---------------------------|-----------------------------|-----------------------------|-----------------------|----------------------------------------------|----------------------------------------|---------------------------------------|---------------------|--------------------|
| 12        | Medium viruses (MP1128)                       | Hypersaline   | 39 439                    | 1                           | 2                           | 0.76                  | 360                                          | 198                                    | 162                                   | 0.91%               | 55.00%             |
| 13        | Medium viruses (MP1116)                       | Hypersaline   | 58 319                    | 11                          | 32                          | 7.37                  | 1 621                                        | 345                                    | 1 276                                 | 2.78%               | 21.2%              |
| 14        | High saltern viral (HP1116)                   | Hypersaline   | 151 180                   | 3                           | 3                           | 0.40                  | 3 520                                        | 1 623                                  | 1 897                                 | 2.33%               | 46.11%             |
| 15        | Low saltern (Pond 11) viruses                 | Hypersaline   | 268 049                   | 9                           | 21                          | 1.12                  | 6 847                                        | 3 374                                  | 3 473                                 | 2.55%               | 49.28%             |
| 16        | Low saltern (Pond 11) viruses (LP1110)        | Hypersaline   | 109 836                   | 0                           | 1                           | 0.09                  | 2 239                                        | 1 195                                  | 1 044                                 | 2.04%               | 53.37%             |
| 17        | Medium saltern viruses (Pond MP1110)          | Hypersaline   | 39 348                    | 0                           | 0                           | 0.00                  | 893                                          | 463                                    | 430                                   | 2.27%               | 51.85%             |
| 18        | Medium saltern viruses (MP1122)               | Hypersaline   | 55 142                    | 0                           | 0                           | 0.54                  | 865                                          | 513                                    | 352                                   | 1.57%               | 59.31%             |
| 19        | High saltern viruses (HP1207)                 | Hypersaline   | 46 628                    | 5                           | 4                           | 1.93                  | 2 606                                        | 274                                    | 2 332                                 | 5.59%               | 10.51%             |
| 20        | High saltern viral (HP1128)                   | Hypersaline   | 4 536                     | 2                           | 22                          | 52.91                 | 752                                          | 98                                     | 654                                   | 16.58%              | 13.03%             |
| 21        | Low saltern viruses (LP1128)                  | Hypersaline   | 62 363                    | 63                          | 112                         | 28.06                 | 10 517                                       | 997                                    | 9 520                                 | 16.86%              | 9.48%              |
| 22        | Salton Sea Phase 1                            | Hypersaline   | 55 467                    | 0                           | 0                           | 0.00                  | 959                                          | 546                                    | 413                                   | 1.73%               | 56.93%             |
| 23        | Salton Sea Phase 3                            | Hypersaline   | 29 814                    | 0                           | 0                           | 0.00                  | 464                                          | 242                                    | 222                                   | 1.56%               | 52.16%             |
| 32        | Marine Phages GOM                             | Seawater      | 262 501                   | 29                          | 50                          | 3.01                  | 30 214                                       | 2 789                                  | 27 425                                | 11.51%              | 9.23%              |
| 33        | Marine Phages BBC                             | Seawater      | 414 964                   | 27                          | 61                          | 2.12                  | 21 048                                       | 3 762                                  | 17 286                                | 5.07%               | 17.87%             |
| 34        | Marine Phages Arctic                          | Seawater      | 686 209                   | 162                         | 231                         | 5.73                  | 202 106                                      | 12 698                                 | 189 208                               | 29.45%              | 6.38%              |
| 35        | Marine Phage SAR                              | Seawater      | 397 939                   | 7                           | 18                          | 0.63                  | 7 539                                        | 2 211                                  | 5 328                                 | 1.89%               | 29.33%             |
| 36        | Line Islands Kingman Reef B2 phage            | Seawater      | 97 744                    | 0                           | 8                           | 0.85                  | 5 477                                        | 513                                    | 4 964                                 | 5.84%               | 9.37%              |
| 37        | Line Islands Christmas Reef B3 phage          | Seawater      | 279 892                   | 52                          | 103                         | 5.54                  | 63 629                                       | 2 869                                  | 60 760                                | 22.73%              | 4.51%              |
| 38        | Line Islands Palmyra F8 Phage                 | Seawater      | 318 178                   | 0                           | 13                          | 0.41                  | 4 079                                        | 1 273                                  | 2 806                                 | 1.26%               | 31.21%             |
| 39        | Line Islands Tabuaeran B1 Phage               | Seawater      | 378 475                   | 0                           | 0                           | 0.00                  | 1 453                                        | 1 289                                  | 3 244                                 | 1.20%               | 28.44%             |
| 40        | Tampa Bay phage from induction experiment     | Seawater      | 279 129                   | 0                           | 0                           | 0.00                  | 5 080                                        | 2 476                                  | 2 604                                 | 1.82%               | 48.74%             |
| 41        | Skau Bay Phage 1                              | Seawater      | 30 831                    | 0                           | 0                           | 0.00                  | 476                                          | 209                                    | 267                                   | 1.54%               | 43.91%             |
| 46        | Tpond phase 3                                 | Freshwater    | 58 549                    | 0                           | 6                           | 1.06                  | 1 274                                        | 810                                    | 464                                   | 2.25%               | 63.58%             |
| 47        | Healthy Tilapia pond phages                   | Freshwater    | 60 135                    | 2                           | 0                           | 0.33                  | 1 352                                        | 853                                    | 499                                   | 2.25%               | 63.09%             |
| 48        | Healthy Prebead tank phages                   | Freshwater    | 67 785                    | 2                           | 5                           | 1.03                  | 2 058                                        | 1 377                                  | 681                                   | 3.04%               | 66.91%             |
| 49        | Tilapia pond                                  | Freshwater    | 264 844                   | 2                           | 9                           | 0.42                  | 9 674                                        | 5 999                                  | 3 675                                 | 3.65%               | 62.01%             |
| 57        | Porites compressa time zero viruses           | Coral         | 39 113                    | 2                           | 10                          | 3.07                  | 2412                                         | 207                                    | 2 205                                 | 6.17%               | 8.58%              |
| 58        | Porites compressa control treated viruses     | Coral         | 39 191                    | 144                         | 33                          | 45.16                 | 6191                                         | 792                                    | 5 399                                 | 15.80%              | 12.79%             |
| 59        | Porites compressa DOC treated viruses         | Coral         | 35 409                    | 18                          | 52                          | 19.77                 | 2126                                         | 334                                    | 1 792                                 | 6.00%               | 15.71%             |
| 60        | Porites compressa pH treated viruses          | Coral         | 49 949                    | 2                           | 31                          | 6.61                  | 2505                                         | 386                                    | 2 119                                 | 5.02%               | 15.41%             |
| 61        | Porites compressa nutrient treated viruses    | Coral         | 34 139                    | 1                           | 20                          | 6.15                  | 2639                                         | 376                                    | 2 263                                 | 7.73%               | 14.25%             |
| 62        | Porites compressa temperature treated viruses | Coral         | 38 482                    | 16                          | 38                          | 14.03                 | 1 911                                        | 196                                    | 1 715                                 | 4.97%               | 10.26%             |
| 66        | Pozas Azules Stromatolites phages             | Microbialites | 301 264                   | 4                           | 7                           | 0.37                  | 4 381                                        | 1 592                                  | 2 789                                 | 1.45%               | 36.51%             |
| 67        | Ros Mesquites Stromatolites phages            | Microbialites | 324 500                   | 4                           | 8                           | 0.37                  | 11 968                                       | 1 058                                  | 1 808                                 | 3.69%               | 84.89%             |
| 68        | Highborne Cay Stromatolite phage              | Microbialites | 148 334                   | 0                           | 0                           | 0.00                  | 466                                          | 184                                    | 282                                   | 0.31%               | 39.48%             |
| 73        | Healthy slime viruses                         | Fish          | 61 022                    | 22                          | 89                          | 18.19                 | 12 924                                       | 877                                    | 12 047                                | 21.18%              | 6.79%              |
| 74        | Morbid slime viruses                          | Fish          | 59 599                    | 25                          | 82                          | 17.95                 | 20 446                                       | 1 194                                  | 19 252                                | 34.31%              | 5.84%              |
| 83        | CF Lung Sputum Viruses                        | Human Lung    | 92 223                    | 6                           | 10                          | 1.73                  | 1 331                                        | 129                                    | 1 202                                 | 1.44%               | 9.69%              |
| 84        | Health Lung Sputum Virus                      | Human Lung    | 39 489                    | 0                           | 3                           | 0.76                  | 292                                          | 24                                     | 268                                   | 0.74%               | 8.22%              |
| 85        | Mosquito DNA 1                                | Mosquito      | 336 760                   | 61                          | 63                          | 3.68                  | 87 878                                       | 18 256                                 | 69 622                                | 26.10%              | 20.77%             |
| 86        | Mosquito DNA 2                                | Mosquito      | 638 689                   | 133                         | 114                         | 3.87                  | 257 424                                      | 19 480                                 | 237 944                               | 40.31%              | 7.57%              |
| 87        | Mosquito DNA 3                                | Mosquito      | 601 040                   | 162                         | 228                         | 6.49                  | 178 516                                      | 20 504                                 | 158 012                               | 11.49%              |                    |
| AI5p      | Lake Limnopolis Spring                        | Freshwater    | 41 322                    | 0                           | 2                           | 0.48                  | 640                                          | 311                                    | 329                                   | 0.24%               | 29.00%             |
| AI5u      | Lake Limnopolis Summer                        | Freshwater    | 38 475                    | 1                           | 2                           | 0.78                  | 4 457                                        | 786                                    | 3 671                                 | 3.14%               | 11.52%             |
| ME16      | Lake Pavin                                    | Freshwater    | 649 290                   | 0                           | 0                           | 0.00                  | 41 460                                       | 25 795                                 | 15 665                                | 0.26%               | 62.42%             |
| ME17      | Lake Bourget                                  | Freshwater    | 593 084                   | 0                           | 0                           | 0.00                  | 96 717                                       | 58 217                                 | 38 500                                | 0.62%               | 54.42%             |
| SRRO43421 | Human Gut L1 8                                | Human gut     | 30 873                    | 4                           | 8                           | 3.89                  | 14 767                                       | 5 859                                  | 8 908                                 | 15.77%              | 23.63%             |
| SRRO43422 | Human Gut L2 1                                | Human gut     | 132 569                   | 13                          | 12                          | 1.89                  | 21 405                                       | 14 266                                 | 7 139                                 | 2.83%               | 60.41%             |
| SRRO43423 | Human Gut L2 7                                | Human gut     | 61 104                    | 1                           | 2                           | 0.69                  | 6 069                                        | 3 203                                  | 2 866                                 | 1.47%               | 52.73%             |
| SRRO43424 | Human Gut L2 8                                | Human gut     | 148 781                   | 8                           | 9                           | 1.14                  | 35 356                                       | 22 808                                 | 12 548                                | 2.02%               | 58.79%             |
| SRRO43425 | Human Gut H1 7                                | Human gut     | 16 955                    | 1                           | 2                           | 1.77                  | 3 692                                        | 2 247                                  | 1 445                                 | 2.11%               | 57.98%             |
| SRRO43426 | Human Gut H1 8                                | Human gut     | 13 048                    | 0                           | 1                           | 0.77                  | 5 298                                        | 3 524                                  | 1 774                                 | 3.56%               | 56.34%             |
| SRRO43427 | Human Gut H2 8                                | Human gut     | 16 747                    | 0                           | 1                           | 0.60                  | 4 763                                        | 3 083                                  | 1 680                                 | 2.97%               | 58.43%             |
| SRRO43428 | Human Gut L1 1                                | Human gut     | 16 137                    | 0                           | 1                           | 0.62                  | 3 429                                        | 2 247                                  | 1 182                                 | 2.21%               | 60.78%             |
| SRRO43430 | Human Gut H1 2                                | Human gut     | 107 259                   | 2                           | 12                          | 1.31                  | 39 254                                       | 27 821                                 | 11 433                                | 3.70%               | 55.44%             |
| SRRO43431 | Human Gut H1 1                                | Human gut     | 107 993                   | 3                           | 3                           | 0.56                  | 34 802                                       | 24 199                                 | 10 603                                | 3.02%               | 65.28%             |
| SRRO43432 | Human Gut H2 1                                | Human gut     | 25 648                    | 0                           | 2                           | 0.78                  | 5 999                                        | 3 731                                  | 2 268                                 | 2.64%               | 42.18%             |
| SRRO43433 | Human Gut L3 1                                | Human gut     | 23 614                    | 0                           | 1                           | 0.42                  | 2 785                                        | 2 027                                  | 758                                   | 1.58%               | 70.43%             |
| SRRO43434 | Human Gut L3 2                                | Human gut     | 33 489                    | 1                           | 0                           | 0.30                  | 4 785                                        | 3 281                                  | 1 504                                 | 1.59%               | 56.87%             |
| SRRO43435 | Human Gut L3 7                                | Human gut     | 76 090                    | 3                           | 8                           | 1.45                  | 14 467                                       | 7 963                                  | 6 504                                 | 3.74%               | 29.84%             |
| SRRO43436 | Human Gut L3 8                                | Human gut     | 15 166                    | 1                           | 0                           | 0.66                  | 2 722                                        | 1 661                                  | 1 061                                 | 2.29%               | 42.36%             |
| SRRO43437 | Human Gut F-A                                 | Human gut     | 59 155                    | 2                           | 5                           | 1.18                  | 10 975                                       | 6 311                                  | 4 664                                 | 4.41%               | 34.28%             |
| SRRO89800 | Human Gut F-B                                 | Human gut     | 113 054                   | 9                           | 0                           | 0.80                  | 6 308                                        | 3 504                                  | 2 804                                 | 0.25%               | 59.44%             |
| SRRO89802 | Human Gut F-C                                 | Human gut     | 109 569                   | 3                           | 1                           | 0.37                  | 11 199                                       | 5 706                                  | 5 493                                 | 0.88%               | 63.88%             |
| SRRO89803 | Human Gut F-D                                 | Human gut     | 68 391                    | 0                           | 3                           | 0.44                  | 8 597                                        | 5 614                                  | 2 983                                 | 0.55%               | 61.66%             |
| SRRO89804 | Human Gut F-E                                 | Human gut     | 115 121                   | 1                           | 3                           | 0.35                  | 9 733                                        | 5 397                                  | 4 336                                 | 0.91%               | 34.45%             |
| SRRO89805 | Human Gut Unknown                             | Human gut     | 98 511                    | 9                           | 5                           | 1.42                  | 5 481                                        | 3 384                                  | 2 097                                 | 0.45%               | 50.91%             |

  

| Microbiome Id | Name                                           | Biome         | Total number of sequences | Number of 16S rDNA detected | Number of 23S rDNA detected | rDNA % <sub>seq</sub> | Total number of hits for 10 000 reads | Number of hits in prophage-like region | Number of hits in non-prophage region | Microbial Hit Ratio | Prophage Hit Ratio |
|---------------|------------------------------------------------|---------------|---------------------------|-----------------------------|-----------------------------|-----------------------|---------------------------------------|----------------------------------------|---------------------------------------|---------------------|--------------------|
| 1             | Soudan Red Stuff                               | Subterranean  | 334 386                   | 236                         | 642                         | 26.26                 | 1 230                                 | 103                                    | 1 127                                 | 12.30%              | 8.37%              |
| 2             | Soudan Black Stuff                             | Subterranean  | 388 627                   | 19                          | 23                          | 1.08                  | 219                                   | 21                                     | 198                                   | 2.19%               | 9.59%              |
| 3             | Low saltern microbes (Pond 11)                 | Hypersaline   | 268 206                   | 196                         | 359                         | 20.89                 | 1 425                                 | 83                                     | 1 342                                 | 14.25%              | 5.82%              |
| 4             | Medium saltern microbes (MB1110)               | Hypersaline   | 38 929                    | 43                          | 71                          | 29.28                 | 1 882                                 | 130                                    | 1 752                                 | 18.82%              | 6.91%              |
| 5             | Medium saltern microbes (MB1111)               | Hypersaline   | 23 261                    | 37                          | 48                          | 36.54                 | 1 938                                 | 118                                    | 1 820                                 | 19.38%              | 6.09%              |
| 6             | Low saltern pond plasmids (TT)                 | Hypersaline   | 111 431                   | 117                         | 179                         | 26.56                 | 1 205                                 | 70                                     | 1 135                                 | 12.05%              | 5.81%              |
| 7             | Medium saltern microbial (MB1128)              | Hypersaline   | 8 062                     | 5                           | 12                          | 21.09                 | 508                                   | 33                                     | 475                                   | 6.30%               | 6.50%              |
| 8             | High saltern microbial (HB1128)                | Hypersaline   | 35 446                    | 14                          | 41                          | 15.52                 | 2 321                                 | 188                                    | 2 133                                 | 23.21%              | 8.10%              |
| 9             | Salton Sea Bacteria 1                          | Hypersaline   | 178 407                   | 47                          | 80                          | 7.12                  | 716                                   | 55                                     | 661                                   | 7.16%               | 7.68%              |
| 10            | Medium salinity microbial (MB1116)             | Hypersaline   | 120 987                   | 134                         | 221                         | 29.34                 | 2 171                                 | 167                                    | 2 004                                 | 21.71%              | 7.69%              |
| 11            | Low salinity microbial (LB1128)                | Hypersaline   | 34 296                    | 27                          | 41                          | 19.83                 | 595                                   | 28                                     | 567                                   | 5.95%               | 4.71%              |
| 24            | Line Islands Kingman Reef B2 bacteria          | Marine        | 188 445                   | 11                          | 23                          | 1.80                  | 334                                   | 15                                     | 319                                   | 3.34%               | 4.49%              |
| 25            | Line Islands Christmas Reef B3 bacteria        | Marine        | 227 542                   | 18                          | 42                          | 2.64                  | 192                                   | 14                                     | 178                                   | 1.92%               | 7.29%              |
| 26            | Line Islands Palmyra F8 Bacteria               | Marine        | 289 723                   | 35                          | 102                         | 4.73                  | 604                                   | 49                                     | 555                                   | 6.04%               | 8.11%              |
| 27            | Line Islands Tabuaeran B1 Bacteria             | Marine        | 290 844                   | 4                           | 48                          | 1.79                  | 200                                   | 28                                     | 172                                   | 2.00%               | 14.00%             |
| 28            | DNISP 1 (MAM.1)                                | Marine        | 54 848                    | 84                          | 88                          | 31.36                 | 1 513                                 | 84                                     | 1 429                                 | 15.13%              | 5.55%              |
| 29            | DNISP 2 (MAM.2)                                | Marine        | 50 313                    | 88                          | 112                         | 39.75                 | 962                                   | 53                                     | 909                                   | 9.62%               | 5.51%              |
| 30            | VAN 1 (MAM.3)                                  | Marine        | 12 446                    | 17                          | 19                          | 28.92                 | 908                                   | 67                                     | 841                                   | 9.08%               | 7.38%              |
| 31            | VAN 2 (MAM.4)                                  | Marine        | 33 773                    | 39                          | 81                          | 35.53                 | 1 317                                 | 91                                     | 1 226                                 | 13.17%              | 6.91%              |
| 42            | Tilapia pond microbes                          | Freshwater    | 381 076                   | 130                         | 325                         | 11.94                 | 1 265                                 | 107                                    | 1 158                                 | 12.65%              | 8.46%              |
| 43            | Healthy Tilapia pond microbes                  | Freshwater    | 63 978                    | 46                          | 77                          | 19.23                 | 1 143                                 | 92                                     | 1 051                                 | 11.43%              | 8.05%              |
| 44            | Healthy Prebead tank microbes                  | Freshwater    | 44 094                    | 25                          | 51                          | 17.24                 | 1 368                                 | 107                                    | 1 261                                 | 13.68%              | 7.82%              |
| 45            | Tpond microbes 3                               | Freshwater    | 67 612                    | 62                          | 122                         | 27.21                 | 1 294                                 | 89                                     | 1 205                                 | 12.94%              | 6.88%              |
| 50            | Porites compressa time zero bacteria           | Coral         | 53 473                    | 2                           | 17                          | 3.55                  | 200                                   | 144                                    | 124                                   | 14.44%              | 13.89%             |
| 51            | Porites compressa control treated bacteria     | Coral         | 65 191                    | 4                           | 19                          | 3.53                  | 111                                   | 14                                     | 97                                    | 1.11%               | 12.61%             |
| 52            | Porites compressa temperature treated bacteria | Coral         | 61 356                    | 17                          | 18                          | 5.70                  | 91                                    | 15                                     | 76                                    | 0.91%               | 16.48%             |
| 53            | Porites compressa DOC treated microbes         | Coral         | 62 959                    | 9                           | 23                          | 5.08                  | 82                                    | 13                                     | 69                                    | 0.82%               | 15.85%             |
| 54            | Porites compressa pH treated microbes          | Coral         | 67 994                    | 21                          | 31                          | 7.65                  | 108                                   | 14                                     | 94                                    | 1.08%               | 12.96%             |
| 55            | Porites compressa nutrient treated microbes    | Coral         | 65 008                    | 13                          | 46                          | 9.08                  | 200                                   | 27                                     | 173                                   | 2.00%               | 13.50%             |
| 56            | Porites astreoides microbial extraction        | Coral         | 316 279                   | 348                         | 952                         | 41.10                 | 232                                   | 13                                     | 219                                   | 2.32%               | 5.60%              |
| 63            | Ros Mesquites Stromatolites bacteria           | Microbialites | 124 694                   | 11                          | 16                          | 2.17                  | 1 881                                 | 82                                     | 1 799                                 | 18.81%              | 4.36%              |
| 64            | Highborne Cay stromatolite bacteria            | Microbialites | 257 573                   | 7                           | 2                           | 0.35                  | 102                                   | 52                                     | 50                                    | 1.02%               | 50.98%             |
| 65            | Pozas Azules Stromatolite microbes             | Microbialites | 326 146                   | 45                          | 130                         | 5.37                  | 833                                   | 75                                     | 758                                   | 8.33%               | 9.00%              |
| 69            | Healthy slime bacteria                         | Fish          | 66 066                    | 53                          | 165                         | 33.00                 | 2 442                                 | 167                                    | 2 275                                 | 24.42%              | 6.84%              |
| 70            | Morbid slime bacteria                          | Fish          | 82 442                    | 105                         | 345                         | 54.58                 | 2 701                                 | 194                                    | 2 507                                 | 27.01%              | 7.18%              |
| 71            | Healthy gut bacteria                           | Fish          | 51 498                    | 48                          | 144                         | 37.28                 | 3 752                                 | 181                                    | 3 571                                 | 37.52%              | 4.82%              |
| 72            | Morbid gut bacteria                            | Fish          | 60 311                    | 65                          | 229                         | 48.75                 | 3 696                                 | 459                                    | 3 237                                 | 36.96%              | 12.42%             |
| 75            | Poiled Planktonic                              | Cow rumen     | 236 830                   | 292                         | 502                         | 33.53                 | 1 596                                 | 155                                    | 1 441                                 | 15.96%              | 9.71%              |
| 76            | 80F6                                           | Cow rumen     | 178 713                   | 224                         | 398                         | 34.80                 | 1 754                                 | 166                                    | 1 588                                 | 17.54%              | 9.46%              |
| 77            | 640F6                                          | Cow rumen     | 264 849                   | 345                         | 554                         | 33.94                 | 1 374                                 |                                        |                                       |                     |                    |

Table S3 : **Table of virome-genome association** where more than 500 reads from the virome were found to be similar to a non-prophage region of the genome. For each virome-genome pair, the number of reads with a hit is indicated, as well as the evaluation of the scattering of the reads from a recruitment plot (X : near complete coverage of the genome, - : coverage restricted to specific regions, ? : too few hits to assess), the percentage and number of genes covered by virome reads, and the presence of a GTA cluster in the genome,. Virome are colored as in Fig 1. All recruitment plots are available on [http://metavir-meb.univ-bpclermont.fr/Recruitment\\_plots/recruitment\\_plot\\_gallery.php](http://metavir-meb.univ-bpclermont.fr/Recruitment_plots/recruitment_plot_gallery.php)

| Genome    | Virome    | Biome      | Hit number | Cover – Plot | % Gene | Nb Genes | GTA |
|-----------|-----------|------------|------------|--------------|--------|----------|-----|
| vok       | MET7      | Freshwater | 1744       | -            | 1.02   | 978      | -   |
| ajs       | SRR089804 | Eukaryote  | 2055       | -            | 0.07   | 4383     | -   |
| pub       | 36        | Marine     | 1973       | X            | 56.23  | 1389     | -   |
| amc       | 21        | Marine     | 1085       | X            | 19.27  | 4146     | -   |
| sal       | 32        | Marine     | 12435      | X            | 70.71  | 3260     | X   |
| mlo       | 32        | Marine     | 2028       | X            | 16.38  | 7333     | -   |
| sal       | 33        | Marine     | 6335       | X            | 60.40  | 3260     | X   |
| mlo       | 33        | Marine     | 1592       | X            | 14.17  | 7333     | -   |
| sal       | 34        | Marine     | 91315      | X            | 79.82  | 3260     | X   |
| mlo       | 34        | Marine     | 11602      | X            | 33.68  | 7333     | -   |
| nar.pNL1  | 34        | Marine     | 5954       | X            | 47.59  | 187      | X   |
| eli       | 34        | Marine     | 5647       | X            | 14.78  | 3059     | X   |
| nar       | 34        | Marine     | 4203       | X            | 15.88  | 4031     | X   |
| swi       | 34        | Marine     | 3981       | X            | 14.12  | 5455     | -   |
| mes       | 34        | Marine     | 3715       | X            | 27.80  | 4684     | -   |
| hdn       | 34        | Marine     | 2186       | X            | 27.06  | 3600     | -   |
| pub       | 37        | Marine     | 34799      | X            | 91.36  | 1389     | -   |
| hse       | 73        | Eukaryote  | 7162       | X            | 47.17  | 4804     | -   |
| hse       | 74        | Eukaryote  | 10548      | X            | 55.25  | 4804     | -   |
| sbp       | 85        | Eukaryote  | 19568      | X            | 69.48  | 4666     | -   |
| sbn       | 85        | Eukaryote  | 10004      | X            | 52.83  | 4859     | -   |
| shw       | 85        | Eukaryote  | 5748       | X            | 40.60  | 4217     | -   |
| sbm       | 85        | Eukaryote  | 5730       | X            | 39.06  | 4596     | -   |
| son       | 85        | Eukaryote  | 1821       | ?            | 9.80   | 4745     | -   |
| spe       | 86        | Eukaryote  | 54182      | X            | 65.50  | 5064     | -   |
| ssn       | 86        | Eukaryote  | 15864      | -            | 5.81   | 4804     | -   |
| pak       | 86        | Eukaryote  | 12868      | ?            | 33.36  | 4956     | -   |
| sbc       | 86        | Eukaryote  | 9600       | -            | 0.39   | 5323     | -   |
| pau       | 86        | Eukaryote  | 9345       | -            | 21.67  | 5977     | -   |
| ecj       | 86        | Eukaryote  | 9224       | -            | 0.89   | 4494     | -   |
| sdj       | 86        | Eukaryote  | 8047       | -            | 0.80   | 4892     | -   |
| cpi       | 86        | Eukaryote  | 6076       | X            | 15.62  | 7399     | -   |
| mpo       | 86        | Eukaryote  | 5237       | ?            | 11.22  | 5546     | X   |
| ecr       | 86        | Eukaryote  | 3371       | -            | 0.24   | 4635     | -   |
| ypy       | 86        | Eukaryote  | 3365       | X            | 21.26  | 4313     | -   |
| mea       | 86        | Eukaryote  | 2559       | -            | 7.63   | 6345     | X   |
| sty.pHCM1 | 86        | Eukaryote  | 2539       | -            | 2.85   | 246      | -   |
| yen       | 86        | Eukaryote  | 2227       | ?            | 17.57  | 4280     | -   |
| pap       | 86        | Eukaryote  | 1909       | -            | 9.73   | 6369     | -   |
| swi       | 86        | Eukaryote  | 1762       | -            | 6.58   | 5455     | -   |
| pac       | 86        | Eukaryote  | 1675       | -            | 16.09  | 2368     | -   |
| mdi       | 86        | Eukaryote  | 1665       | -            | 4.46   | 6030     | X   |
| dia       | 86        | Eukaryote  | 1660       | ?            | 7.20   | 3609     | -   |
| sjp.1     | 86        | Eukaryote  | 1530       | ?            | 8.63   | 4461     | X   |
| pak       | 87        | Eukaryote  | 22945      | ?            | 52.66  | 2410     | -   |
| pfs       | 87        | Eukaryote  | 18589      | X            | 61.80  | 6584     | -   |
| spe       | 87        | Eukaryote  | 10150      | X            | 45.70  | 5064     | -   |
| pac       | 87        | Eukaryote  | 6797       | -            | 30.32  | 2368     | -   |
| cpi       | 87        | Eukaryote  | 1590       | X            | 8.74   | 7399     | -   |
| bth       | SRR043421 | Eukaryote  | 3659       | X            | 36.70  | 4902     | -   |

Table S4 : **Detection of putative GTA clusters in KEGG genomes.** Each line describes a region considered as a putative GTA cluster (complete or fragmented), and displays the first and last gene of the region, the number of GTA-associated genes, number of viral-associated genes, and the taxonomic affiliation of the species involved.

| gene_start         | gene_stop          | nb_genes | nb_GTA_genes | nb_viral_genes | species | kingdom  | class               | genus            | species                                          |
|--------------------|--------------------|----------|--------------|----------------|---------|----------|---------------------|------------------|--------------------------------------------------|
| rfe:RF_0311        | rfe:RF_0318        | 8        | 1            | 2              | rfe     | Bacteria | Alphaproteobacteria | Rickettsia       | Rickettsia felis                                 |
| rfe:RF_0471        | rfe:RF_0471        | 1        | 1            | 1              | rfe     | Bacteria | Alphaproteobacteria | Rickettsia       | Rickettsia felis                                 |
| rfe:RF_0479        | rfe:RF_0479        | 1        | 1            | 1              | rfe     | Bacteria | Alphaproteobacteria | Rickettsia       | Rickettsia felis                                 |
| rfe:RF_0745        | rfe:RF_0759        | 15       | 3            | 4              | rfe     | Bacteria | Alphaproteobacteria | Rickettsia       | Rickettsia felis                                 |
| rbe:RBE_0303       | rbe:RBE_0311       | 9        | 3            | 4              | rbe     | Bacteria | Alphaproteobacteria | Rickettsia       | Rickettsia bellii RML369-C                       |
| rbe:RBE_0629       | rbe:RBE_0638       | 10       | 1            | 4              | rbe     | Bacteria | Alphaproteobacteria | Rickettsia       | Rickettsia bellii RML369-C                       |
| rbe:RBE_0759       | rbe:RBE_0759       | 1        | 1            | 1              | rbe     | Bacteria | Alphaproteobacteria | Rickettsia       | Rickettsia bellii RML369-C                       |
| rbo:A11_04355      | rbo:A11_04420      | 12       | 1            | 4              | rbo     | Bacteria | Alphaproteobacteria | Rickettsia       | Rickettsia bellii OSU 85-389                     |
| rbo:A11_04905      | rbo:A11_04905      | 1        | 1            | 1              | rbo     | Bacteria | Alphaproteobacteria | Rickettsia       | Rickettsia bellii OSU 85-389                     |
| rbo:A11_06250      | rbo:A11_06285      | 8        | 3            | 3              | rbo     | Bacteria | Alphaproteobacteria | Rickettsia       | Rickettsia bellii OSU 85-389                     |
| ott:OTT_0461       | ott:OTT_0468       | 8        | 1            | 3              | ott     | Bacteria | Alphaproteobacteria | Orientia         | Orientia tsutsugamushi Ikeda                     |
| ott:OTT_0894       | ott:OTT_0904       | 11       | 3            | 5              | ott     | Bacteria | Alphaproteobacteria | Orientia         | Orientia tsutsugamushi Ikeda                     |
| ott:OTT_1321       | ott:OTT_1321       | 1        | 1            | 1              | ott     | Bacteria | Alphaproteobacteria | Orientia         | Orientia tsutsugamushi Ikeda                     |
| wol:WD0379         | wol:WD0383         | 5        | 1            | 2              | wol     | Bacteria | Alphaproteobacteria | Wolbachia        | Wolbachia wMel                                   |
| wol:WD0443         | wol:WD0449         | 6        | 1            | 2              | wol     | Bacteria | Alphaproteobacteria | Wolbachia        | Wolbachia wMel                                   |
| wol:WD0458         | wol:WD0458         | 1        | 1            | 1              | wol     | Bacteria | Alphaproteobacteria | Wolbachia        | Wolbachia wMel                                   |
| wol:WD0744         | wol:WD0749         | 7        | 1            | 1              | wol     | Bacteria | Alphaproteobacteria | Wolbachia        | Wolbachia wMel                                   |
| wol:WD1012         | wol:WD1012         | 1        | 1            | 1              | wol     | Bacteria | Alphaproteobacteria | Wolbachia        | Wolbachia wMel                                   |
| wol:WD1311         | wol:WD1311         | 1        | 1            | 1              | wol     | Bacteria | Alphaproteobacteria | Wolbachia        | Wolbachia wMel                                   |
| wri:WRI_002750     | wri:WRI_002750     | 1        | 1            | 1              | wri     | Bacteria | Alphaproteobacteria | Wolbachia        | Wolbachia sp. wRi                                |
| wri:WRI_002970     | wri:WRI_003020     | 6        | 1            | 3              | wri     | Bacteria | Alphaproteobacteria | Wolbachia        | Wolbachia sp. wRi                                |
| wri:WRI_004090     | wri:WRI_004090     | 1        | 1            | 1              | wri     | Bacteria | Alphaproteobacteria | Wolbachia        | Wolbachia sp. wRi                                |
| wri:WRI_007300     | wri:WRI_007300     | 1        | 1            | 1              | wri     | Bacteria | Alphaproteobacteria | Wolbachia        | Wolbachia sp. wRi                                |
| wri:WRI_009700     | wri:WRI_009700     | 1        | 1            | 1              | wri     | Bacteria | Alphaproteobacteria | Wolbachia        | Wolbachia sp. wRi                                |
| wri:WRI_013380     | wri:WRI_013380     | 1        | 1            | 1              | wri     | Bacteria | Alphaproteobacteria | Wolbachia        | Wolbachia sp. wRi                                |
| ama:AM397          | ama:AM406          | 8        | 3            | 5              | ama     | Bacteria | Alphaproteobacteria | Anaplasma        | Anaplasma marginale St. Maries                   |
| ama:AM809          | ama:AM809          | 1        | 1            | 1              | ama     | Bacteria | Alphaproteobacteria | Anaplasma        | Anaplasma marginale St. Maries                   |
| ama:AM1304         | ama:AM1305         | 2        | 2            | 2              | ama     | Bacteria | Alphaproteobacteria | Anaplasma        | Anaplasma marginale St. Maries                   |
| amf:AMF_293        | amf:AMF_296        | 4        | 3            | 3              | amf     | Bacteria | Alphaproteobacteria | Anaplasma        | Anaplasma marginale Florida                      |
| amf:AMF_601        | amf:AMF_601        | 1        | 1            | 1              | amf     | Bacteria | Alphaproteobacteria | Anaplasma        | Anaplasma marginale Florida                      |
| amf:AMF_985        | amf:AMF_986        | 2        | 2            | 2              | amf     | Bacteria | Alphaproteobacteria | Anaplasma        | Anaplasma marginale Florida                      |
| acn:ACIS_00100     | acn:ACIS_00101     | 2        | 2            | 2              | acn     | Bacteria | Alphaproteobacteria | Anaplasma        | Anaplasma centrale                               |
| acn:ACIS_00531     | acn:ACIS_00531     | 1        | 1            | 1              | acn     | Bacteria | Alphaproteobacteria | Anaplasma        | Anaplasma centrale                               |
| acn:ACIS_00894     | acn:ACIS_00899     | 4        | 3            | 3              | acn     | Bacteria | Alphaproteobacteria | Anaplasma        | Anaplasma centrale                               |
| aph:APH_0022       | aph:APH_0023       | 2        | 2            | 2              | aph     | Bacteria | Alphaproteobacteria | Anaplasma        | Anaplasma phagocytophilum                        |
| aph:APH_0091       | aph:APH_0091       | 1        | 1            | 1              | aph     | Bacteria | Alphaproteobacteria | Anaplasma        | Anaplasma phagocytophilum                        |
| aph:APH_0378       | aph:APH_0378       | 1        | 1            | 1              | aph     | Bacteria | Alphaproteobacteria | Anaplasma        | Anaplasma phagocytophilum                        |
| aph:APH_0680       | aph:APH_0688       | 9        | 2            | 2              | aph     | Bacteria | Alphaproteobacteria | Anaplasma        | Anaplasma phagocytophilum                        |
| aph:APH_0861       | aph:APH_0861       | 1        | 1            | 1              | aph     | Bacteria | Alphaproteobacteria | Anaplasma        | Anaplasma phagocytophilum                        |
| eru:Erum0200       | eru:Erum0210       | 2        | 2            | 2              | eru     | Bacteria | Alphaproteobacteria | Ehrlichia        | Ehrlichia ruminantium Welgevonden (South Africa) |
| eru:Erum2630       | eru:Erum2660       | 4        | 3            | 3              | eru     | Bacteria | Alphaproteobacteria | Ehrlichia        | Ehrlichia ruminantium Welgevonden (South Africa) |
| eru:Erum5190       | eru:Erum5230       | 5        | 1            | 2              | eru     | Bacteria | Alphaproteobacteria | Ehrlichia        | Ehrlichia ruminantium Welgevonden (South Africa) |
| erw:ERWE_CDS_00070 | erw:ERWE_CDS_00080 | 2        | 2            | 2              | erw     | Bacteria | Alphaproteobacteria | Ehrlichia        | Ehrlichia ruminantium Welgevonden (France)       |
| erw:ERWE_CDS_02670 | erw:ERWE_CDS_02700 | 4        | 3            | 3              | erw     | Bacteria | Alphaproteobacteria | Ehrlichia        | Ehrlichia ruminantium Welgevonden (France)       |
| erw:ERWE_CDS_05440 | erw:ERWE_CDS_05500 | 7        | 1            | 2              | erw     | Bacteria | Alphaproteobacteria | Ehrlichia        | Ehrlichia ruminantium Welgevonden (France)       |
| erg:ERGA_CDS_00070 | erg:ERGA_CDS_00080 | 2        | 2            | 2              | erg     | Bacteria | Alphaproteobacteria | Ehrlichia        | Ehrlichia ruminantium Gardel                     |
| erg:ERGA_CDS_02630 | erg:ERGA_CDS_02660 | 4        | 3            | 3              | erg     | Bacteria | Alphaproteobacteria | Ehrlichia        | Ehrlichia ruminantium Gardel                     |
| erg:ERGA_CDS_05340 | erg:ERGA_CDS_05390 | 6        | 1            | 2              | erg     | Bacteria | Alphaproteobacteria | Ehrlichia        | Ehrlichia ruminantium Gardel                     |
| ecn:Ecaj_0012      | ecn:Ecaj_0013      | 2        | 2            | 2              | ecn     | Bacteria | Alphaproteobacteria | Ehrlichia        | Ehrlichia canis                                  |
| ecn:Ecaj_0253      | ecn:Ecaj_0256      | 4        | 3            | 3              | ecn     | Bacteria | Alphaproteobacteria | Ehrlichia        | Ehrlichia canis                                  |
| ecn:Ecaj_0528      | ecn:Ecaj_0528      | 1        | 1            | 1              | ecn     | Bacteria | Alphaproteobacteria | Ehrlichia        | Ehrlichia canis                                  |
| ech:ECH_0032       | ech:ECH_0033       | 2        | 2            | 2              | ech     | Bacteria | Alphaproteobacteria | Ehrlichia        | Ehrlichia chaffeensis                            |
| ech:ECH_0500       | ech:ECH_0500       | 1        | 1            | 1              | ech     | Bacteria | Alphaproteobacteria | Ehrlichia        | Ehrlichia chaffeensis                            |
| ech:ECH_0830       | ech:ECH_0830       | 1        | 1            | 1              | ech     | Bacteria | Alphaproteobacteria | Ehrlichia        | Ehrlichia chaffeensis                            |
| ech:ECH_0835       | ech:ECH_0836       | 2        | 2            | 2              | ech     | Bacteria | Alphaproteobacteria | Ehrlichia        | Ehrlichia chaffeensis                            |
| pla:Plav_0902      | pla:Plav_0923      | 22       | 12           | 13             | pla     | Bacteria | Alphaproteobacteria | Parvibaculum     | Parvibaculum lavamentivorans                     |
| atu:Atu0948        | atu:Atu8142        | 23       | 9            | 9              | atu     | Bacteria | Alphaproteobacteria | Agrobacterium    | Agrobacterium tumefaciens C58                    |
| avi:Avi_1329       | avi:Avi_1357       | 21       | 13           | 12             | avi     | Bacteria | Alphaproteobacteria | Agrobacterium    | Agrobacterium vitis S4                           |
| bme:BME11338       | bme:BME11350       | 13       | 9            | 7              | bme     | Bacteria | Alphaproteobacteria | Brucella         | Brucella melitensis bv. 1 16M                    |
| bmi:BMEA_A0624     | bmi:BMEA_A0641     | 18       | 10           | 9              | bmi     | Bacteria | Alphaproteobacteria | Brucella         | Brucella melitensis ATCC 23457                   |
| bmf:BAB1_0608      | bmf:BAB1_0627      | 20       | 10           | 9              | bmf     | Bacteria | Alphaproteobacteria | Brucella         | Brucella melitensis biovar Abortus               |
| bmb:BruAb1_0605    | bmb:BruAb1_0622    | 18       | 9            | 9              | bmb     | Bacteria | Alphaproteobacteria | Brucella         | Brucella abortus 9-941                           |
| bmc:BAbs19_105690  | bmc:BAbs19_105870  | 18       | 11           | 10             | bmc     | Bacteria | Alphaproteobacteria | Brucella         | Brucella abortus S19                             |
| bms:BR0584         | bms:BR0603         | 20       | 11           | 10             | bms     | Bacteria | Alphaproteobacteria | Brucella         | Brucella suis 1330                               |
| bmt:BSUIS_A0613    | bmt:BSUIS_A0633    | 19       | 10           | 9              | bmt     | Bacteria | Alphaproteobacteria | Brucella         | Brucella suis ATCC 23445                         |
| bov:BOV_0584       | bov:BOV_0602       | 19       | 8            | 8              | bov     | Bacteria | Alphaproteobacteria | Brucella         | Brucella ovis                                    |
| bcs:BCAN_A0598     | bcs:BCAN_A0618     | 20       | 11           | 10             | bcs     | Bacteria | Alphaproteobacteria | Brucella         | Brucella canis                                   |
| bmr:BMI_1583       | bmr:BMI_1602       | 20       | 12           | 10             | bmr     | Bacteria | Alphaproteobacteria | Brucella         | Brucella microti                                 |
| rpa:RPA1885        | rpa:RPA1908        | 23       | 11           | 8              | rpa     | Bacteria | Alphaproteobacteria | Rhodopseudomonas | Rhodopseudomonas palustris CGA009                |
| rpa:RPA1912        | rpa:RPA1912        | 1        | 1            | 1              | rpa     | Bacteria | Alphaproteobacteria | Rhodopseudomonas | Rhodopseudomonas palustris CGA009                |
| rpa:RPA1914        | rpa:RPA1914        | 1        | 1            | 1              | rpa     | Bacteria | Alphaproteobacteria | Rhodopseudomonas | Rhodopseudomonas palustris CGA009                |
| rbp:RPB_3455       | rbp:RPB_3491       | 37       | 15           | 16             | rbp     | Bacteria | Alphaproteobacteria | Rhodopseudomonas | Rhodopseudomonas palustris HaA2                  |
| rpc:RPC_1797       | rpc:RPC_1829       | 33       | 12           | 10             | rpc     | Bacteria | Alphaproteobacteria | Rhodopseudomonas | Rhodopseudomonas palustris BisB18                |
| rdp:RPD_1964       | rdp:RPD_1987       | 24       | 9            | 8              | rdp     | Bacteria | Alphaproteobacteria | Rhodopseudomonas | Rhodopseudomonas palustris BisB5                 |
| rdp:RPD_1991       | rdp:RPD_1996       | 6        | 4            | 5              | rdp     | Bacteria | Alphaproteobacteria | Rhodopseudomonas | Rhodopseudomonas palustris BisB5                 |
| rpe:RPE_1893       | rpe:RPE_1893       | 1        | 1            | 1              | rpe     | Bacteria | Alphaproteobacteria | Rhodopseudomonas | Rhodopseudomonas palustris BisA53                |
| rpe:RPE_1895       | rpe:RPE_1898       | 4        | 2            | 2              | rpe     | Bacteria | Alphaproteobacteria | Rhodopseudomonas | Rhodopseudomonas palustris BisA53                |
| rpe:RPE_1902       | rpe:RPE_1927       | 26       | 10           | 8              | rpe     | Bacteria | Alphaproteobacteria | Rhodopseudomonas | Rhodopseudomonas palustris BisA53                |
| rpt:Rpal_2082      | rpt:Rpal_2102      | 11       | 4            | 5              | rpt     | Bacteria | Alphaproteobacteria | Rhodopseudomonas | Rhodopseudomonas palustris TIE-1                 |
| rpt:Rpal_2106      | rpt:Rpal_2116      | 11       | 7            | 4              | rpt     | Bacteria | Alphaproteobacteria | Rhodopseudomonas | Rhodopseudomonas palustris TIE-1                 |
| rpt:Rpal_2122      | rpt:Rpal_2122      | 1        | 1            | 1              | rpt     | Bacteria | Alphaproteobacteria | Rhodopseudomonas | Rhodopseudomonas palustris TIE-1                 |
| rpt:Rpal_2124      | rpt:Rpal_2124      | 1        | 1            | 1              | rpt     | Bacteria | Alphaproteobacteria | Rhodopseudomonas | Rhodopseudomonas palustris TIE-1                 |

| gene_start         | gene_stop          | nb_genes | nb_GTA_genes | nb_viral_genes | species | kingdom  | class               | genus              | species                            |
|--------------------|--------------------|----------|--------------|----------------|---------|----------|---------------------|--------------------|------------------------------------|
| nwi:Nwi_1159       | nwi:Nwi_1186       | 28       | 12           | 11             | nwi     | Bacteria | Alphaproteobacteria | Nitrobacter        | Nitrobacter winogradskyi           |
| nha:Nham_1408      | nha:Nham_1415      | 8        | 4            | 4              | nha     | Bacteria | Alphaproteobacteria | Nitrobacter        | Nitrobacter hamburgensis           |
| nha:Nham_1419      | nha:Nham_1432      | 14       | 7            | 7              | nha     | Bacteria | Alphaproteobacteria | Nitrobacter        | Nitrobacter hamburgensis           |
| oca:OCAR_6586      | oca:OCAR_6597      | 12       | 7            | 6              | oca     | Bacteria | Alphaproteobacteria | Oligotropha        | Oligotropha carboxidovorans        |
| oca:OCAR_6601      | oca:OCAR_6611      | 11       | 4            | 4              | oca     | Bacteria | Alphaproteobacteria | Oligotropha        | Oligotropha carboxidovorans        |
| xau:Xaut_3144      | xau:Xaut_3150      | 7        | 2            | 3              | xau     | Bacteria | Alphaproteobacteria | Xanthobacter       | Xanthobacter autotrophicus         |
| xau:Xaut_3154      | xau:Xaut_3164      | 11       | 5            | 4              | xau     | Bacteria | Alphaproteobacteria | Xanthobacter       | Xanthobacter autotrophicus         |
| xau:Xaut_3168      | xau:Xaut_3175      | 8        | 4            | 6              | xau     | Bacteria | Alphaproteobacteria | Xanthobacter       | Xanthobacter autotrophicus         |
| azc:AZC_1105       | azc:AZC_1105       | 1        | 1            | 1              | azc     | Bacteria | Alphaproteobacteria | Azorhizobium       | Azorhizobium caulinodans           |
| azc:AZC_1109       | azc:AZC_1128       | 20       | 10           | 11             | azc     | Bacteria | Alphaproteobacteria | Azorhizobium       | Azorhizobium caulinodans           |
| azc:AZC_3029       | azc:AZC_3029       | 1        | 1            | 1              | azc     | Bacteria | Alphaproteobacteria | Azorhizobium       | Azorhizobium caulinodans           |
| sno:Snov_0699      | sno:Snov_0724      | 26       | 11           | 13             | sno     | Bacteria | Alphaproteobacteria | Starkeya           | Starkeya novella                   |
| mex:Mex_1412       | mex:Mex_1434       | 23       | 11           | 12             | mex     | Bacteria | Alphaproteobacteria | Methylobacterium   | Methylobacterium extorquens        |
| mea:Mex_1p1299     | mea:Mex_1p1322     | 24       | 11           | 12             | mea     | Bacteria | Alphaproteobacteria | Methylobacterium   | Methylobacterium extorquens AM1    |
| mdi:METDI2070      | mdi:METDI2094      | 25       | 11           | 12             | mdi     | Bacteria | Alphaproteobacteria | Methylobacterium   | Methylobacterium extorquens DM4    |
| mrd:Mrad2831_4959  | mrd:Mrad2831_4965  | 7        | 4            | 4              | mrd     | Bacteria | Alphaproteobacteria | Methylobacterium   | Methylobacterium radiotolerans     |
| mrd:Mrad2831_4969  | mrd:Mrad2831_4981  | 13       | 8            | 5              | mrd     | Bacteria | Alphaproteobacteria | Methylobacterium   | Methylobacterium radiotolerans     |
| mpp:Mpop_1408      | mpp:Mpop_1421      | 14       | 6            | 7              | mpp     | Bacteria | Alphaproteobacteria | Methylobacterium   | Methylobacterium populi            |
| mpp:Mpop_1426      | mpp:Mpop_1431      | 6        | 4            | 5              | mpp     | Bacteria | Alphaproteobacteria | Methylobacterium   | Methylobacterium populi            |
| mch:Mchl_1686      | mch:Mchl_1709      | 24       | 11           | 12             | mch     | Bacteria | Alphaproteobacteria | Methylobacterium   | Methylobacterium chloromethanicum  |
| mno:Mnod_2003      | mno:Mnod_2018      | 16       | 4            | 7              | mno     | Bacteria | Alphaproteobacteria | Methylobacterium   | Methylobacterium nodulans          |
| mno:Mnod_2593      | mno:Mnod_2618      | 26       | 5            | 19             | mno     | Bacteria | Alphaproteobacteria | Methylobacterium   | Methylobacterium nodulans          |
| mno:Mnod_4275      | mno:Mnod_4299      | 25       | 5            | 20             | mno     | Bacteria | Alphaproteobacteria | Methylobacterium   | Methylobacterium nodulans          |
| mno:Mnod_6557      | mno:Mnod_6577      | 21       | 4            | 12             | mno     | Bacteria | Alphaproteobacteria | Methylobacterium   | Methylobacterium nodulans          |
| mno:Mnod_7308      | mno:Mnod_7342      | 35       | 6            | 13             | mno     | Bacteria | Alphaproteobacteria | Methylobacterium   | Methylobacterium nodulans          |
| msi:Msil_2179      | msi:Msil_2179      | 1        | 1            | 1              | msi     | Bacteria | Alphaproteobacteria | Methylocella       | Methylocella silvestris            |
| msi:Msil_3038      | msi:Msil_3069      | 32       | 4            | 8              | msi     | Bacteria | Alphaproteobacteria | Methylocella       | Methylocella silvestris            |
| ccr:CC_2772        | ccr:CC_2790        | 19       | 10           | 10             | ccr     | Bacteria | Alphaproteobacteria | Caulobacter        | Caulobacter crescentus CB15        |
| ccs:CCNA_02859     | ccs:CCNA_02877     | 18       | 9            | 9              | ccs     | Bacteria | Alphaproteobacteria | Caulobacter        | Caulobacter crescentus NA1000      |
| ccs:CCNA_02880     | ccs:CCNA_02880     | 1        | 1            | 1              | ccs     | Bacteria | Alphaproteobacteria | Caulobacter        | Caulobacter crescentus NA1000      |
| cak:Caul_3900      | cak:Caul_3920      | 21       | 9            | 9              | cak     | Bacteria | Alphaproteobacteria | Caulobacter        | Caulobacter sp. K31                |
| cse:Cseq_0983      | cse:Cseq_1002      | 20       | 9            | 9              | cse     | Bacteria | Alphaproteobacteria | Caulobacter        | Caulobacter segnis                 |
| bsb:Bresu_1222     | bsb:Bresu_1249     | 28       | 3            | 10             | bsb     | Bacteria | Alphaproteobacteria | Brevundimonas      | Brevundimonas subvibrioides        |
| bsb:Bresu_1255     | bsb:Bresu_1273     | 19       | 6            | 6              | bsb     | Bacteria | Alphaproteobacteria | Brevundimonas      | Brevundimonas subvibrioides        |
| sil:SPO2249        | sil:SPO2267        | 17       | 17           | 9              | sil     | Bacteria | Alphaproteobacteria | Ruegeria           | Silicibacter pomeroyi              |
| sit:TM1040_1056    | sit:TM1040_1074    | 19       | 18           | 10             | sit     | Bacteria | Alphaproteobacteria | Ruegeria           | Ruegeria sp. TM1040                |
| rsp:RSP_2465       | rsp:RSP_2480       | 18       | 16           | 9              | rsp     | Bacteria | Alphaproteobacteria | Rhodobacter        | Rhodobacter sphaeroides 2.4.1      |
| rsh:Rsph17029_1128 | rsh:Rsph17029_1145 | 18       | 17           | 9              | rsh     | Bacteria | Alphaproteobacteria | Rhodobacter        | Rhodobacter sphaeroides ATCC 17029 |
| rsq:Rsph17025_1073 | rsq:Rsph17025_1090 | 18       | 17           | 9              | rsq     | Bacteria | Alphaproteobacteria | Rhodobacter        | Rhodobacter sphaeroides ATCC 17025 |
| rsk:RSKD131_0781   | rsk:RSKD131_0797   | 17       | 17           | 9              | rsk     | Bacteria | Alphaproteobacteria | Rhodobacter        | Rhodobacter sphaeroides KD131      |
| rcp:RCAP_rcc01682  | rcp:RCAP_rcc01699  | 18       | 18           | 9              | rcp     | Bacteria | Alphaproteobacteria | Rhodobacter        | Rhodobacter capsulatus             |
| jan:Jann_1631      | jan:Jann_1647      | 17       | 16           | 11             | jan     | Bacteria | Alphaproteobacteria | Jannaschia         | Jannaschia sp. CCS1                |
| rde:RD1_3016       | rde:RD1_3035       | 17       | 16           | 9              | rde     | Bacteria | Alphaproteobacteria | Roseobacter        | Roseobacter denitrificans          |
| pde:Pden_2886      | pde:Pden_2902      | 17       | 16           | 10             | pde     | Bacteria | Alphaproteobacteria | Paracoccus         | Paracoccus denitrificans           |
| dsh:Dshi_2162      | dsh:Dshi_2179      | 18       | 15           | 10             | dsh     | Bacteria | Alphaproteobacteria | Dinoroseobacter    | Dinoroseobacter shibae             |
| mmr:Mmar10_0917    | mmr:Mmar10_0934    | 18       | 9            | 9              | mmr     | Bacteria | Alphaproteobacteria | Maricaulis         | Maricaulis maris                   |
| hba:Hbal_1246      | hba:Hbal_1255      | 10       | 4            | 4              | hba     | Bacteria | Alphaproteobacteria | Hirschia           | Hirschia baltica                   |
| hba:Hbal_1259      | hba:Hbal_1268      | 10       | 6            | 5              | hba     | Bacteria | Alphaproteobacteria | Hirschia           | Hirschia baltica                   |
| nar:Saro_3116      | nar:Saro_3133      | 18       | 8            | 8              | nar     | Bacteria | Alphaproteobacteria | Novosphingobium    | Novosphingobium aromaticivorans    |
| sal:Sala_1989      | sal:Sala_2005      | 17       | 8            | 9              | sal     | Bacteria | Alphaproteobacteria | Sphingopyxis       | Sphingopyxis alaskensis            |
| sjp:SJA_C1-12210   | sjp:SJA_C1-12390   | 19       | 8            | 7              | sjp     | Bacteria | Alphaproteobacteria | Sphingobium        | Sphingobium japonicum              |
| eli:ELI_13955      | eli:ELI_14045      | 19       | 9            | 8              | eli     | Bacteria | Alphaproteobacteria | Erythrobracter     | Erythrobracter litoralis           |
| pbr:PB2503_08004   | pbr:PB2503_08139   | 28       | 9            | 11             | pbr     | Bacteria | Alphaproteobacteria | Parularcula        | Parularcula bermudensis            |
| bhy:BHWA1_01823    | bhy:BHWA1_01856    | 24       | 24           | 1              | bhy     | Bacteria | Spirochaetes        | Brachyspira        | Brachyspira hyodysenteriae         |
| brm:Bmur_1423      | brm:Bmur_1441      | 19       | 13           | 1              | brm     | Bacteria | Spirochaetes        | Brachyspira        | Brachyspira murdochii              |
| bpo:BP951000_1199  | bpo:BP951000_1209  | 11       | 11           | 0              | bpo     | Bacteria | Spirochaetes        | Brachyspira        | Brachyspira pilosicoli             |
| bpo:BP951000_1214  | bpo:BP951000_1221  | 8        | 5            | 2              | bpo     | Bacteria | Spirochaetes        | Brachyspira        | Brachyspira pilosicoli             |
| mfe:Mefer_1536     | mfe:Mefer_1553     | 19       | 7            | 3              | mfe     | Archaea  | Euryarchaeota       | Methanocaldococcus | Methanocaldococcus fervens         |
| mvo:Mvol_0401      | mvo:Mvol_0415      | 15       | 15           | 4              | mvo     | Archaea  | Euryarchaeota       | Methanococcus      | Methanococcus voltae               |

Table S5 : **Complete table of Kegg Orthologous groups retrieved in the viromes considered as free from any cellular DNA** (viromes with no rDNA detected).

| Pathway                                   | KO                                               | Name                 | Definition                                                                                    | Class                                                                                                                                                                                       | Nb Reads                                                                                                                                                                                    | Nb Viromes |   |
|-------------------------------------------|--------------------------------------------------|----------------------|-----------------------------------------------------------------------------------------------|---------------------------------------------------------------------------------------------------------------------------------------------------------------------------------------------|---------------------------------------------------------------------------------------------------------------------------------------------------------------------------------------------|------------|---|
| ko00010_Glycolysis / Gluconeogenesis      | K00001                                           | E1.1.1.1, adh        | alcohol dehydrogenase [EC:1.1.1.1]                                                            | Carbohydrate Metabolism - Metabolism of Cofactors and Vitamins - Xenobiotics Biodegradation and Metabolism - Amino Acid Metabolism - Lipid Metabolism                                       | 1                                                                                                                                                                                           | 1          |   |
|                                           | K00121                                           | frmA, ADH5, adhC     | S-(hydroxymethyl)glutathione dehydrogenase / alcohol dehydrogenase [EC:1.1.1.284 1.1.1.1]     | Carbohydrate Metabolism - Metabolism of Cofactors and Vitamins - Xenobiotics Biodegradation and Metabolism - Amino Acid Metabolism - Lipid Metabolism - Energy Metabolism                   | 8                                                                                                                                                                                           | 3          |   |
|                                           | K00128                                           | E1.2.1.3             | aldehyde dehydrogenase (NAD+) [EC:1.2.1.3]                                                    | Carbohydrate Metabolism - Metabolism of Other Amino Acids - Xenobiotics Biodegradation and Metabolism - Metabolism of Terpenoids and Polyketides - Amino Acid Metabolism - Lipid Metabolism | 4                                                                                                                                                                                           | 4          |   |
|                                           | K00134                                           | GAPDH, gapA          | glyceraldehyde 3-phosphate dehydrogenase [EC:1.2.1.12]                                        | Carbohydrate Metabolism - Neurodegenerative Diseases                                                                                                                                        | 3                                                                                                                                                                                           | 2          |   |
|                                           | K00161                                           | PDHA, pdhA           | pyruvate dehydrogenase E1 component subunit alpha [EC:1.2.4.1]                                | Carbohydrate Metabolism - Amino Acid Metabolism                                                                                                                                             | 57                                                                                                                                                                                          | 3          |   |
|                                           | K00162                                           | PDHB, pdhB           | pyruvate dehydrogenase E1 component subunit beta [EC:1.2.4.1]                                 | Carbohydrate Metabolism - Amino Acid Metabolism                                                                                                                                             | 37                                                                                                                                                                                          | 3          |   |
|                                           | K00382                                           | DLA, lpd, pdhD       | dihydropyridine dehydrogenase [EC:1.8.1.4]                                                    | Carbohydrate Metabolism - Amino Acid Metabolism                                                                                                                                             | 1                                                                                                                                                                                           | 1          |   |
|                                           | K00627                                           | DLAT, aceF, pdhC     | pyruvate dehydrogenase E2 component (dihydropyridine acetyltransferase) [EC:2.3.1.12]         | Carbohydrate Metabolism                                                                                                                                                                     | 1                                                                                                                                                                                           | 1          |   |
|                                           | K00845                                           | glk                  | glucokinase [EC:2.7.1.2]                                                                      | Carbohydrate Metabolism - Biosynthesis of Other Secondary Metabolites                                                                                                                       | 2                                                                                                                                                                                           | 2          |   |
|                                           | K00927                                           | PGK, pgk             | phosphoglycerate kinase [EC:2.7.2.3]                                                          | Carbohydrate Metabolism - Energy Metabolism                                                                                                                                                 | 2                                                                                                                                                                                           | 1          |   |
|                                           | K01610                                           | E4.1.1.49, pckA      | phosphoenolpyruvate carboxykinase (ATP) [EC:4.1.1.49]                                         | Carbohydrate Metabolism - Energy Metabolism                                                                                                                                                 | 4                                                                                                                                                                                           | 2          |   |
|                                           | K01623                                           | ALDO, fbaB           | fructose-bisphosphate aldolase, class I [EC:4.1.2.13]                                         | Carbohydrate Metabolism - Energy Metabolism                                                                                                                                                 | 12                                                                                                                                                                                          | 1          |   |
|                                           | K01624                                           | FBA, fbaA            | fructose-bisphosphate aldolase, class II [EC:4.1.2.13]                                        | Carbohydrate Metabolism - Energy Metabolism                                                                                                                                                 | 2                                                                                                                                                                                           | 1          |   |
|                                           | K01792                                           | E5.1.3.15            | glucose-6-phosphate 1-epimerase [EC:5.1.3.15]                                                 | Carbohydrate Metabolism                                                                                                                                                                     | 1                                                                                                                                                                                           | 1          |   |
|                                           | K01810                                           | GPI, pgi             | glucose-6-phosphate isomerase [EC:5.3.1.9]                                                    | Carbohydrate Metabolism                                                                                                                                                                     | 2                                                                                                                                                                                           | 2          |   |
|                                           | K01895                                           | ACSS, acs            | acetyl-CoA synthetase [EC:6.2.1.1]                                                            | Carbohydrate Metabolism - Lipid Metabolism - Energy Metabolism                                                                                                                              | 1                                                                                                                                                                                           | 1          |   |
|                                           | K02791                                           | PTS-Mal-EIIC, malX   | PTS system, maltose and glucose-specific IIC component                                        | Carbohydrate Metabolism - Membrane Transport                                                                                                                                                | 1                                                                                                                                                                                           | 1          |   |
|                                           | K04041                                           | fbp3                 | fructose-1,6-bisphosphatase III [EC:3.1.3.11]                                                 | Carbohydrate Metabolism - Energy Metabolism                                                                                                                                                 | 1                                                                                                                                                                                           | 1          |   |
|                                           | K13953                                           | adhP                 | alcohol dehydrogenase, propanol-preferring [EC:1.1.1.1]                                       | Carbohydrate Metabolism - Metabolism of Cofactors and Vitamins - Xenobiotics Biodegradation and Metabolism - Amino Acid Metabolism - Lipid Metabolism                                       | 1                                                                                                                                                                                           | 1          |   |
|                                           | ko00020_Citrate cycle (TCA cycle)                | K00024               | mdh                                                                                           | malate dehydrogenase [EC:1.1.1.37]                                                                                                                                                          | Carbohydrate Metabolism - Energy Metabolism                                                                                                                                                 | 3          | 3 |
| K00161                                    |                                                  | PDHA, pdhA           | pyruvate dehydrogenase E1 component subunit alpha [EC:1.2.4.1]                                | Carbohydrate Metabolism - Amino Acid Metabolism                                                                                                                                             | 57                                                                                                                                                                                          | 3          |   |
| K00162                                    |                                                  | PDHB, pdhB           | pyruvate dehydrogenase E1 component subunit beta [EC:1.2.4.1]                                 | Carbohydrate Metabolism - Amino Acid Metabolism                                                                                                                                             | 37                                                                                                                                                                                          | 3          |   |
| K00164                                    |                                                  | OGDH, sucA           | 2-oxoglutarate dehydrogenase E1 component [EC:1.2.4.2]                                        | Carbohydrate Metabolism - Amino Acid Metabolism                                                                                                                                             | 2                                                                                                                                                                                           | 1          |   |
| K00174                                    |                                                  | korA                 | 2-oxoglutarate ferredoxin oxidoreductase subunit alpha [EC:1.2.7.3]                           | Carbohydrate Metabolism - Energy Metabolism                                                                                                                                                 | 1                                                                                                                                                                                           | 1          |   |
| K00175                                    |                                                  | korB                 | 2-oxoglutarate ferredoxin oxidoreductase subunit beta [EC:1.2.7.3]                            | Carbohydrate Metabolism - Energy Metabolism                                                                                                                                                 | 2                                                                                                                                                                                           | 2          |   |
| K00239                                    |                                                  | sdhA                 | succinate dehydrogenase flavoprotein subunit [EC:1.3.99.1]                                    | Carbohydrate Metabolism - Xenobiotics Biodegradation and Metabolism - Energy Metabolism                                                                                                     | 2                                                                                                                                                                                           | 2          |   |
| K00240                                    |                                                  | sdhB                 | succinate dehydrogenase iron-sulfur protein [EC:1.3.99.1]                                     | Carbohydrate Metabolism - Xenobiotics Biodegradation and Metabolism - Energy Metabolism                                                                                                     | 18                                                                                                                                                                                          | 1          |   |
| K00382                                    |                                                  | DLA, lpd, pdhD       | dihydropyridine dehydrogenase [EC:1.8.1.4]                                                    | Carbohydrate Metabolism - Amino Acid Metabolism                                                                                                                                             | 1                                                                                                                                                                                           | 1          |   |
| K00627                                    |                                                  | DLAT, aceF, pdhC     | pyruvate dehydrogenase E2 component (dihydropyridine acetyltransferase) [EC:2.3.1.12]         | Carbohydrate Metabolism                                                                                                                                                                     | 1                                                                                                                                                                                           | 1          |   |
| K00658                                    |                                                  | DLST, sucB           | 2-oxoglutarate dehydrogenase E2 component (dihydropyridine succinyltransferase) [EC:2.3.1.61] | Carbohydrate Metabolism - Amino Acid Metabolism                                                                                                                                             | 2                                                                                                                                                                                           | 2          |   |
| K01610                                    |                                                  | E4.1.1.49, pckA      | phosphoenolpyruvate carboxykinase (ATP) [EC:4.1.1.49]                                         | Carbohydrate Metabolism - Energy Metabolism                                                                                                                                                 | 4                                                                                                                                                                                           | 2          |   |
| K01681                                    |                                                  | ACO, acnA            | aconitate hydratase 1 [EC:4.2.1.3]                                                            | Carbohydrate Metabolism - Energy Metabolism                                                                                                                                                 | 4                                                                                                                                                                                           | 3          |   |
| ko00030_Pentose phosphate pathway         |                                                  | K00033               | E1.1.1.44, PGD, gnd                                                                           | 6-phosphogluconate dehydrogenase [EC:1.1.1.44]                                                                                                                                              | Carbohydrate Metabolism - Metabolism of Other Amino Acids                                                                                                                                   | 20         | 3 |
|                                           | K00036                                           | G6PD, zwf            | glucose-6-phosphate 1-dehydrogenase [EC:1.1.1.49]                                             | Carbohydrate Metabolism - Metabolism of Other Amino Acids                                                                                                                                   | 22                                                                                                                                                                                          | 2          |   |
|                                           | K00615                                           | E2.2.1.1, tkkA, tkkB | transketolase [EC:2.2.1.1]                                                                    | Carbohydrate Metabolism - Metabolism of Terpenoids and Polyketides - Energy Metabolism                                                                                                      | 59                                                                                                                                                                                          | 3          |   |
|                                           | K00616                                           | E2.2.1.2, talA, talB | transaldolase [EC:2.2.1.2]                                                                    | Carbohydrate Metabolism                                                                                                                                                                     | 46                                                                                                                                                                                          | 4          |   |
|                                           | K00852                                           | E2.7.1.15, rbsK      | ribokinase [EC:2.7.1.15]                                                                      | Carbohydrate Metabolism                                                                                                                                                                     | 3                                                                                                                                                                                           | 2          |   |
|                                           | K00874                                           | kdgK                 | 2-dehydro-3-deoxygluconokinase [EC:2.7.1.45]                                                  | Carbohydrate Metabolism                                                                                                                                                                     | 1                                                                                                                                                                                           | 1          |   |
|                                           | K00948                                           | PRPS, prsA           | ribose-phosphate pyrophosphokinase [EC:2.7.6.1]                                               | Carbohydrate Metabolism - Nucleotide Metabolism                                                                                                                                             | 9                                                                                                                                                                                           | 6          |   |
|                                           | K01619                                           | E4.1.2.4, deoC       | deoxyribose-phosphate aldolase [EC:4.1.2.4]                                                   | Carbohydrate Metabolism                                                                                                                                                                     | 3                                                                                                                                                                                           | 2          |   |
|                                           | K01623                                           | ALDO, fbaB           | fructose-bisphosphate aldolase, class I [EC:4.1.2.13]                                         | Carbohydrate Metabolism - Energy Metabolism                                                                                                                                                 | 12                                                                                                                                                                                          | 1          |   |
|                                           | K01624                                           | FBA, fbaA            | fructose-bisphosphate aldolase, class II [EC:4.1.2.13]                                        | Carbohydrate Metabolism - Energy Metabolism                                                                                                                                                 | 2                                                                                                                                                                                           | 1          |   |
|                                           | K01783                                           | rpe, RPE             | ribulose-phosphate 3-epimerase [EC:5.1.3.1]                                                   | Carbohydrate Metabolism - Energy Metabolism                                                                                                                                                 | 1                                                                                                                                                                                           | 1          |   |
|                                           | K01808                                           | E5.3.1.6B, rpiB      | ribose 5-phosphate isomerase B [EC:5.3.1.6]                                                   | Carbohydrate Metabolism - Energy Metabolism                                                                                                                                                 | 10                                                                                                                                                                                          | 3          |   |
|                                           | K01810                                           | GPI, pgi             | glucose-6-phosphate isomerase [EC:5.3.1.9]                                                    | Carbohydrate Metabolism                                                                                                                                                                     | 2                                                                                                                                                                                           | 2          |   |
|                                           | K04041                                           | fbp3                 | fructose-1,6-bisphosphatase III [EC:3.1.3.11]                                                 | Carbohydrate Metabolism - Energy Metabolism                                                                                                                                                 | 1                                                                                                                                                                                           | 1          |   |
|                                           | ko00040_Pentose and glucuronate interconversions | K00012               | UGDH, ugd                                                                                     | UDPglucose 6-dehydrogenase [EC:1.1.1.22]                                                                                                                                                    | Carbohydrate Metabolism                                                                                                                                                                     | 91         | 5 |
|                                           |                                                  | K00041               | uwaB                                                                                          | tagaturonate reductase [EC:1.1.1.58]                                                                                                                                                        | Carbohydrate Metabolism                                                                                                                                                                     | 1          | 1 |
|                                           |                                                  | K00128               | E1.2.1.3                                                                                      | aldehyde dehydrogenase (NAD+) [EC:1.2.1.3]                                                                                                                                                  | Carbohydrate Metabolism - Metabolism of Other Amino Acids - Xenobiotics Biodegradation and Metabolism - Metabolism of Terpenoids and Polyketides - Amino Acid Metabolism - Lipid Metabolism | 4          | 4 |
| K00848                                    |                                                  | rhaB                 | rhamnulokinase [EC:2.7.1.5]                                                                   | Carbohydrate Metabolism                                                                                                                                                                     | 1                                                                                                                                                                                           | 1          |   |
| K00874                                    |                                                  | kdgK                 | 2-dehydro-3-deoxygluconokinase [EC:2.7.1.45]                                                  | Carbohydrate Metabolism                                                                                                                                                                     | 1                                                                                                                                                                                           | 1          |   |
| K01783                                    |                                                  | rpe, RPE             | ribulose-phosphate 3-epimerase [EC:5.1.3.1]                                                   | Carbohydrate Metabolism - Energy Metabolism                                                                                                                                                 | 1                                                                                                                                                                                           | 1          |   |
| K01786                                    |                                                  | araD                 | L-ribulose-5-phosphate 4-epimerase [EC:5.1.3.4]                                               | Carbohydrate Metabolism                                                                                                                                                                     | 1                                                                                                                                                                                           | 1          |   |
| K01812                                    |                                                  | uwaC                 | glucuronate isomerase [EC:5.3.1.12]                                                           | Carbohydrate Metabolism                                                                                                                                                                     | 1                                                                                                                                                                                           | 1          |   |
| K03082                                    |                                                  | sgbU                 | hexulose-6-phosphate isomerase [EC:5.3.1.12]                                                  | Carbohydrate Metabolism                                                                                                                                                                     | 1                                                                                                                                                                                           | 1          |   |
| ko00051_Fructose and mannose metabolism   | K00008                                           | E1.1.1.14, gutB      | L-iditol 2-dehydrogenase [EC:1.1.1.14]                                                        | Carbohydrate Metabolism                                                                                                                                                                     | 3                                                                                                                                                                                           | 2          |   |
|                                           | K00066                                           | algD                 | GDP-mannose 6-dehydrogenase [EC:1.1.1.132]                                                    | Carbohydrate Metabolism - Signal Transduction                                                                                                                                               | 3                                                                                                                                                                                           | 1          |   |
|                                           | K00100                                           | E1.1.1.-             |                                                                                               | Carbohydrate Metabolism - Xenobiotics Biodegradation and Metabolism - Lipid Metabolism                                                                                                      | 1                                                                                                                                                                                           | 1          |   |
|                                           | K00754                                           | E2.4.1.-             |                                                                                               | Carbohydrate Metabolism                                                                                                                                                                     | 149                                                                                                                                                                                         | 4          |   |
|                                           | K00847                                           | rfaB                 | fructokinase [EC:2.7.1.4]                                                                     | Carbohydrate Metabolism                                                                                                                                                                     | 1                                                                                                                                                                                           | 1          |   |
|                                           | K00848                                           | rfaB                 | rhamnulokinase [EC:2.7.1.5]                                                                   | Carbohydrate Metabolism                                                                                                                                                                     | 1                                                                                                                                                                                           | 1          |   |
|                                           | K00966                                           | GMPP                 | mannose-1-phosphate guanylyltransferase [EC:2.7.7.13]                                         | Carbohydrate Metabolism                                                                                                                                                                     | 1                                                                                                                                                                                           | 1          |   |
|                                           | K00971                                           | E2.7.2.2, manC       | mannose-1-phosphate guanylyltransferase [EC:2.7.7.22]                                         | Carbohydrate Metabolism                                                                                                                                                                     | 4                                                                                                                                                                                           | 2          |   |
|                                           | K01623                                           | ALDO, fbaB           | fructose-bisphosphate aldolase, class I [EC:4.1.2.13]                                         | Carbohydrate Metabolism - Energy Metabolism                                                                                                                                                 | 12                                                                                                                                                                                          | 1          |   |
|                                           | K01624                                           | FBA, fbaA            | fructose-bisphosphate aldolase, class II [EC:4.1.2.13]                                        | Carbohydrate Metabolism - Energy Metabolism                                                                                                                                                 | 2                                                                                                                                                                                           | 1          |   |
|                                           | K01628                                           | fucA                 | L-fucose-phosphate aldolase [EC:4.1.2.17]                                                     | Carbohydrate Metabolism                                                                                                                                                                     | 1                                                                                                                                                                                           | 1          |   |
|                                           | K01711                                           | E4.2.1.47, gmd       | GDPmannose 4,6-dehydratase [EC:4.2.1.47]                                                      | Carbohydrate Metabolism                                                                                                                                                                     | 533                                                                                                                                                                                         | 7          |   |
|                                           | K01809                                           | E5.3.1.8, manA       | mannose-6-phosphate isomerase [EC:5.3.1.8]                                                    | Carbohydrate Metabolism                                                                                                                                                                     | 17                                                                                                                                                                                          | 3          |   |
|                                           | K01840                                           | E5.4.2.8, manB       | phosphomannomutase [EC:5.4.2.8]                                                               | Carbohydrate Metabolism                                                                                                                                                                     | 1                                                                                                                                                                                           | 1          |   |
|                                           | K02377                                           | E1.1.1.271, fcl      | GDP-L-fucose synthase [EC:1.1.1.271]                                                          | Carbohydrate Metabolism                                                                                                                                                                     | 251                                                                                                                                                                                         | 7          |   |
|                                           | K02770                                           | PTS-Fru-EIIC, fruA   | PTS system, fructose-specific IIC component                                                   | Carbohydrate Metabolism - Membrane Transport                                                                                                                                                | 1                                                                                                                                                                                           | 1          |   |
|                                           | K02795                                           | PTS-Man-EIIC, manY   | PTS system, mannose-specific IIC component                                                    | Carbohydrate Metabolism - Membrane Transport                                                                                                                                                | 1                                                                                                                                                                                           | 1          |   |
|                                           | K04041                                           | fbp3                 | fructose-1,6-bisphosphatase III [EC:3.1.3.11]                                                 | Carbohydrate Metabolism - Energy Metabolism                                                                                                                                                 | 1                                                                                                                                                                                           | 1          |   |
|                                           | ko00052_Galactose metabolism                     | K00845               | glk                                                                                           | glucokinase [EC:2.7.1.2]                                                                                                                                                                    | Carbohydrate Metabolism - Biosynthesis of Other Secondary Metabolites                                                                                                                       | 2          | 2 |
| K01187                                    |                                                  | E3.2.1.20, malZ      | alpha-glucosidase [EC:3.2.1.20]                                                               | Carbohydrate Metabolism                                                                                                                                                                     | 1                                                                                                                                                                                           | 1          |   |
| K01190                                    |                                                  | lacZ                 | beta-galactosidase [EC:3.2.1.23]                                                              | Carbohydrate Metabolism - Glycan Biosynthesis and Metabolism - Lipid Metabolism                                                                                                             | 1                                                                                                                                                                                           | 1          |   |
| K01193                                    |                                                  | E3.2.1.26, sacA      | beta-fructofuranosidase [EC:3.2.1.26]                                                         | Carbohydrate Metabolism                                                                                                                                                                     | 1                                                                                                                                                                                           | 1          |   |
| K01684                                    |                                                  | E4.2.1.6, dgoAb      | galactonate dehydratase [EC:4.2.1.6]                                                          | Carbohydrate Metabolism                                                                                                                                                                     | 2                                                                                                                                                                                           | 2          |   |
| K01784                                    |                                                  | galE, GALE           | UDP-glucose 4-epimerase [EC:5.1.3.2]                                                          | Carbohydrate Metabolism                                                                                                                                                                     | 175                                                                                                                                                                                         | 8          |   |
| ko00053_Ascorbate and aldarate metabolism |                                                  | K00012               | UGDH, ugd                                                                                     | UDPglucose 6-dehydrogenase [EC:1.1.1.22]                                                                                                                                                    | Carbohydrate Metabolism                                                                                                                                                                     | 91         | 5 |

|                                                             |                        |                                                                                        |                                        |                                                                                                                                                                                                                 |      |   |
|-------------------------------------------------------------|------------------------|----------------------------------------------------------------------------------------|----------------------------------------|-----------------------------------------------------------------------------------------------------------------------------------------------------------------------------------------------------------------|------|---|
| K00128                                                      | E1.2.1.3               | aldehyde dehydrogenase (NAD+)                                                          | [EC:1.2.1.3]                           | Carbohydrate Metabolism - Metabolism of Other Amino Acids - Xenobiotics Biodegradation and Metabolism - Metabolism of Terpenoids and Polyketides - Amino Acid Metabolism - Lipid Metabolism                     | 4    | 4 |
| K03077                                                      | ulaF_sgaE              | L-ribulose-5-phosphate 4-epimerase                                                     | [EC:5.1.3.4]                           | Carbohydrate Metabolism                                                                                                                                                                                         | 1    | 1 |
| ko00061_Fatty acid biosynthesis                             |                        |                                                                                        |                                        |                                                                                                                                                                                                                 |      |   |
| K00059                                                      | fabG                   | 3-oxoacyl-[acyl-carrier protein] reductase                                             | [EC:1.1.1.100]                         | Lipid Metabolism                                                                                                                                                                                                | 10   | 4 |
| K00647                                                      | fabB                   | 3-oxoacyl-[acyl-carrier-protein] synthase I                                            | [EC:2.3.1.41]                          | Lipid Metabolism                                                                                                                                                                                                | 6    | 2 |
| K00648                                                      | fabH                   | 3-oxoacyl-[acyl-carrier-protein] synthase III                                          | [EC:2.3.1.180]                         | Lipid Metabolism                                                                                                                                                                                                | 6    | 3 |
| K01962                                                      | accA                   | acetyl-CoA carboxylase carboxyl transferase subunit alpha                              | [EC:6.4.1.2]                           | Carbohydrate Metabolism - Metabolism of Terpenoids and Polyketides - Lipid Metabolism - Energy Metabolism                                                                                                       | 1    | 1 |
| K01963                                                      | accD                   | acetyl-CoA carboxylase carboxyl transferase subunit beta                               | [EC:6.4.1.2]                           | Carbohydrate Metabolism - Metabolism of Terpenoids and Polyketides - Lipid Metabolism - Energy Metabolism                                                                                                       | 2    | 2 |
| K02372                                                      | fabZ                   | 3R-hydroxymyristoyl ACP dehydrase                                                      | [EC:4.2.1.-]                           | Lipid Metabolism                                                                                                                                                                                                | 1    | 1 |
| K09458                                                      | fabF                   | 3-oxoacyl-[acyl-carrier-protein] synthase II                                           | [EC:2.3.1.179]                         | Lipid Metabolism                                                                                                                                                                                                | 4    | 2 |
| K11263                                                      | bccA                   | acetyl-propionyl-CoA carboxylase, biotin carboxylase, biotin carboxyl carrier protein  | [EC:6.3.4.14]                          | Lipid Metabolism                                                                                                                                                                                                | 1    | 1 |
| ko00071_Fatty acid metabolism                               |                        |                                                                                        |                                        |                                                                                                                                                                                                                 |      |   |
| K00001                                                      | E1.1.1.1, adh          | alcohol dehydrogenase                                                                  | [EC:1.1.1.1]                           | Carbohydrate Metabolism - Metabolism of Cofactors and Vitamins - Xenobiotics Biodegradation and Metabolism - Amino Acid Metabolism - Lipid Metabolism                                                           | 1    | 1 |
| K00121                                                      | frmA, ADH5, adhC       | S-(hydroxymethyl)glutathione dehydrogenase / alcohol dehydrogenase                     | [EC:1.1.1.284 1.1.1.1]                 | Carbohydrate Metabolism - Metabolism of Cofactors and Vitamins - Xenobiotics Biodegradation and Metabolism - Amino Acid Metabolism - Lipid Metabolism - Energy Metabolism                                       | 8    | 3 |
| K00128                                                      | E1.2.1.3               | aldehyde dehydrogenase (NAD+)                                                          | [EC:1.2.1.3]                           | Carbohydrate Metabolism - Metabolism of Other Amino Acids - Xenobiotics Biodegradation and Metabolism - Metabolism of Terpenoids and Polyketides - Amino Acid Metabolism - Lipid Metabolism                     | 4    | 4 |
| K00249                                                      | E1.3.99.3, ACADM, acd  | acyl-CoA dehydrogenase                                                                 | [EC:1.3.99.3]                          | Carbohydrate Metabolism - Metabolism of Other Amino Acids - Endocrine System - Amino Acid Metabolism - Lipid Metabolism                                                                                         | 1    | 1 |
| K00529                                                      | hcaD                   | ferredoxin-NAD+ reductase                                                              | [EC:1.18.1.3]                          | Xenobiotics Biodegradation and Metabolism - Amino Acid Metabolism - Lipid Metabolism                                                                                                                            | 1    | 1 |
| K00626                                                      | E2.3.1.9, atoB         | acetyl-CoA C-acetyltransferase                                                         | [EC:2.3.1.9]                           | Carbohydrate Metabolism - Signal Transduction - Xenobiotics Biodegradation and Metabolism - Metabolism of Terpenoids and Polyketides - Amino Acid Metabolism - Lipid Metabolism - Energy Metabolism             | 4    | 3 |
| K01692                                                      | E4.2.1.17, paaG        | enoyl-CoA hydratase                                                                    | [EC:4.2.1.17]                          | Carbohydrate Metabolism - Metabolism of Other Amino Acids - Xenobiotics Biodegradation and Metabolism - Metabolism of Terpenoids and Polyketides - Amino Acid Metabolism - Lipid Metabolism                     | 33   | 3 |
| K01825                                                      | fadB                   | 3-hydroxyacyl-CoA dehydrogenase / enoyl-CoA hydratase / 3-hydroxybutyryl-CoA epimerase | [EC:1.1.1.35 4.2.1.17 5.1.2.3 5.3.3.8] | Carbohydrate Metabolism - Metabolism of Other Amino Acids - Xenobiotics Biodegradation and Metabolism - Metabolism of Terpenoids and Polyketides - Amino Acid Metabolism - Lipid Metabolism - Energy Metabolism | 1    | 1 |
| K01897                                                      | ACSL, fadD             | long-chain acyl-CoA synthetase                                                         | [EC:6.2.1.3]                           | Endocrine System - Transport and Catabolism - Lipid Metabolism                                                                                                                                                  | 4    | 2 |
| K05297                                                      | E1.18.1.1              | rubredoxin-NAD+ reductase                                                              | [EC:1.18.1.1]                          | Lipid Metabolism                                                                                                                                                                                                | 1    | 1 |
| K06445                                                      | fadE                   | acyl-CoA dehydrogenase                                                                 | [EC:1.3.99.-]                          | Lipid Metabolism                                                                                                                                                                                                | 1    | 1 |
| K13953                                                      | adhP                   | alcohol dehydrogenase, propanol-preferring                                             | [EC:1.1.1.1]                           | Carbohydrate Metabolism - Metabolism of Cofactors and Vitamins - Xenobiotics Biodegradation and Metabolism - Amino Acid Metabolism - Lipid Metabolism                                                           | 1    | 1 |
| ko00072_Synthesis and degradation of ketone bodies          |                        |                                                                                        |                                        |                                                                                                                                                                                                                 |      |   |
| K00626                                                      | E2.3.1.9, atoB         | acetyl-CoA C-acetyltransferase                                                         | [EC:2.3.1.9]                           | Carbohydrate Metabolism - Signal Transduction - Xenobiotics Biodegradation and Metabolism - Metabolism of Terpenoids and Polyketides - Amino Acid Metabolism - Lipid Metabolism - Energy Metabolism             | 4    | 3 |
| K01640                                                      | E4.1.3.4, HMGCL, hmgl  | hydroxymethylglutaryl-CoA lyase                                                        | [EC:4.1.3.4]                           | Carbohydrate Metabolism - Transport and Catabolism - Metabolism of Terpenoids and Polyketides - Amino Acid Metabolism - Lipid Metabolism                                                                        | 18   | 1 |
| ko00130_Ubiquinone and other terpenoid-quinone biosynthesis |                        |                                                                                        |                                        |                                                                                                                                                                                                                 |      |   |
| K03179                                                      | ubiA                   | 4-hydroxybenzoate octaprenyltransferase                                                | [EC:2.5.1.-]                           | Metabolism of Cofactors and Vitamins - Metabolism of Terpenoids and Polyketides                                                                                                                                 | 1    | 1 |
| K03183                                                      | ubiE                   | ubiquinone/menaquinone biosynthesis methyltransferase                                  | [EC:2.1.1.163 2.1.1.-]                 | Metabolism of Cofactors and Vitamins                                                                                                                                                                            | 2    | 2 |
| ko00190_Oxidative phosphorylation                           |                        |                                                                                        |                                        |                                                                                                                                                                                                                 |      |   |
| K00239                                                      | sdhA                   | succinate dehydrogenase flavoprotein subunit                                           | [EC:1.3.99.1]                          | Carbohydrate Metabolism - Xenobiotics Biodegradation and Metabolism - Energy Metabolism                                                                                                                         | 2    | 2 |
| K00240                                                      | sdhB                   | succinate dehydrogenase iron-sulfur protein                                            | [EC:1.3.99.1]                          | Carbohydrate Metabolism - Xenobiotics Biodegradation and Metabolism - Energy Metabolism                                                                                                                         | 18   | 1 |
| K00331                                                      | nuoB                   | NADH dehydrogenase I subunit B                                                         | [EC:1.6.5.3]                           | Energy Metabolism                                                                                                                                                                                               | 2    | 2 |
| K00336                                                      | nuoG                   | NADH dehydrogenase I subunit G                                                         | [EC:1.6.5.3]                           | Energy Metabolism                                                                                                                                                                                               | 1    | 1 |
| K00337                                                      | nuoH                   | NADH dehydrogenase I subunit H                                                         | [EC:1.6.5.3]                           | Energy Metabolism                                                                                                                                                                                               | 2    | 2 |
| K00341                                                      | nuoL                   | NADH dehydrogenase I subunit L                                                         | [EC:1.6.5.3]                           | Energy Metabolism                                                                                                                                                                                               | 2    | 2 |
| K00342                                                      | nuoM                   | NADH dehydrogenase I subunit M                                                         | [EC:1.6.5.3]                           | Energy Metabolism                                                                                                                                                                                               | 1    | 1 |
| K00343                                                      | nuoN                   | NADH dehydrogenase I subunit N                                                         | [EC:1.6.5.3]                           | Energy Metabolism                                                                                                                                                                                               | 1    | 1 |
| K00405                                                      | ccoO                   | cb-type cytochrome c oxidase subunit II                                                | [EC:1.9.3.1]                           | Energy Metabolism                                                                                                                                                                                               | 1    | 1 |
| K00412                                                      | CYTB, petB             | ubiquinol-cytochrome c reductase cytochrome b subunit                                  | [EC:1.10.2.2]                          | Circulatory System - Neurodegenerative Diseases - Energy Metabolism                                                                                                                                             | 7    | 2 |
| K00425                                                      | cydA                   | cytochrome bd-I oxidase subunit I                                                      | [EC:1.10.3.-]                          | Energy Metabolism                                                                                                                                                                                               | 15   | 1 |
| K00426                                                      | cydB                   | cytochrome bd-I oxidase subunit II                                                     | [EC:1.10.3.-]                          | Energy Metabolism                                                                                                                                                                                               | 2    | 2 |
| K01507                                                      | E3.6.1.1, ppa          | inorganic pyrophosphatase                                                              | [EC:3.6.1.1]                           | Energy Metabolism                                                                                                                                                                                               | 3    | 2 |
| K02109                                                      | ATPF0B, atpF           | F-type H+-transporting ATPase subunit b                                                | [EC:3.6.3.14]                          | Energy Metabolism                                                                                                                                                                                               | 2    | 2 |
| K02111                                                      | ATPF1A, atpA           | F-type H+-transporting ATPase subunit alpha                                            | [EC:3.6.3.14]                          | Energy Metabolism                                                                                                                                                                                               | 4    | 2 |
| K02118                                                      | ATPVB, atpB            | V-type H+-transporting ATPase subunit B                                                | [EC:3.6.3.14]                          | Energy Metabolism                                                                                                                                                                                               | 1    | 1 |
| K02274                                                      | coxA                   | cytochrome c oxidase subunit I                                                         | [EC:1.9.3.1]                           | Energy Metabolism                                                                                                                                                                                               | 7    | 2 |
| K02301                                                      | cyoE                   | protoheme IX farnesyltransferase                                                       | [EC:2.5.1.-]                           | Metabolism of Cofactors and Vitamins - Metabolism of Terpenoids and Polyketides - Energy Metabolism                                                                                                             | 2    | 2 |
| K05572                                                      | ndhA                   | NADH dehydrogenase I subunit 1                                                         | [EC:1.6.5.3]                           | Energy Metabolism                                                                                                                                                                                               | 1    | 1 |
| K05580                                                      | ndhI                   | NADH dehydrogenase I subunit I                                                         | [EC:1.6.5.3]                           | Energy Metabolism                                                                                                                                                                                               | 66   | 1 |
| ko00195_Photosynthesis                                      |                        |                                                                                        |                                        |                                                                                                                                                                                                                 |      |   |
| K02109                                                      | ATPF0B, atpF           | F-type H+-transporting ATPase subunit b                                                | [EC:3.6.3.14]                          | Energy Metabolism                                                                                                                                                                                               | 2    | 2 |
| K02111                                                      | ATPF1A, atpA           | F-type H+-transporting ATPase subunit alpha                                            | [EC:3.6.3.14]                          | Energy Metabolism                                                                                                                                                                                               | 4    | 2 |
| K02638                                                      | pefE                   | plastocyanin                                                                           |                                        | Energy Metabolism                                                                                                                                                                                               | 5    | 2 |
| K02639                                                      | pefF                   | ferredoxin                                                                             |                                        | Energy Metabolism                                                                                                                                                                                               | 10   | 2 |
| K02641                                                      | pefH                   | ferredoxin-NADP+ reductase                                                             | [EC:1.18.1.2]                          | Energy Metabolism                                                                                                                                                                                               | 1    | 1 |
| K02689                                                      | psaA                   | photosystem I P700 chlorophyll a apoprotein A1                                         |                                        | Energy Metabolism                                                                                                                                                                                               | 52   | 1 |
| K02690                                                      | psaB                   | photosystem I P700 chlorophyll a apoprotein A2                                         |                                        | Energy Metabolism                                                                                                                                                                                               | 50   | 1 |
| K02691                                                      | psaC                   | photosystem I subunit VII                                                              |                                        | Energy Metabolism                                                                                                                                                                                               | 10   | 1 |
| K02692                                                      | psaD                   | photosystem I subunit II                                                               |                                        | Energy Metabolism                                                                                                                                                                                               | 10   | 1 |
| K02693                                                      | psaE                   | photosystem I subunit IV                                                               |                                        | Energy Metabolism                                                                                                                                                                                               | 2    | 1 |
| K02694                                                      | psaF                   | photosystem I subunit III                                                              |                                        | Energy Metabolism                                                                                                                                                                                               | 4    | 1 |
| K02697                                                      | psaJ                   | photosystem I subunit IX                                                               |                                        | Energy Metabolism                                                                                                                                                                                               | 2    | 1 |
| K02703                                                      | psbA                   | photosystem II P680 reaction center D1 protein                                         |                                        | Energy Metabolism                                                                                                                                                                                               | 334  | 6 |
| K02704                                                      | psbB                   | photosystem II CP47 chlorophyll apoprotein                                             |                                        | Energy Metabolism                                                                                                                                                                                               | 1    | 1 |
| K02705                                                      | psbC                   | photosystem II CP43 chlorophyll apoprotein                                             |                                        | Energy Metabolism                                                                                                                                                                                               | 6    | 2 |
| K02706                                                      | psbD                   | photosystem II P680 reaction center D2 protein                                         |                                        | Energy Metabolism                                                                                                                                                                                               | 129  | 4 |
| ko00230_Purine metabolism                                   |                        |                                                                                        |                                        |                                                                                                                                                                                                                 |      |   |
| K00088                                                      | E1.1.1.205, guaB       | IMP dehydrogenase                                                                      | [EC:1.1.1.205]                         | Nucleotide Metabolism - Xenobiotics Biodegradation and Metabolism                                                                                                                                               | 57   | 4 |
| K00364                                                      | E1.1.1.7, guaC         | GMP reductase                                                                          | [EC:1.1.1.7]                           | Nucleotide Metabolism                                                                                                                                                                                           | 74   | 5 |
| K00524                                                      | E1.17.4.1              | ribonucleotide reductase, class II                                                     | [EC:1.17.4.1]                          | Nucleotide Metabolism                                                                                                                                                                                           | 3    | 2 |
| K00525                                                      | E1.17.4.1A, nrdA, nrdE | ribonucleoside-diphosphate reductase alpha chain                                       | [EC:1.17.4.1]                          | Nucleotide Metabolism - Replication and Repair                                                                                                                                                                  | 3331 | 9 |
| K00526                                                      | E1.17.4.1B, nrdB, nrdF | ribonucleoside-diphosphate reductase beta chain                                        | [EC:1.17.4.1]                          | Nucleotide Metabolism - Replication and Repair                                                                                                                                                                  | 869  | 8 |
| K00527                                                      | nrdD                   | ribonucleoside-triphosphate reductase                                                  | [EC:1.17.4.2]                          | Nucleotide Metabolism                                                                                                                                                                                           | 57   | 7 |
| K00759                                                      | E2.4.2.7, apt          | adenine phosphoribosyltransferase                                                      | [EC:2.4.2.7]                           | Nucleotide Metabolism                                                                                                                                                                                           | 5    | 2 |
| K00760                                                      | E2.4.2.8, hpt          | hypoxanthine phosphoribosyltransferase                                                 | [EC:2.4.2.8]                           | Nucleotide Metabolism - Xenobiotics Biodegradation and Metabolism                                                                                                                                               | 62   | 4 |
| K00764                                                      | E2.4.2.14, purF        | amidophosphoribosyltransferase                                                         | [EC:2.4.2.14]                          | Enzyme Families - Nucleotide Metabolism - Amino Acid Metabolism                                                                                                                                                 | 2    | 2 |
| K00860                                                      | cysC                   | adenylsulfate kinase                                                                   | [EC:2.7.1.25]                          | Nucleotide Metabolism - Energy Metabolism                                                                                                                                                                       | 165  | 4 |
| K00939                                                      | E2.7.4.3, adk          | adenylate kinase                                                                       | [EC:2.7.4.3]                           | Nucleotide Metabolism                                                                                                                                                                                           | 15   | 3 |
| K00940                                                      | E2.7.4.6, ndk          | nucleoside-diphosphate kinase                                                          | [EC:2.7.4.6]                           | Nucleotide Metabolism                                                                                                                                                                                           | 2    | 1 |
| K00942                                                      | E2.7.4.8, gmk          | guanylate kinase                                                                       | [EC:2.7.4.8]                           | Nucleotide Metabolism                                                                                                                                                                                           | 1    | 1 |
| K00948                                                      | PRPs, prsA             | ribose-phosphate pyrophosphokinase                                                     | [EC:2.7.6.1]                           | Carbohydrate Metabolism - Nucleotide Metabolism                                                                                                                                                                 | 9    | 6 |
| K00951                                                      | relA                   | GTP pyrophosphokinase                                                                  | [EC:2.7.6.5]                           | Nucleotide Metabolism                                                                                                                                                                                           | 3    | 2 |
| K00965                                                      | cysNC                  | bifunctional enzyme CysN/CysC                                                          | [EC:2.7.7.4 2.7.1.25]                  | Metabolism of Other Amino Acids - Nucleotide Metabolism - Energy Metabolism                                                                                                                                     | 2    | 2 |

|                                                     |                        |                                                                                                       |                                                                                                                 |      |   |
|-----------------------------------------------------|------------------------|-------------------------------------------------------------------------------------------------------|-----------------------------------------------------------------------------------------------------------------|------|---|
| K00957                                              | cysD                   | sulfate adenylyltransferase subunit 2 [EC:2.7.7.4]                                                    | Metabolism of Other Amino Acids - Nucleotide Metabolism - Energy Metabolism                                     | 2    | 2 |
| K00962                                              | prp, PNPT1             | polyribonucleotide nucleotidyltransferase [EC:2.7.7.8]                                                | Folding, Sorting and Degradation - Nucleotide Metabolism                                                        | 1    | 1 |
| K01081                                              | E3.1.3.5               | 5'-nucleotidase [EC:3.1.3.5]                                                                          | Signaling Molecules and Interaction - Metabolism of Cofactors and Vitamins - Nucleotide Metabolism              | 3    | 3 |
| K01428                                              | ureC                   | urease subunit alpha [EC:3.5.1.5]                                                                     | Infectious Diseases - Nucleotide Metabolism - Xenobiotics Biodegradation and Metabolism - Amino Acid Metabolism | 2    | 1 |
| K01429                                              | ureB                   | urease subunit beta [EC:3.5.1.5]                                                                      | Nucleotide Metabolism - Xenobiotics Biodegradation and Metabolism - Amino Acid Metabolism                       | 1    | 1 |
| K01486                                              | ade                    | adenine deaminase [EC:3.5.4.2]                                                                        | Nucleotide Metabolism                                                                                           | 1    | 1 |
| K01515                                              | nudF                   | ADP-ribose pyrophosphatase [EC:3.6.1.13]                                                              | Nucleotide Metabolism                                                                                           | 1    | 1 |
| K01524                                              | ppx-gppA               | exopolyphosphatase / guanosine-5'-triphosphate, 3'-diphosphate pyrophosphatase [EC:3.6.1.11;3.6.1.40] | Nucleotide Metabolism                                                                                           | 1    | 1 |
| K01588                                              | purE                   | 5-(carboxyamino)imidazole ribonucleotide mutase [EC:5.4.99.18]                                        | Nucleotide Metabolism                                                                                           | 1    | 1 |
| K01756                                              | E4.3.2.2, purB         | adenylosuccinate lyase [EC:4.3.2.2]                                                                   | Nucleotide Metabolism - Amino Acid Metabolism                                                                   | 3    | 3 |
| K01768                                              | E4.6.1.1               | adenylate cyclase [EC:4.6.1.1]                                                                        | Nucleotide Metabolism - Cell Growth and Death                                                                   | 61   | 5 |
| K01923                                              | purC                   | phosphoribosylaminimidazole-succinocarboxamide synthase [EC:6.3.2.6]                                  | Nucleotide Metabolism                                                                                           | 1    | 1 |
| K01933                                              | purM                   | phosphoribosylformylglycinamide cyclo-ligase [EC:6.3.3.1]                                             | Nucleotide Metabolism                                                                                           | 7    | 2 |
| K01939                                              | E6.3.4.4, purA         | adenylosuccinate synthase [EC:6.3.4.4]                                                                | Nucleotide Metabolism - Amino Acid Metabolism                                                                   | 47   | 6 |
| K01945                                              | purD                   | phosphoribosylamine-glycine ligase [EC:6.3.4.13]                                                      | Nucleotide Metabolism                                                                                           | 1    | 1 |
| K01951                                              | E6.3.5.2, guaA         | GMP synthase (glutamine-hydrolysing) [EC:6.3.5.2]                                                     | Enzyme Families - Nucleotide Metabolism - Xenobiotics Biodegradation and Metabolism                             | 1    | 1 |
| K01952                                              | E6.3.5.3, purL         | phosphoribosylformylglycinamide synthase [EC:6.3.5.3]                                                 | Nucleotide Metabolism                                                                                           | 1    | 1 |
| K02319                                              | DPA, polB1             | DNA polymerase I [EC:2.7.7.7]                                                                         | Nucleotide Metabolism - Replication and Repair                                                                  | 468  | 5 |
| K02322                                              | DPB1                   | DNA polymerase II large subunit [EC:2.7.7.7]                                                          | Nucleotide Metabolism - Replication and Repair                                                                  | 41   | 2 |
| K02323                                              | DPB2                   | DNA polymerase II small subunit [EC:2.7.7.7]                                                          | Nucleotide Metabolism - Replication and Repair                                                                  | 5    | 2 |
| K02335                                              | DPO1, polA             | DNA polymerase I [EC:2.7.7.7]                                                                         | Nucleotide Metabolism - Replication and Repair                                                                  | 921  | 8 |
| K02337                                              | DPO3A1, dnaE           | DNA polymerase III subunit alpha [EC:2.7.7.7]                                                         | Nucleotide Metabolism - Replication and Repair                                                                  | 178  | 7 |
| K02338                                              | DPO3B, dnaN            | DNA polymerase III subunit beta [EC:2.7.7.7]                                                          | Nucleotide Metabolism - Replication and Repair                                                                  | 18   | 2 |
| K02340                                              | DPO3D1, hoiA           | DNA polymerase III subunit delta [EC:2.7.7.7]                                                         | Nucleotide Metabolism - Replication and Repair                                                                  | 1    | 1 |
| K02341                                              | DPO3D2, hoiB           | DNA polymerase III subunit delta' [EC:2.7.7.7]                                                        | Nucleotide Metabolism - Replication and Repair                                                                  | 1    | 1 |
| K02342                                              | DPO3E, dnaQ            | DNA polymerase III subunit epsilon [EC:2.7.7.7]                                                       | Nucleotide Metabolism - Replication and Repair                                                                  | 16   | 3 |
| K02343                                              | DPO3G, dnaX            | DNA polymerase III subunit gamma/tau [EC:2.7.7.7]                                                     | Nucleotide Metabolism - Replication and Repair                                                                  | 13   | 3 |
| K03040                                              | rpoA                   | DNA-directed RNA polymerase subunit alpha [EC:2.7.7.6]                                                | Transcription - Nucleotide Metabolism - Replication and Repair                                                  | 40   | 7 |
| K03041                                              | rpoA1                  | DNA-directed RNA polymerase subunit A' [EC:2.7.7.6]                                                   | Transcription - Nucleotide Metabolism                                                                           | 5    | 2 |
| K03042                                              | rpoA2                  | DNA-directed RNA polymerase subunit A'' [EC:2.7.7.6]                                                  | Transcription - Nucleotide Metabolism                                                                           | 6    | 1 |
| K03043                                              | rpoB                   | DNA-directed RNA polymerase subunit beta [EC:2.7.7.6]                                                 | Transcription - Nucleotide Metabolism - Replication and Repair                                                  | 5    | 5 |
| K03044                                              | rpoB1                  | DNA-directed RNA polymerase subunit B' [EC:2.7.7.6]                                                   | Transcription - Nucleotide Metabolism                                                                           | 4    | 3 |
| K03045                                              | rpoB2                  | DNA-directed RNA polymerase subunit B'' [EC:2.7.7.6]                                                  | Transcription - Nucleotide Metabolism                                                                           | 2    | 1 |
| K03046                                              | rpoC                   | DNA-directed RNA polymerase subunit beta prime [EC:2.7.7.6]                                           | Transcription - Nucleotide Metabolism - Replication and Repair                                                  | 7    | 4 |
| K03053                                              | rpoH                   | DNA-directed RNA polymerase subunit H [EC:2.7.7.6]                                                    | Transcription - Nucleotide Metabolism                                                                           | 1    | 1 |
| K03056                                              | rpoL                   | DNA-directed RNA polymerase subunit L [EC:2.7.7.6]                                                    | Transcription - Nucleotide Metabolism                                                                           | 2    | 1 |
| K03060                                              | rpoZ                   | DNA-directed RNA polymerase subunit omega [EC:2.7.7.6]                                                | Transcription - Nucleotide Metabolism - Replication and Repair                                                  | 1    | 1 |
| K03763                                              | DPO3A2, polC           | DNA polymerase III subunit alpha, Gram-positive type [EC:2.7.7.7]                                     | Nucleotide Metabolism - Replication and Repair                                                                  | 9    | 3 |
| K03783                                              | purA                   | purine-nucleoside phosphorylase [EC:2.4.2.1]                                                          | Metabolism of Cofactors and Vitamins - Nucleotide Metabolism                                                    | 1    | 1 |
| K03784                                              | deoD                   | purine-nucleoside phosphorylase [EC:2.4.2.1]                                                          | Metabolism of Cofactors and Vitamins - Nucleotide Metabolism                                                    | 2    | 2 |
| K10807                                              | RRM1                   | ribonucleoside-diphosphate reductase subunit M1 [EC:1.17.4.1]                                         | Metabolism of Other Amino Acids - Nucleotide Metabolism - Replication and Repair                                | 83   | 4 |
| K10808                                              | RRM2                   | ribonucleoside-diphosphate reductase subunit M2 [EC:1.17.4.1]                                         | Metabolism of Other Amino Acids - Nucleotide Metabolism - Cell Growth and Death - Replication and Repair        | 67   | 5 |
| K11175                                              | purN                   | phosphoribosylglycinamide formyltransferase 1 [EC:2.1.2.2]                                            | Metabolism of Cofactors and Vitamins - Nucleotide Metabolism                                                    | 12   | 2 |
| K11177                                              | yagR                   | xanthine dehydrogenase YagR molybdenum-binding subunit [EC:1.17.1.4]                                  | Nucleotide Metabolism                                                                                           | 1    | 1 |
| K13798                                              | K13798, rpoB           | DNA-directed RNA polymerase subunit B [EC:2.7.7.6]                                                    | Transcription - Nucleotide Metabolism                                                                           | 3    | 2 |
| ko00240_Pyrimidine metabolism                       |                        |                                                                                                       |                                                                                                                 |      |   |
| K00226                                              | pyrD                   | dihydroorotate oxidase [EC:1.3.3.1]                                                                   | Nucleotide Metabolism                                                                                           | 1    | 1 |
| K00384                                              | E1.8.1.9, trxB         | thioredoxin reductase (NADPH) [EC:1.8.1.9]                                                            | Metabolism of Other Amino Acids - Nucleotide Metabolism                                                         | 4    | 2 |
| K00524                                              | E1.17.4.1              | ribonucleotide reductase, class II [EC:1.17.4.1]                                                      | Nucleotide Metabolism                                                                                           | 3    | 2 |
| K00525                                              | E1.17.4.1A, rdA, nrdE  | ribonucleoside-diphosphate reductase alpha chain [EC:1.17.4.1]                                        | Nucleotide Metabolism - Replication and Repair                                                                  | 3331 | 9 |
| K00526                                              | E1.17.4.1B, nrdB, nrdF | ribonucleoside-diphosphate reductase beta chain [EC:1.17.4.1]                                         | Nucleotide Metabolism - Replication and Repair                                                                  | 869  | 8 |
| K00527                                              | nrdD                   | ribonucleoside-triphosphate reductase [EC:1.17.4.2]                                                   | Nucleotide Metabolism                                                                                           | 57   | 7 |
| K00560                                              | E2.1.1.45, thyA        | thymidylate synthase [EC:2.1.1.45]                                                                    | Metabolism of Cofactors and Vitamins - Nucleotide Metabolism                                                    | 528  | 9 |
| K00762                                              | pyrE                   | orotate phosphoribosyltransferase [EC:2.4.2.10]                                                       | Nucleotide Metabolism                                                                                           | 20   | 2 |
| K00857                                              | E2.7.1.21, tdk         | thymidine kinase [EC:2.7.1.21]                                                                        | Nucleotide Metabolism - Xenobiotics Biodegradation and Metabolism                                               | 13   | 3 |
| K00940                                              | E2.7.4.6, ndk          | nucleoside-diphosphate kinase [EC:2.7.4.6]                                                            | Nucleotide Metabolism                                                                                           | 2    | 1 |
| K00943                                              | E2.7.4.9, tmk          | dTMP kinase [EC:2.7.4.9]                                                                              | Nucleotide Metabolism                                                                                           | 64   | 2 |
| K00945                                              | cmk                    | cytidylate kinase [EC:2.7.4.14]                                                                       | Nucleotide Metabolism                                                                                           | 2    | 2 |
| K00962                                              | prp, PNPT1             | polyribonucleotide nucleotidyltransferase [EC:2.7.7.8]                                                | Folding, Sorting and Degradation - Nucleotide Metabolism                                                        | 1    | 1 |
| K01081                                              | E3.1.3.5               | 5'-nucleotidase [EC:3.1.3.5]                                                                          | Signaling Molecules and Interaction - Metabolism of Cofactors and Vitamins - Nucleotide Metabolism              | 3    | 3 |
| K01465                                              | URA4, pyrC             | dihydroorotate [EC:3.5.2.3]                                                                           | Nucleotide Metabolism                                                                                           | 1    | 1 |
| K01493                                              | comEB                  | dCMP deaminase [EC:3.5.4.12]                                                                          | Nucleotide Metabolism - Membrane Transport                                                                      | 145  | 8 |
| K01494                                              | E3.5.4.13, dcd         | dCTP deaminase [EC:3.5.4.13]                                                                          | Nucleotide Metabolism                                                                                           | 588  | 5 |
| K01520                                              | E3.6.1.23, dut         | dUTP pyrophosphatase [EC:3.6.1.23]                                                                    | Nucleotide Metabolism - Replication and Repair                                                                  | 181  | 5 |
| K01591                                              | pyrF                   | orotidine-5'-phosphate decarboxylase [EC:4.1.1.23]                                                    | Nucleotide Metabolism                                                                                           | 3    | 1 |
| K01937                                              | E6.3.4.2, pyrG         | CTP synthase [EC:6.3.4.2]                                                                             | Nucleotide Metabolism                                                                                           | 1    | 1 |
| K01955                                              | carB, CPA2             | carbamoyl-phosphate synthase large subunit [EC:6.3.5.5]                                               | Nucleotide Metabolism - Amino Acid Metabolism                                                                   | 2    | 2 |
| K01956                                              | carA, CPA1             | carbamoyl-phosphate synthase small subunit [EC:6.3.5.5]                                               | Nucleotide Metabolism - Amino Acid Metabolism                                                                   | 2    | 1 |
| K02319                                              | DPA, polB1             | DNA polymerase I [EC:2.7.7.7]                                                                         | Nucleotide Metabolism - Replication and Repair                                                                  | 468  | 5 |
| K02322                                              | DPB1                   | DNA polymerase II large subunit [EC:2.7.7.7]                                                          | Nucleotide Metabolism - Replication and Repair                                                                  | 41   | 2 |
| K02323                                              | DPB2                   | DNA polymerase II small subunit [EC:2.7.7.7]                                                          | Nucleotide Metabolism - Replication and Repair                                                                  | 5    | 2 |
| K02335                                              | DPO1, polA             | DNA polymerase I [EC:2.7.7.7]                                                                         | Nucleotide Metabolism - Replication and Repair                                                                  | 921  | 8 |
| K02337                                              | DPO3A1, dnaE           | DNA polymerase III subunit alpha [EC:2.7.7.7]                                                         | Nucleotide Metabolism - Replication and Repair                                                                  | 178  | 7 |
| K02338                                              | DPO3B, dnaN            | DNA polymerase III subunit beta [EC:2.7.7.7]                                                          | Nucleotide Metabolism - Replication and Repair                                                                  | 18   | 2 |
| K02340                                              | DPO3D1, hoiA           | DNA polymerase III subunit delta [EC:2.7.7.7]                                                         | Nucleotide Metabolism - Replication and Repair                                                                  | 1    | 1 |
| K02341                                              | DPO3D2, hoiB           | DNA polymerase III subunit delta' [EC:2.7.7.7]                                                        | Nucleotide Metabolism - Replication and Repair                                                                  | 1    | 1 |
| K02342                                              | DPO3E, dnaQ            | DNA polymerase III subunit epsilon [EC:2.7.7.7]                                                       | Nucleotide Metabolism - Replication and Repair                                                                  | 16   | 3 |
| K02343                                              | DPO3G, dnaX            | DNA polymerase III subunit gamma/tau [EC:2.7.7.7]                                                     | Nucleotide Metabolism - Replication and Repair                                                                  | 13   | 3 |
| K02825                                              | pyrR                   | pyrimidine operon attenuation protein / uracil phosphoribosyltransferase [EC:2.4.2.9]                 | Transcription - Nucleotide Metabolism                                                                           | 1    | 1 |
| K03040                                              | rpoA                   | DNA-directed RNA polymerase subunit alpha [EC:2.7.7.6]                                                | Transcription - Nucleotide Metabolism - Replication and Repair                                                  | 40   | 7 |
| K03041                                              | rpoA1                  | DNA-directed RNA polymerase subunit A' [EC:2.7.7.6]                                                   | Transcription - Nucleotide Metabolism                                                                           | 5    | 2 |
| K03042                                              | rpoA2                  | DNA-directed RNA polymerase subunit A'' [EC:2.7.7.6]                                                  | Transcription - Nucleotide Metabolism                                                                           | 6    | 1 |
| K03043                                              | rpoB                   | DNA-directed RNA polymerase subunit beta [EC:2.7.7.6]                                                 | Transcription - Nucleotide Metabolism - Replication and Repair                                                  | 5    | 5 |
| K03044                                              | rpoB1                  | DNA-directed RNA polymerase subunit B' [EC:2.7.7.6]                                                   | Transcription - Nucleotide Metabolism                                                                           | 4    | 3 |
| K03045                                              | rpoB2                  | DNA-directed RNA polymerase subunit B'' [EC:2.7.7.6]                                                  | Transcription - Nucleotide Metabolism                                                                           | 2    | 1 |
| K03046                                              | rpoC                   | DNA-directed RNA polymerase subunit beta prime [EC:2.7.7.6]                                           | Transcription - Nucleotide Metabolism - Replication and Repair                                                  | 7    | 4 |
| K03053                                              | rpoH                   | DNA-directed RNA polymerase subunit H [EC:2.7.7.6]                                                    | Transcription - Nucleotide Metabolism                                                                           | 1    | 1 |
| K03056                                              | rpoL                   | DNA-directed RNA polymerase subunit L [EC:2.7.7.6]                                                    | Transcription - Nucleotide Metabolism                                                                           | 2    | 1 |
| K03060                                              | rpoZ                   | DNA-directed RNA polymerase subunit omega [EC:2.7.7.6]                                                | Transcription - Nucleotide Metabolism - Replication and Repair                                                  | 1    | 1 |
| K03465                                              | E2.1.1.148, thyX, thy1 | thymidylate synthase (FAD) [EC:2.1.1.148]                                                             | Metabolism of Cofactors and Vitamins - Nucleotide Metabolism                                                    | 1150 | 7 |
| K03763                                              | DPO3A2, polC           | DNA polymerase III subunit alpha, Gram-positive type [EC:2.7.7.7]                                     | Nucleotide Metabolism - Replication and Repair                                                                  | 9    | 3 |
| K03783                                              | purA                   | purine-nucleoside phosphorylase [EC:2.4.2.1]                                                          | Metabolism of Cofactors and Vitamins - Nucleotide Metabolism                                                    | 1    | 1 |
| K03784                                              | deoD                   | purine-nucleoside phosphorylase [EC:2.4.2.1]                                                          | Metabolism of Cofactors and Vitamins - Nucleotide Metabolism                                                    | 2    | 2 |
| K09903                                              | pyrH                   | uridylylate kinase [EC:2.7.4.22]                                                                      | Nucleotide Metabolism                                                                                           | 1    | 1 |
| K10807                                              | RRM1                   | ribonucleoside-diphosphate reductase subunit M1 [EC:1.17.4.1]                                         | Metabolism of Other Amino Acids - Nucleotide Metabolism - Replication and Repair                                | 83   | 4 |
| K10808                                              | RRM2                   | ribonucleoside-diphosphate reductase subunit M2 [EC:1.17.4.1]                                         | Metabolism of Other Amino Acids - Nucleotide Metabolism - Cell Growth and Death - Replication and Repair        | 67   | 5 |
| K13421                                              | UMPS                   | uridine monophosphate synthetase [EC:2.4.2.10;4.1.1.23]                                               | Nucleotide Metabolism - Xenobiotics Biodegradation and Metabolism                                               | 1    | 1 |
| K13798                                              | K13798, rpoB           | DNA-directed RNA polymerase subunit B [EC:2.7.7.6]                                                    | Transcription - Nucleotide Metabolism                                                                           | 3    | 2 |
| ko00250_Alanine, aspartate and glutamate metabolism |                        |                                                                                                       |                                                                                                                 |      |   |
| K00135                                              | E1.2.1.16, gabD        | succinate-semialdehyde dehydrogenase (NADP+) [EC:1.2.1.16]                                            | Carbohydrate Metabolism - Amino Acid Metabolism                                                                 | 2    | 1 |
| K00261                                              | E1.4.1.3               | glutamate dehydrogenase (NAD(P+)) [EC:1.4.1.3]                                                        | Metabolism of Other Amino Acids - Excretory System - Amino Acid Metabolism - Energy Metabolism                  | 3    | 2 |
| K00285                                              | glbB                   | glutamate synthase (NADPH/NADH) large chain [EC:1.4.1.13;1.4.1.14]                                    | Amino Acid Metabolism - Energy Metabolism                                                                       | 3    | 3 |

|                                                    |                       |                                                                                                                                                   |                                                                                                                                                                                                                 |      |   |
|----------------------------------------------------|-----------------------|---------------------------------------------------------------------------------------------------------------------------------------------------|-----------------------------------------------------------------------------------------------------------------------------------------------------------------------------------------------------------------|------|---|
| K00266                                             | gld                   | glutamate synthase (NADPH/NADH) small chain [EC:1.4.1.13 1.4.1.14]                                                                                | Amino Acid Metabolism - Energy Metabolism                                                                                                                                                                       | 1    | 1 |
| K00278                                             | nadB                  | L-aspartate oxidase [EC:1.4.3.16]                                                                                                                 | Metabolism of Cofactors and Vitamins - Amino Acid Metabolism                                                                                                                                                    | 1    | 1 |
| K00294                                             | E1.5.1.12             | 1-pyrroline-5-carboxylate dehydrogenase [EC:1.5.1.12]                                                                                             | Amino Acid Metabolism                                                                                                                                                                                           | 1    | 1 |
| K00764                                             | E2.4.2.14, purF       | amidophosphoribosyltransferase [EC:2.4.2.14]                                                                                                      | Enzyme Families - Nucleotide Metabolism - Amino Acid Metabolism                                                                                                                                                 | 2    | 2 |
| K00812                                             | E2.6.1.1A, aspB       | aspartate aminotransferase [EC:2.6.1.1]                                                                                                           | Biosynthesis of Other Secondary Metabolites - Amino Acid Metabolism - Energy Metabolism                                                                                                                         | 46   | 3 |
| K00820                                             | E2.6.1.16, glmS       | glucosamine-fructose-6-phosphate aminotransferase (isomerizing) [EC:2.6.1.16]                                                                     | Carbohydrate Metabolism - Enzyme Families - Amino Acid Metabolism                                                                                                                                               | 20   | 4 |
| K00823                                             | puuE                  | 4-aminobutyrate aminotransferase [EC:2.6.1.19]                                                                                                    | Carbohydrate Metabolism - Metabolism of Other Amino Acids - Amino Acid Metabolism                                                                                                                               | 1    | 1 |
| K01424                                             | E3.5.1.1, ansA, ansB  | L-asparaginase [EC:3.5.1.1]                                                                                                                       | Metabolism of Other Amino Acids - Amino Acid Metabolism - Energy Metabolism                                                                                                                                     | 1    | 1 |
| K01755                                             | argH, ASL             | argininosuccinate lyase [EC:4.3.2.1]                                                                                                              | Amino Acid Metabolism                                                                                                                                                                                           | 6    | 1 |
| K01756                                             | E4.3.2.2, purB        | adenylosuccinate lyase [EC:4.3.2.2]                                                                                                               | Nucleotide Metabolism - Amino Acid Metabolism                                                                                                                                                                   | 3    | 3 |
| K01779                                             | E5.1.1.13             | aspartate racemase [EC:5.1.1.13]                                                                                                                  | Amino Acid Metabolism                                                                                                                                                                                           | 1    | 1 |
| K01915                                             | E6.3.1.2, glnA        | glutamine synthetase [EC:6.3.1.2]                                                                                                                 | Signal Transduction - Nervous System - Amino Acid Metabolism - Energy Metabolism                                                                                                                                | 113  | 7 |
| K01939                                             | E6.3.4.4, purA        | adenylosuccinate synthase [EC:6.3.4.4]                                                                                                            | Nucleotide Metabolism - Amino Acid Metabolism                                                                                                                                                                   | 47   | 6 |
| K01953                                             | E6.3.5.4, asnB        | asparagine synthase (glutamine-hydrolysing) [EC:6.3.5.4]                                                                                          | Enzyme Families - Amino Acid Metabolism - Energy Metabolism                                                                                                                                                     | 14   | 2 |
| K01955                                             | carB, CPA2            | carbamoyl-phosphate synthase large subunit [EC:6.3.5.5]                                                                                           | Nucleotide Metabolism - Amino Acid Metabolism                                                                                                                                                                   | 2    | 2 |
| K01956                                             | carA, CPA1            | carbamoyl-phosphate synthase small subunit [EC:6.3.5.5]                                                                                           | Nucleotide Metabolism - Amino Acid Metabolism                                                                                                                                                                   | 2    | 1 |
| K07250                                             | gabT                  | 4-aminobutyrate aminotransferase / (S)-3-amino-2-methylpropionate transaminase [EC:2.6.1.19 2.6.1.22]                                             | Carbohydrate Metabolism - Metabolism of Other Amino Acids - Amino Acid Metabolism                                                                                                                               | 1    | 1 |
| K13821                                             | puA                   | proline dehydrogenase / delta 1-pyrroline-5-carboxylate dehydrogenase [EC:1.5.99.9 1.5.1.12]                                                      | Amino Acid Metabolism                                                                                                                                                                                           | 2    | 1 |
| ko00253_Tetracycline biosynthesis                  |                       |                                                                                                                                                   |                                                                                                                                                                                                                 |      |   |
| K01962                                             | accA                  | acetyl-CoA carboxylase carboxyl transferase subunit alpha [EC:6.4.1.2]                                                                            | Carbohydrate Metabolism - Metabolism of Terpenoids and Polyketides - Lipid Metabolism - Energy Metabolism                                                                                                       | 1    | 1 |
| K01963                                             | accD                  | acetyl-CoA carboxylase carboxyl transferase subunit beta [EC:6.4.1.2]                                                                             | Carbohydrate Metabolism - Metabolism of Terpenoids and Polyketides - Lipid Metabolism - Energy Metabolism                                                                                                       | 2    | 2 |
| ko00260_Glycine, serine and threonine metabolism   |                       |                                                                                                                                                   |                                                                                                                                                                                                                 |      |   |
| K00003                                             | E1.1.1.3              | homoserine dehydrogenase [EC:1.1.1.3]                                                                                                             | Amino Acid Metabolism                                                                                                                                                                                           | 1    | 1 |
| K00050                                             | E1.1.1.81, tuuD       | hydroxyppyruvate reductase [EC:1.1.1.81]                                                                                                          | Carbohydrate Metabolism - Amino Acid Metabolism                                                                                                                                                                 | 1    | 1 |
| K00058                                             | serA, PHGDH           | D-3-phosphoglycerate dehydrogenase [EC:1.1.1.95]                                                                                                  | Amino Acid Metabolism - Energy Metabolism                                                                                                                                                                       | 2    | 1 |
| K00130                                             | betB, gbsA            | betaine-aldehyde dehydrogenase [EC:1.2.1.8]                                                                                                       | Amino Acid Metabolism                                                                                                                                                                                           | 1    | 1 |
| K00273                                             | E1.4.3.3, DAO         | D-amino-acid oxidase [EC:1.4.3.3]                                                                                                                 | Metabolism of Other Amino Acids - Biosynthesis of Other Secondary Metabolites - Transport and Catabolism - Amino Acid Metabolism                                                                                | 2    | 1 |
| K00281                                             | GLDC, gcvP            | glycine dehydrogenase [EC:1.4.4.2]                                                                                                                | Amino Acid Metabolism                                                                                                                                                                                           | 10   | 3 |
| K00282                                             | gcvPA                 | glycine dehydrogenase subunit 1 [EC:1.4.4.2]                                                                                                      | Amino Acid Metabolism                                                                                                                                                                                           | 1    | 1 |
| K00382                                             | DLD, lpd, pdhD        | dihydropyruvate dehydrogenase [EC:1.8.1.4]                                                                                                        | Carbohydrate Metabolism - Amino Acid Metabolism                                                                                                                                                                 | 1    | 1 |
| K00600                                             | E2.1.2.1, glyA        | glycine hydroxymethyltransferase [EC:2.1.2.1]                                                                                                     | Metabolism of Other Amino Acids - Metabolism of Cofactors and Vitamins - Amino Acid Metabolism - Energy Metabolism                                                                                              | 25   | 4 |
| K00605                                             | E2.1.2.10, gcvT       | aminomethyltransferase [EC:2.1.2.10]                                                                                                              | Metabolism of Cofactors and Vitamins - Amino Acid Metabolism - Energy Metabolism                                                                                                                                | 2    | 2 |
| K00613                                             | GATM                  | glycine amidinotransferase [EC:2.1.4.1]                                                                                                           | Amino Acid Metabolism                                                                                                                                                                                           | 5    | 3 |
| K00643                                             | E2.3.1.37, ALAS       | 5-aminolevulinic acid synthase [EC:2.3.1.37]                                                                                                      | Metabolism of Cofactors and Vitamins - Amino Acid Metabolism                                                                                                                                                    | 7    | 4 |
| K00831                                             | serC, PSAT1           | phosphoserine aminotransferase [EC:2.6.1.52]                                                                                                      | Metabolism of Cofactors and Vitamins - Amino Acid Metabolism - Energy Metabolism                                                                                                                                | 2    | 1 |
| K00836                                             | E2.6.1.76, ectB       | diaminobutyrate-2-oxoglutarate transaminase [EC:2.6.1.76]                                                                                         | Amino Acid Metabolism                                                                                                                                                                                           | 2    | 1 |
| K00928                                             | E2.7.2.4, lysC        | aspartate kinase [EC:2.7.2.4]                                                                                                                     | Amino Acid Metabolism                                                                                                                                                                                           | 1    | 1 |
| K00998                                             | E2.7.8.8, pssA        | phosphatidylserine synthase [EC:2.7.8.8]                                                                                                          | Amino Acid Metabolism - Lipid Metabolism                                                                                                                                                                        | 2    | 2 |
| K01079                                             | serB, PSPH            | phosphoserine phosphatase [EC:3.1.3.3]                                                                                                            | Amino Acid Metabolism - Energy Metabolism                                                                                                                                                                       | 4    | 3 |
| K01620                                             | E4.1.2.5, ltaA        | threonine aldolase [EC:4.1.2.5]                                                                                                                   | Amino Acid Metabolism                                                                                                                                                                                           | 1    | 1 |
| K01696                                             | E4.2.1.20B, trpB      | tryptophan synthase beta chain [EC:4.2.1.20B]                                                                                                     | Amino Acid Metabolism                                                                                                                                                                                           | 1    | 1 |
| K01697                                             | E4.2.1.22, CBS        | cystathionine beta-synthase [EC:4.2.1.22]                                                                                                         | Amino Acid Metabolism                                                                                                                                                                                           | 1    | 1 |
| K01754                                             | E4.3.1.19, ltaA, tdcB | threonine dehydratase [EC:4.3.1.19]                                                                                                               | Amino Acid Metabolism                                                                                                                                                                                           | 3    | 2 |
| K02203                                             | thrH                  | phosphoserine / homoserine phosphotransferase [EC:3.1.3.3 2.7.1.39]                                                                               | Amino Acid Metabolism - Energy Metabolism                                                                                                                                                                       | 1    | 1 |
| K02204                                             | E2.7.1.39B, thrB      | homoserine kinase type II [EC:2.7.1.39]                                                                                                           | Amino Acid Metabolism                                                                                                                                                                                           | 1    | 1 |
| K06720                                             | ectC                  | L-ectoine synthase [EC:4.2.1.108]                                                                                                                 | Amino Acid Metabolism                                                                                                                                                                                           | 19   | 1 |
| K13745                                             | ddc                   | L-2,4-diaminobutyrate decarboxylase [EC:4.1.1.86]                                                                                                 | Amino Acid Metabolism                                                                                                                                                                                           | 1    | 1 |
| ko00270_Cysteine and methionine metabolism         |                       |                                                                                                                                                   |                                                                                                                                                                                                                 |      |   |
| K00003                                             | E1.1.1.3              | homoserine dehydrogenase [EC:1.1.1.3]                                                                                                             | Amino Acid Metabolism                                                                                                                                                                                           | 1    | 1 |
| K00548                                             | E2.1.1.13, methF      | 5-methyltetrahydrofolate-homocysteine methyltransferase [EC:2.1.1.13]                                                                             | Metabolism of Other Amino Acids - Metabolism of Cofactors and Vitamins - Amino Acid Metabolism                                                                                                                  | 23   | 5 |
| K00558                                             | E2.1.1.37, DNMT, dcm  | DNA (cytosine-5-)-methyltransferase [EC:2.1.1.37]                                                                                                 | Replication and Repair - Amino Acid Metabolism                                                                                                                                                                  | 2547 | 9 |
| K00640                                             | E2.3.1.30, cystE      | serine O-acetyltransferase [EC:2.3.1.30]                                                                                                          | Amino Acid Metabolism - Energy Metabolism                                                                                                                                                                       | 2    | 2 |
| K00641                                             | E2.3.1.31, metX       | homoserine O-acetyltransferase [EC:2.3.1.31]                                                                                                      | Amino Acid Metabolism - Energy Metabolism                                                                                                                                                                       | 1    | 1 |
| K00789                                             | E2.5.1.6, metK        | S-adenosylmethionine synthetase [EC:2.5.1.6]                                                                                                      | Amino Acid Metabolism                                                                                                                                                                                           | 13   | 4 |
| K00797                                             | E2.5.1.16, SRM, speE  | spermidine synthase [EC:2.5.1.16]                                                                                                                 | Metabolism of Other Amino Acids - Amino Acid Metabolism                                                                                                                                                         | 1    | 1 |
| K00812                                             | E2.6.1.1A, aspB       | aspartate aminotransferase [EC:2.6.1.1]                                                                                                           | Biosynthesis of Other Secondary Metabolites - Amino Acid Metabolism - Energy Metabolism                                                                                                                         | 46   | 3 |
| K00928                                             | E2.7.2.4, lysC        | aspartate kinase [EC:2.7.2.4]                                                                                                                     | Amino Acid Metabolism                                                                                                                                                                                           | 1    | 1 |
| K01243                                             | mtnN, mtn, pfs        | S-adenosylhomocysteine/5'-methylthioadenosine nucleosidase [EC:3.2.2.9]                                                                           | Amino Acid Metabolism                                                                                                                                                                                           | 1    | 1 |
| K01251                                             | E3.3.1.1, ahcY        | adenosylhomocysteinease [EC:3.3.1.1]                                                                                                              | Amino Acid Metabolism                                                                                                                                                                                           | 5    | 2 |
| K01611                                             | E4.1.1.50, speD       | S-adenosylmethionine decarboxylase [EC:4.1.1.50]                                                                                                  | Amino Acid Metabolism                                                                                                                                                                                           | 100  | 5 |
| K01697                                             | E4.2.1.22, CBS        | cystathionine beta-synthase [EC:4.2.1.22]                                                                                                         | Amino Acid Metabolism                                                                                                                                                                                           | 1    | 1 |
| K01738                                             | cysK                  | cysteine synthase A [EC:2.5.1.47]                                                                                                                 | Amino Acid Metabolism - Energy Metabolism                                                                                                                                                                       | 30   | 5 |
| K01740                                             | E2.5.1.49, metY       | O-acetylhomoserine (thiol)-lyase [EC:2.5.1.49]                                                                                                    | Amino Acid Metabolism                                                                                                                                                                                           | 4    | 2 |
| K01760                                             | metC                  | cystathionine beta-lyase [EC:4.4.1.8]                                                                                                             | Metabolism of Other Amino Acids - Amino Acid Metabolism - Energy Metabolism                                                                                                                                     | 2    | 1 |
| K07173                                             | luxS                  | S-ribosylhomocysteine lyase [EC:4.4.1.21]                                                                                                         | Infectious Diseases - Amino Acid Metabolism                                                                                                                                                                     | 1    | 1 |
| K08965                                             | mtnW                  | 2,3-diketo-5-methylthiopentyl-1-phosphate enolase [EC:3.1.3.77]                                                                                   | Amino Acid Metabolism                                                                                                                                                                                           | 1    | 1 |
| K10764                                             | metZ                  | O-succinylhomoserine sulphydrylase [EC:2.5.1.-]                                                                                                   | Amino Acid Metabolism                                                                                                                                                                                           | 1    | 1 |
| K12339                                             | cysM                  | cysteine synthase B [EC:2.5.1.47]                                                                                                                 | Amino Acid Metabolism - Energy Metabolism                                                                                                                                                                       | 5    | 2 |
| ko00280_Valine, leucine and isoleucine degradation |                       |                                                                                                                                                   |                                                                                                                                                                                                                 |      |   |
| K00128                                             | E1.2.1.3              | aldehyde dehydrogenase (NAD+) [EC:1.2.1.3]                                                                                                        | Carbohydrate Metabolism - Metabolism of Other Amino Acids - Xenobiotics Biodegradation and Metabolism - Metabolism of Terpenoids and Polyketides - Amino Acid Metabolism - Lipid Metabolism                     | 4    | 4 |
| K00140                                             | E1.2.1.27, mmsA, loa  | methylmalonate-semialdehyde dehydrogenase [EC:1.2.1.27]                                                                                           | Carbohydrate Metabolism - Amino Acid Metabolism                                                                                                                                                                 | 1    | 1 |
| K00167                                             | E1.2.4.4B, bkdA2      | 2-oxoisovalerate dehydrogenase E1 component, beta subunit [EC:1.2.4.4]                                                                            | Amino Acid Metabolism                                                                                                                                                                                           | 1    | 1 |
| K00249                                             | E1.3.99.3, ACADM, acd | acyl-CoA dehydrogenase [EC:1.3.99.3]                                                                                                              | Carbohydrate Metabolism - Metabolism of Other Amino Acids - Endocrine System - Amino Acid Metabolism - Lipid Metabolism                                                                                         | 1    | 1 |
| K00382                                             | DLD, lpd, pdhD        | dihydropyruvate dehydrogenase [EC:1.8.1.4]                                                                                                        | Carbohydrate Metabolism - Amino Acid Metabolism                                                                                                                                                                 | 1    | 1 |
| K00626                                             | E2.3.1.9, atoB        | acetyl-CoA C-acyltransferase [EC:2.3.1.9]                                                                                                         | Carbohydrate Metabolism - Signal Transduction - Xenobiotics Biodegradation and Metabolism - Metabolism of Terpenoids and Polyketides - Amino Acid Metabolism - Lipid Metabolism - Energy Metabolism             | 4    | 3 |
| K00826                                             | E2.6.1.42, lve        | branched-chain amino acid aminotransferase [EC:2.6.1.42]                                                                                          | Metabolism of Cofactors and Vitamins - Amino Acid Metabolism                                                                                                                                                    | 3    | 2 |
| K01640                                             | E4.1.3.4, HMGCL, hmgL | hydroxymethylglutaryl-CoA lyase [EC:4.1.3.4]                                                                                                      | Carbohydrate Metabolism - Transport and Catabolism - Metabolism of Terpenoids and Polyketides - Amino Acid Metabolism - Lipid Metabolism                                                                        | 18   | 1 |
| K01692                                             | E4.2.1.17, paaG       | enoyl-CoA hydratase [EC:4.2.1.17]                                                                                                                 | Carbohydrate Metabolism - Metabolism of Other Amino Acids - Xenobiotics Biodegradation and Metabolism - Metabolism of Terpenoids and Polyketides - Amino Acid Metabolism - Lipid Metabolism                     | 33   | 3 |
| K01825                                             | fadB                  | 3-hydroxyacyl-CoA dehydrogenase / enoyl-CoA hydratase / 3-hydroxybutyryl-CoA epimerase / enoyl-CoA isomerase [EC:1.1.35 4.2.1.17 5.1.2.3 5.3.3.8] | Carbohydrate Metabolism - Metabolism of Other Amino Acids - Xenobiotics Biodegradation and Metabolism - Metabolism of Terpenoids and Polyketides - Amino Acid Metabolism - Lipid Metabolism - Energy Metabolism | 1    | 1 |
| K01847                                             | MUT                   | methylmalonyl-CoA mutase [EC:5.4.99.2]                                                                                                            | Carbohydrate Metabolism - Amino Acid Metabolism - Energy Metabolism                                                                                                                                             | 2    | 2 |
| K01848                                             | E5.4.99.2A, mcmA1     | methylmalonyl-CoA mutase, N-terminal domain [EC:5.4.99.2]                                                                                         | Carbohydrate Metabolism - Amino Acid Metabolism - Energy Metabolism                                                                                                                                             | 1    | 1 |
| K01969                                             | E6.4.1.4B             | 3-methylcrotonyl-CoA carboxylase beta subunit [EC:6.4.1.4]                                                                                        | Amino Acid Metabolism                                                                                                                                                                                           | 1    | 1 |
| K07250                                             | gabT                  | 4-aminobutyrate aminotransferase / (S)-3-amino-2-methylpropionate transaminase [EC:2.6.1.19 2.6.1.22]                                             | Carbohydrate Metabolism - Metabolism of Other Amino Acids - Amino Acid Metabolism                                                                                                                               | 1    | 1 |
| K11381                                             | E1.2.4.4C, bkdA       | 2-oxoisovalerate dehydrogenase E1 component [EC:1.2.4.4]                                                                                          | Amino Acid Metabolism                                                                                                                                                                                           | 6    | 2 |
| ko00281_Geraniol degradation                       |                       |                                                                                                                                                   |                                                                                                                                                                                                                 |      |   |
| K00257                                             | E1.3.99 -             |                                                                                                                                                   | Xenobiotics Biodegradation and Metabolism - Metabolism of Terpenoids and Polyketides                                                                                                                            | 2    | 2 |
| K01640                                             | E4.1.3.4, HMGCL, hmgL | hydroxymethylglutaryl-CoA lyase [EC:4.1.3.4]                                                                                                      | Carbohydrate Metabolism - Transport and Catabolism - Metabolism of Terpenoids and Polyketides - Amino Acid Metabolism - Lipid Metabolism                                                                        | 18   | 1 |

|                                                     |                             |                                                                                                                                                   |                                                                                                                                                                                                                 |     |   |
|-----------------------------------------------------|-----------------------------|---------------------------------------------------------------------------------------------------------------------------------------------------|-----------------------------------------------------------------------------------------------------------------------------------------------------------------------------------------------------------------|-----|---|
| K01692                                              | E4.2.1.17, paag             | enoyl-CoA hydratase [EC:4.2.1.17]                                                                                                                 | Carbohydrate Metabolism - Metabolism of Other Amino Acids - Xenobiotics Biodegradation and Metabolism - Metabolism of Terpenoids and Polyketides - Amino Acid Metabolism - Lipid Metabolism                     | 33  | 3 |
| K01825                                              | fadB                        | 3-hydroxyacyl-CoA dehydrogenase / enoyl-CoA hydratase / 3-hydroxybutyryl-CoA epimerase / enoyl-CoA isomerase [EC:1.1.35.4.2.1.17.5.1.2.3.5.3.3.8] | Carbohydrate Metabolism - Metabolism of Other Amino Acids - Xenobiotics Biodegradation and Metabolism - Metabolism of Terpenoids and Polyketides - Amino Acid Metabolism - Lipid Metabolism - Energy Metabolism | 1   | 1 |
| ko00290_Valine, leucine and isoleucine biosynthesis |                             |                                                                                                                                                   |                                                                                                                                                                                                                 |     |   |
| K00053                                              | ivC                         | ketol-acid reductoisomerase [EC:1.1.1.86]                                                                                                         | Metabolism of Cofactors and Vitamins - Amino Acid Metabolism                                                                                                                                                    | 2   | 2 |
| K00161                                              | PDHA, pdhA                  | pyruvate dehydrogenase E1 component subunit alpha [EC:1.2.4.1]                                                                                    | Carbohydrate Metabolism - Amino Acid Metabolism                                                                                                                                                                 | 57  | 3 |
| K00162                                              | PDHB, pdhB                  | pyruvate dehydrogenase E1 component subunit beta [EC:1.2.4.1]                                                                                     | Carbohydrate Metabolism - Amino Acid Metabolism                                                                                                                                                                 | 37  | 3 |
| K00826                                              | E2.6.1.42, ivE              | branched-chain amino acid aminotransferase [EC:2.6.1.42]                                                                                          | Metabolism of Cofactors and Vitamins - Amino Acid Metabolism                                                                                                                                                    | 3   | 2 |
| K01649                                              | E2.3.3.13, leuA             | 2-isopropylmalate synthase [EC:2.3.3.13]                                                                                                          | Carbohydrate Metabolism - Amino Acid Metabolism                                                                                                                                                                 | 1   | 1 |
| K01652                                              | E2.2.1.6L, ivb, ivG, ivl    | acetylacetyl synthase I/III large subunit [EC:2.2.1.6]                                                                                            | Carbohydrate Metabolism - Metabolism of Cofactors and Vitamins - Amino Acid Metabolism                                                                                                                          | 300 | 5 |
| K01703                                              | leuC                        | 3-isopropylmalate(R)-2-methylmalate dehydratase large subunit [EC:4.2.1.33.4.2.1.35]                                                              | Carbohydrate Metabolism - Amino Acid Metabolism                                                                                                                                                                 | 2   | 2 |
| K01704                                              | leuD                        | 3-isopropylmalate(R)-2-methylmalate dehydratase small subunit [EC:4.2.1.33.4.2.1.35]                                                              | Carbohydrate Metabolism - Amino Acid Metabolism                                                                                                                                                                 | 1   | 1 |
| K01754                                              | E4.3.1.19, ivA, tdcB        | threonine dehydratase [EC:4.3.1.19]                                                                                                               | Amino Acid Metabolism                                                                                                                                                                                           | 3   | 2 |
| K01869                                              | LARS, leuS                  | leucyl-tRNA synthetase [EC:6.1.1.4]                                                                                                               | Translation - Amino Acid Metabolism                                                                                                                                                                             | 2   | 2 |
| K01870                                              | IARS, ileS                  | isoleucyl-tRNA synthetase [EC:6.1.1.5]                                                                                                            | Translation - Amino Acid Metabolism                                                                                                                                                                             | 3   | 2 |
| K01873                                              | VARS, valS                  | valyl-tRNA synthetase [EC:6.1.1.9]                                                                                                                | Translation - Amino Acid Metabolism                                                                                                                                                                             | 3   | 2 |
| ko00300_Lysine biosynthesis                         |                             |                                                                                                                                                   |                                                                                                                                                                                                                 |     |   |
| K00003                                              | E1.1.1.3                    | homoserine dehydrogenase [EC:1.1.1.3]                                                                                                             | Amino Acid Metabolism                                                                                                                                                                                           | 1   | 1 |
| K00145                                              | argC                        | N-acetyl-gamma-glutamyl-phosphate/N-acetyl-gamma-aminoadipyl-phosphate reductase [EC:1.2.1.38.1.2.1.1]                                            | Amino Acid Metabolism                                                                                                                                                                                           | 1   | 1 |
| K00215                                              | dapB                        | dihydrodipicolinate reductase [EC:1.3.1.26]                                                                                                       | Amino Acid Metabolism                                                                                                                                                                                           | 1   | 1 |
| K00674                                              | dapD                        | 2,3,4,5-tetrahydropyridine-2-carboxylate N-succinyltransferase [EC:2.3.1.117]                                                                     | Amino Acid Metabolism                                                                                                                                                                                           | 4   | 2 |
| K00928                                              | E2.7.2.4, lysC              | aspartate kinase [EC:2.7.2.4]                                                                                                                     | Amino Acid Metabolism                                                                                                                                                                                           | 1   | 1 |
| K01439                                              | dapE                        | succinyl-diaminopimelate desuccinylase [EC:3.5.1.18]                                                                                              | Amino Acid Metabolism                                                                                                                                                                                           | 1   | 1 |
| K01586                                              | lysA                        | diaminopimelate decarboxylase [EC:4.1.1.20]                                                                                                       | Amino Acid Metabolism                                                                                                                                                                                           | 3   | 2 |
| K01714                                              | dapA                        | dihydrodipicolinate synthase [EC:4.2.1.52]                                                                                                        | Amino Acid Metabolism                                                                                                                                                                                           | 1   | 1 |
| K01778                                              | dapF                        | diaminopimelate epimerase [EC:5.1.1.7]                                                                                                            | Amino Acid Metabolism                                                                                                                                                                                           | 1   | 1 |
| K01929                                              | murF                        | UDP-N-acetylmuramoylalanyl-D-glutamyl-2,6-diaminopimelate-D-alanyl-D-alanine ligase [EC:3.3.2.10]                                                 | Glycan Biosynthesis and Metabolism - Amino Acid Metabolism                                                                                                                                                      | 1   | 1 |
| K03918                                              | lat                         | L-lysine 6-transaminase [EC:2.6.1.36]                                                                                                             | Amino Acid Metabolism                                                                                                                                                                                           | 2   | 2 |
| ko00310_Lysine degradation                          |                             |                                                                                                                                                   |                                                                                                                                                                                                                 |     |   |
| K00128                                              | E1.2.1.3                    | aldehyde dehydrogenase (NAD+) [EC:1.2.1.3]                                                                                                        | Carbohydrate Metabolism - Metabolism of Other Amino Acids - Xenobiotics Biodegradation and Metabolism - Metabolism of Terpenoids and Polyketides - Amino Acid Metabolism - Lipid Metabolism                     | 4   | 4 |
| K00164                                              | OGDH, sucA                  | 2-oxoglutarate dehydrogenase E1 component [EC:1.2.4.2]                                                                                            | Carbohydrate Metabolism - Amino Acid Metabolism                                                                                                                                                                 | 2   | 1 |
| K00626                                              | E2.3.1.9, atoB              | acetyl-CoA C-acetyltransferase [EC:2.3.1.9]                                                                                                       | Carbohydrate Metabolism - Signal Transduction - Xenobiotics Biodegradation and Metabolism - Metabolism of Terpenoids and Polyketides - Amino Acid Metabolism - Lipid Metabolism - Energy Metabolism             | 4   | 3 |
| K00658                                              | DLST, sucB                  | 2-oxoglutarate dehydrogenase E2 component (dihydroipoamide succinyltransferase) [EC:2.3.1.61]                                                     | Carbohydrate Metabolism - Amino Acid Metabolism                                                                                                                                                                 | 2   | 2 |
| K01423                                              | E3.4.--                     |                                                                                                                                                   | Metabolism of Cofactors and Vitamins - Amino Acid Metabolism                                                                                                                                                    | 7   | 4 |
| K01692                                              | E4.2.1.17, paag             | enoyl-CoA hydratase [EC:4.2.1.17]                                                                                                                 | Carbohydrate Metabolism - Metabolism of Other Amino Acids - Xenobiotics Biodegradation and Metabolism - Metabolism of Terpenoids and Polyketides - Amino Acid Metabolism - Lipid Metabolism                     | 33  | 3 |
| K01825                                              | fadB                        | 3-hydroxyacyl-CoA dehydrogenase / enoyl-CoA hydratase / 3-hydroxybutyryl-CoA epimerase / enoyl-CoA isomerase [EC:1.1.35.4.2.1.17.5.1.2.3.5.3.3.8] | Carbohydrate Metabolism - Metabolism of Other Amino Acids - Xenobiotics Biodegradation and Metabolism - Metabolism of Terpenoids and Polyketides - Amino Acid Metabolism - Lipid Metabolism - Energy Metabolism | 1   | 1 |
| K01843                                              | E5.4.3.2, kama              | lysine 2,3-aminomutase [EC:5.4.3.2]                                                                                                               | Amino Acid Metabolism                                                                                                                                                                                           | 2   | 1 |
| ko00311_Penicillin and cephalosporin biosynthesis   |                             |                                                                                                                                                   |                                                                                                                                                                                                                 |     |   |
| K00273                                              | E1.4.3.3, DAO               | D-amino-acid oxidase [EC:1.4.3.3]                                                                                                                 | Metabolism of Other Amino Acids - Biosynthesis of Other Secondary Metabolites - Transport and Catabolism - Amino Acid Metabolism                                                                                | 2   | 1 |
| K01434                                              | E3.5.1.11                   | penicillin amidase [EC:3.5.1.11]                                                                                                                  | Enzyme Families - Biosynthesis of Other Secondary Metabolites                                                                                                                                                   | 1   | 1 |
| K01467                                              | E3.5.2.6, ampC, penP        | beta-lactamase [EC:3.5.2.6]                                                                                                                       | Signal Transduction - Biosynthesis of Other Secondary Metabolites                                                                                                                                               | 1   | 1 |
| ko00312_beta-Lactam resistance                      |                             |                                                                                                                                                   |                                                                                                                                                                                                                 |     |   |
| K01467                                              | E3.5.2.6, ampC, penP        | beta-lactamase [EC:3.5.2.6]                                                                                                                       | Signal Transduction - Biosynthesis of Other Secondary Metabolites                                                                                                                                               | 1   | 1 |
| ko00330_Arginine and proline metabolism             |                             |                                                                                                                                                   |                                                                                                                                                                                                                 |     |   |
| K00128                                              | E1.2.1.3                    | aldehyde dehydrogenase (NAD+) [EC:1.2.1.3]                                                                                                        | Carbohydrate Metabolism - Metabolism of Other Amino Acids - Xenobiotics Biodegradation and Metabolism - Metabolism of Terpenoids and Polyketides - Amino Acid Metabolism - Lipid Metabolism                     | 4   | 4 |
| K00145                                              | argC                        | N-acetyl-gamma-glutamyl-phosphate/N-acetyl-gamma-aminoadipyl-phosphate reductase [EC:1.2.1.38.1.2.1.1]                                            | Amino Acid Metabolism                                                                                                                                                                                           | 1   | 1 |
| K00147                                              | proA                        | glutamate-5-semialdehyde dehydrogenase [EC:1.2.1.41]                                                                                              | Amino Acid Metabolism                                                                                                                                                                                           | 1   | 1 |
| K00261                                              | E1.4.1.3                    | glutamate dehydrogenase (NAD)(P+) [EC:1.4.1.3]                                                                                                    | Metabolism of Other Amino Acids - Excretory System - Amino Acid Metabolism - Energy Metabolism                                                                                                                  | 3   | 2 |
| K00273                                              | E1.4.3.3, DAO               | D-amino-acid oxidase [EC:1.4.3.3]                                                                                                                 | Metabolism of Other Amino Acids - Biosynthesis of Other Secondary Metabolites - Transport and Catabolism - Amino Acid Metabolism                                                                                | 2   | 1 |
| K00294                                              | E1.5.1.12                   | 1-pyrroline-5-carboxylate dehydrogenase [EC:1.5.1.12]                                                                                             | Amino Acid Metabolism                                                                                                                                                                                           | 1   | 1 |
| K00472                                              | E1.14.11.2                  | prolyl 4-hydroxylase [EC:1.14.11.2]                                                                                                               | Amino Acid Metabolism                                                                                                                                                                                           | 25  | 4 |
| K00613                                              | GATM                        | glycine aminotransferase [EC:2.1.4.1]                                                                                                             | Amino Acid Metabolism                                                                                                                                                                                           | 5   | 3 |
| K00797                                              | E2.5.1.16, SRM, speE        | spermidine synthase [EC:2.5.1.16]                                                                                                                 | Metabolism of Other Amino Acids - Amino Acid Metabolism                                                                                                                                                         | 1   | 1 |
| K00812                                              | E2.6.1.1A, aspB             | aspartate aminotransferase [EC:2.6.1.1]                                                                                                           | Biosynthesis of Other Secondary Metabolites - Amino Acid Metabolism - Energy Metabolism                                                                                                                         | 46  | 3 |
| K00931                                              | proB                        | glutamate 5-kinase [EC:2.7.2.11]                                                                                                                  | Amino Acid Metabolism                                                                                                                                                                                           | 2   | 2 |
| K01426                                              | E3.5.1.4, amE               | amidase [EC:3.5.1.4]                                                                                                                              | Metabolism of Other Amino Acids - Xenobiotics Biodegradation and Metabolism - Amino Acid Metabolism                                                                                                             | 3   | 1 |
| K01428                                              | ureC                        | urease subunit alpha [EC:3.5.1.5]                                                                                                                 | Infectious Diseases - Nucleotide Metabolism - Xenobiotics Biodegradation and Metabolism - Amino Acid Metabolism                                                                                                 | 2   | 1 |
| K01429                                              | ureB                        | urease subunit beta [EC:3.5.1.5]                                                                                                                  | Nucleotide Metabolism - Xenobiotics Biodegradation and Metabolism - Amino Acid Metabolism                                                                                                                       | 1   | 1 |
| K01438                                              | E3.5.1.16, argE             | acetylmethionine deacetylase [EC:3.5.1.16]                                                                                                        | Amino Acid Metabolism                                                                                                                                                                                           | 1   | 1 |
| K01476                                              | E3.5.3.11, rocF, arg        | arginase [EC:3.5.3.11]                                                                                                                            | Infectious Diseases - Amino Acid Metabolism                                                                                                                                                                     | 11  | 1 |
| K01480                                              | E3.5.3.11, speB             | agmatinase [EC:3.5.3.11]                                                                                                                          | Amino Acid Metabolism                                                                                                                                                                                           | 2   | 1 |
| K01581                                              | E4.1.1.17, ODC1, speC, speF | ornithine decarboxylase [EC:4.1.1.17]                                                                                                             | Metabolism of Other Amino Acids - Amino Acid Metabolism                                                                                                                                                         | 1   | 1 |
| K01611                                              | E4.1.1.50, speD             | S-adenosylmethionine decarboxylase [EC:4.1.1.50]                                                                                                  | Amino Acid Metabolism                                                                                                                                                                                           | 100 | 5 |
| K01750                                              | E4.3.1.12, ocd              | ornithine cyclodeaminase [EC:4.3.1.12]                                                                                                            | Amino Acid Metabolism                                                                                                                                                                                           | 1   | 1 |
| K01755                                              | argH, ASL                   | argininosuccinate lyase [EC:4.3.2.1]                                                                                                              | Amino Acid Metabolism                                                                                                                                                                                           | 6   | 1 |
| K01915                                              | E6.3.1.2, glnA              | glutamine synthetase [EC:6.3.1.2]                                                                                                                 | Signal Transduction - Nervous System - Amino Acid Metabolism - Energy Metabolism                                                                                                                                | 113 | 7 |
| K09251                                              | E2.6.1.82                   | putrescine aminotransferase [EC:2.6.1.82]                                                                                                         | Amino Acid Metabolism                                                                                                                                                                                           | 2   | 1 |
| K09472                                              | puuC, aldH                  | gamma-glutamyl-gamma-aminobutyraldehyde dehydrogenase [EC:1.2.1.-]                                                                                | Amino Acid Metabolism                                                                                                                                                                                           | 1   | 1 |
| K10536                                              | E3.5.3.12                   | agmatine deiminase [EC:3.5.3.12]                                                                                                                  | Amino Acid Metabolism                                                                                                                                                                                           | 2   | 1 |
| K13747                                              | nspC                        | carboxynorspermidine decarboxylase [EC:4.1.1.-]                                                                                                   | Amino Acid Metabolism                                                                                                                                                                                           | 1   | 1 |
| K13821                                              | putA                        | proline dehydrogenase / delta 1-pyrroline-5-carboxylate dehydrogenase [EC:1.5.99.8.1.5.1.12]                                                      | Amino Acid Metabolism                                                                                                                                                                                           | 2   | 1 |
| ko00340_Histidine metabolism                        |                             |                                                                                                                                                   |                                                                                                                                                                                                                 |     |   |
| K00013                                              | hisD                        | histidinol dehydrogenase [EC:1.1.1.23]                                                                                                            | Amino Acid Metabolism                                                                                                                                                                                           | 1   | 1 |
| K00128                                              | E1.2.1.3                    | aldehyde dehydrogenase (NAD+) [EC:1.2.1.3]                                                                                                        | Carbohydrate Metabolism - Metabolism of Other Amino Acids - Xenobiotics Biodegradation and Metabolism - Metabolism of Terpenoids and Polyketides - Amino Acid Metabolism - Lipid Metabolism                     | 4   | 4 |
| K00599                                              | E2.1.1.-                    |                                                                                                                                                   | Xenobiotics Biodegradation and Metabolism - Amino Acid Metabolism                                                                                                                                               | 55  | 3 |
| K00817                                              | hisC                        | histidinol-phosphate aminotransferase [EC:2.6.1.9]                                                                                                | Biosynthesis of Other Secondary Metabolites - Amino Acid Metabolism                                                                                                                                             | 6   | 3 |
| K01468                                              | E3.5.2.7, hutI              | imidazolonepropionase [EC:3.5.2.7]                                                                                                                | Amino Acid Metabolism                                                                                                                                                                                           | 1   | 1 |
| K01693                                              | E4.2.1.19, hisB             | imidazoleglycerol-phosphate dehydratase [EC:4.2.1.19]                                                                                             | Amino Acid Metabolism                                                                                                                                                                                           | 1   | 1 |

|                                                             |                  |                                                                                                                                                     |                                                                                                                                                                                                                 |    |   |
|-------------------------------------------------------------|------------------|-----------------------------------------------------------------------------------------------------------------------------------------------------|-----------------------------------------------------------------------------------------------------------------------------------------------------------------------------------------------------------------|----|---|
| K01814                                                      | E5.3.1.16, hisA  | phosphoribosylformimino-5-aminoimidazole carboxamide ribotide isomerase [EC:5.3.1.16]                                                               | Amino Acid Metabolism                                                                                                                                                                                           | 1  | 1 |
| K02500                                                      | hisF             | cyclase [EC:4.1.3.-]                                                                                                                                | Amino Acid Metabolism                                                                                                                                                                                           | 2  | 1 |
| K02501                                                      | hisH             | glutamine amidotransferase [EC:2.4.2.-]                                                                                                             | Amino Acid Metabolism                                                                                                                                                                                           | 1  | 1 |
| ko00350_Tyrosine metabolism                                 |                  |                                                                                                                                                     |                                                                                                                                                                                                                 |    |   |
| K00001                                                      | E1.1.1.1, adh    | alcohol dehydrogenase [EC:1.1.1.1]                                                                                                                  | Carbohydrate Metabolism - Metabolism of Cofactors and Vitamins - Xenobiotics Biodegradation and Metabolism - Amino Acid Metabolism - Lipid Metabolism                                                           | 1  | 1 |
| K00121                                                      | frmA, ADH5, adhC | S-(hydroxymethyl)glutathione dehydrogenase / alcohol dehydrogenase [EC:1.1.1.284 1.1.1.1]                                                           | Carbohydrate Metabolism - Metabolism of Cofactors and Vitamins - Xenobiotics Biodegradation and Metabolism - Amino Acid Metabolism - Lipid Metabolism - Energy Metabolism                                       | 8  | 3 |
| K00135                                                      | E1.2.1.16, gabD  | succinate-semialdehyde dehydrogenase (NADP+) [EC:1.2.1.16]                                                                                          | Carbohydrate Metabolism - Amino Acid Metabolism                                                                                                                                                                 | 2  | 1 |
| K00450                                                      | E1.13.11.4       | gentisate 1,2-dioxygenase [EC:1.13.11.4]                                                                                                            | Amino Acid Metabolism                                                                                                                                                                                           | 1  | 1 |
| K00599                                                      | E2.1.1.-         |                                                                                                                                                     | Xenobiotics Biodegradation and Metabolism - Amino Acid Metabolism                                                                                                                                               | 55 | 3 |
| K00680                                                      | E2.3.1.-         |                                                                                                                                                     | Xenobiotics Biodegradation and Metabolism - Metabolism of Terpenoids and Polyketides - Amino Acid Metabolism                                                                                                    | 9  | 1 |
| K00812                                                      | E2.6.1.1A, aspB  | aspartate aminotransferase [EC:2.6.1.1]                                                                                                             | Biosynthesis of Other Secondary Metabolites - Amino Acid Metabolism - Energy Metabolism                                                                                                                         | 46 | 3 |
| K00817                                                      | hisC             | histidinol-phosphate aminotransferase [EC:2.6.1.9]                                                                                                  | Biosynthesis of Other Secondary Metabolites - Amino Acid Metabolism                                                                                                                                             | 6  | 3 |
| K02510                                                      | hpaI             | 2,4-dihydroxyhept-2-ene-1,7-dioic acid aldolase [EC:4.1.2.-]                                                                                        | Amino Acid Metabolism                                                                                                                                                                                           | 2  | 2 |
| K13953                                                      | adhP             | alcohol dehydrogenase, propanol-preferring [EC:1.1.1.1]                                                                                             | Carbohydrate Metabolism - Metabolism of Cofactors and Vitamins - Xenobiotics Biodegradation and Metabolism - Amino Acid Metabolism - Lipid Metabolism                                                           | 1  | 1 |
| ko00360_Phenylalanine metabolism                            |                  |                                                                                                                                                     |                                                                                                                                                                                                                 |    |   |
| K00285                                                      | dadA             | D-amino-acid dehydrogenase [EC:1.4.99.1]                                                                                                            | Amino Acid Metabolism - Energy Metabolism                                                                                                                                                                       | 19 | 4 |
| K00529                                                      | hcaD             | ferredoxin-NAD+ reductase [EC:1.18.1.3]                                                                                                             | Xenobiotics Biodegradation and Metabolism - Amino Acid Metabolism - Lipid Metabolism                                                                                                                            | 1  | 1 |
| K00588                                                      | E2.1.1.104       | caffeoyl-CoA O-methyltransferase [EC:2.1.1.104]                                                                                                     | Biosynthesis of Other Secondary Metabolites - Amino Acid Metabolism                                                                                                                                             | 1  | 1 |
| K00812                                                      | E2.6.1.1A, aspB  | aspartate aminotransferase [EC:2.6.1.1]                                                                                                             | Biosynthesis of Other Secondary Metabolites - Amino Acid Metabolism - Energy Metabolism                                                                                                                         | 46 | 3 |
| K00817                                                      | hisC             | histidinol-phosphate aminotransferase [EC:2.6.1.9]                                                                                                  | Biosynthesis of Other Secondary Metabolites - Amino Acid Metabolism                                                                                                                                             | 6  | 3 |
| K01426                                                      | E3.5.1.4, amIE   | amidase [EC:3.5.1.4]                                                                                                                                | Metabolism of Other Amino Acids - Xenobiotics Biodegradation and Metabolism - Amino Acid Metabolism                                                                                                             | 3  | 1 |
| K01666                                                      | E4.1.3.39, mhpE  | 4-hydroxy 2-oxovalerate aldolase [EC:4.1.3.39]                                                                                                      | Xenobiotics Biodegradation and Metabolism - Amino Acid Metabolism                                                                                                                                               | 35 | 3 |
| K01912                                                      | E6.2.1.30, paak  | phenylacetate-CoA ligase [EC:6.2.1.30]                                                                                                              | Amino Acid Metabolism                                                                                                                                                                                           | 2  | 2 |
| K02554                                                      | mhpD             | 2-keto-4-pentenolate hydratase [EC:4.2.1.80]                                                                                                        | Xenobiotics Biodegradation and Metabolism - Amino Acid Metabolism                                                                                                                                               | 1  | 1 |
| K03782                                                      | katG             | catalase/peroxidase [EC:1.11.1.6 1.11.1.7]                                                                                                          | Biosynthesis of Other Secondary Metabolites - Amino Acid Metabolism - Energy Metabolism                                                                                                                         | 9  | 1 |
| K05709                                                      | hcaA2, hcaF      | small terminal subunit of phenylpropanoate dioxygenase [EC:1.14.12.19]                                                                              | Amino Acid Metabolism                                                                                                                                                                                           | 1  | 1 |
| ko00361_Chlorocyclohexane and chlorobenzene degradation     |                  |                                                                                                                                                     |                                                                                                                                                                                                                 |    |   |
| K01563                                                      | dhaA             | haloalkane dehalogenase [EC:3.8.1.5]                                                                                                                | Xenobiotics Biodegradation and Metabolism                                                                                                                                                                       | 1  | 1 |
| ko00362_Benzoate degradation                                |                  |                                                                                                                                                     |                                                                                                                                                                                                                 |    |   |
| K00626                                                      | E2.3.1.9, atoB   | acetyl-CoA C-acetyltransferase [EC:2.3.1.9]                                                                                                         | Carbohydrate Metabolism - Signal Transduction - Xenobiotics Biodegradation and Metabolism - Metabolism of Terpenoids and Polyketides - Amino Acid Metabolism - Lipid Metabolism - Energy Metabolism             | 4  | 3 |
| K00680                                                      | E2.3.1.-         |                                                                                                                                                     | Xenobiotics Biodegradation and Metabolism - Metabolism of Terpenoids and Polyketides - Amino Acid Metabolism                                                                                                    | 9  | 1 |
| K01666                                                      | E4.1.3.39, mhpE  | 4-hydroxy 2-oxovalerate aldolase [EC:4.1.3.39]                                                                                                      | Xenobiotics Biodegradation and Metabolism - Amino Acid Metabolism                                                                                                                                               | 35 | 3 |
| K01692                                                      | E4.2.1.17, paag  | enoyl-CoA hydratase [EC:4.2.1.17]                                                                                                                   | Carbohydrate Metabolism - Metabolism of Other Amino Acids - Xenobiotics Biodegradation and Metabolism - Metabolism of Terpenoids and Polyketides - Amino Acid Metabolism - Lipid Metabolism                     | 33 | 3 |
| K01726                                                      | E4.2.1.-         |                                                                                                                                                     | Carbohydrate Metabolism - Xenobiotics Biodegradation and Metabolism - Metabolism of Terpenoids and Polyketides                                                                                                  | 1  | 1 |
| K02554                                                      | mhpD             | 2-keto-4-pentenolate hydratase [EC:4.2.1.80]                                                                                                        | Xenobiotics Biodegradation and Metabolism - Amino Acid Metabolism                                                                                                                                               | 1  | 1 |
| K04073                                                      | mhpF             | acetaldehyde dehydrogenase [EC:1.2.1.10]                                                                                                            | Carbohydrate Metabolism - Xenobiotics Biodegradation and Metabolism                                                                                                                                             | 43 | 2 |
| K05783                                                      | berD             | 1,6-dihydroxycyclohexa-2,4-diene-1-carboxylate dehydrogenase [EC:1.3.1.25]                                                                          | Xenobiotics Biodegradation and Metabolism                                                                                                                                                                       | 1  | 1 |
| ko00363_Bisphenol degradation                               |                  |                                                                                                                                                     |                                                                                                                                                                                                                 |    |   |
| K00100                                                      | E1.1.1.-         |                                                                                                                                                     | Carbohydrate Metabolism - Xenobiotics Biodegradation and Metabolism - Lipid Metabolism                                                                                                                          | 1  | 1 |
| K01726                                                      | E4.2.1.-         |                                                                                                                                                     | Carbohydrate Metabolism - Xenobiotics Biodegradation and Metabolism - Metabolism of Terpenoids and Polyketides                                                                                                  | 1  | 1 |
| ko00364_Fluorobenzoate degradation                          |                  |                                                                                                                                                     |                                                                                                                                                                                                                 |    |   |
| K05783                                                      | berD             | 1,6-dihydroxycyclohexa-2,4-diene-1-carboxylate dehydrogenase [EC:1.3.1.25]                                                                          | Xenobiotics Biodegradation and Metabolism                                                                                                                                                                       | 1  | 1 |
| ko00380_Tryptophan metabolism                               |                  |                                                                                                                                                     |                                                                                                                                                                                                                 |    |   |
| K00128                                                      | E1.2.1.3         | aldehyde dehydrogenase (NAD+) [EC:1.2.1.3]                                                                                                          | Carbohydrate Metabolism - Metabolism of Other Amino Acids - Xenobiotics Biodegradation and Metabolism - Metabolism of Terpenoids and Polyketides - Amino Acid Metabolism - Lipid Metabolism                     | 4  | 4 |
| K00164                                                      | OGDH, sucA       | 2-oxoglutarate dehydrogenase E1 component [EC:1.2.4.2]                                                                                              | Carbohydrate Metabolism - Amino Acid Metabolism                                                                                                                                                                 | 2  | 1 |
| K00626                                                      | E2.3.1.9, atoB   | acetyl-CoA C-acetyltransferase [EC:2.3.1.9]                                                                                                         | Carbohydrate Metabolism - Signal Transduction - Xenobiotics Biodegradation and Metabolism - Metabolism of Terpenoids and Polyketides - Amino Acid Metabolism - Lipid Metabolism - Energy Metabolism             | 4  | 3 |
| K01426                                                      | E3.5.1.4, amIE   | amidase [EC:3.5.1.4]                                                                                                                                | Metabolism of Other Amino Acids - Xenobiotics Biodegradation and Metabolism - Amino Acid Metabolism                                                                                                             | 3  | 1 |
| K01501                                                      | E3.5.5.1         | nitrilase [EC:3.5.5.1]                                                                                                                              | Metabolism of Other Amino Acids - Xenobiotics Biodegradation and Metabolism - Amino Acid Metabolism - Energy Metabolism                                                                                         | 1  | 1 |
| K01556                                                      | E3.7.1.3         | kynureninase [EC:3.7.1.3]                                                                                                                           | Amino Acid Metabolism                                                                                                                                                                                           | 1  | 1 |
| K01667                                                      | E4.1.99.1, tnaA  | tryptophanase [EC:4.1.99.1]                                                                                                                         | Amino Acid Metabolism - Energy Metabolism                                                                                                                                                                       | 1  | 1 |
| K01692                                                      | E4.2.1.17, paag  | enoyl-CoA hydratase [EC:4.2.1.17]                                                                                                                   | Carbohydrate Metabolism - Metabolism of Other Amino Acids - Xenobiotics Biodegradation and Metabolism - Metabolism of Terpenoids and Polyketides - Amino Acid Metabolism - Lipid Metabolism                     | 33 | 3 |
| K01825                                                      | fadB             | 3-hydroxyacyl-CoA dehydrogenase / enoyl-CoA hydratase / 3-hydroxybutyryl-CoA epimerase / enoyl-CoA isomerase [EC:1.1.1.35 4.2.1.17 5.1.2.3 5.3.3.8] | Carbohydrate Metabolism - Metabolism of Other Amino Acids - Xenobiotics Biodegradation and Metabolism - Metabolism of Terpenoids and Polyketides - Amino Acid Metabolism - Lipid Metabolism - Energy Metabolism | 1  | 1 |
| K01867                                                      | WARS, trpS       | tryptophanyl-tRNA synthetase [EC:6.1.1.2]                                                                                                           | Translation - Amino Acid Metabolism                                                                                                                                                                             | 3  | 1 |
| K03781                                                      | katE, CAT        | catalase [EC:1.11.1.6]                                                                                                                              | Neurodegenerative Diseases - Transport and Catabolism - Amino Acid Metabolism - Energy Metabolism                                                                                                               | 1  | 1 |
| K03782                                                      | katG             | catalase/peroxidase [EC:1.11.1.6 1.11.1.7]                                                                                                          | Biosynthesis of Other Secondary Metabolites - Amino Acid Metabolism - Energy Metabolism                                                                                                                         | 9  | 1 |
| K04103                                                      | E4.1.1.74, ipcC  | indolepyruvate decarboxylase [EC:4.1.1.74]                                                                                                          | Amino Acid Metabolism                                                                                                                                                                                           | 1  | 1 |
| ko00400_Phenylalanine, tyrosine and tryptophan biosynthesis |                  |                                                                                                                                                     |                                                                                                                                                                                                                 |    |   |
| K00014                                                      | aroE             | shikimate dehydrogenase [EC:1.1.1.25]                                                                                                               | Amino Acid Metabolism                                                                                                                                                                                           | 3  | 1 |
| K00210                                                      | E1.3.1.12        | prephenate dehydrogenase [EC:1.3.1.12]                                                                                                              | Biosynthesis of Other Secondary Metabolites - Amino Acid Metabolism                                                                                                                                             | 1  | 1 |
| K00812                                                      | E2.6.1.1A, aspB  | aspartate aminotransferase [EC:2.6.1.1]                                                                                                             | Biosynthesis of Other Secondary Metabolites - Amino Acid Metabolism - Energy Metabolism                                                                                                                         | 46 | 3 |
| K00817                                                      | hisC             | histidinol-phosphate aminotransferase [EC:2.6.1.9]                                                                                                  | Biosynthesis of Other Secondary Metabolites - Amino Acid Metabolism                                                                                                                                             | 6  | 3 |
| K01657                                                      | trpE             | anthranilate synthase component I [EC:4.1.3.27]                                                                                                     | Amino Acid Metabolism                                                                                                                                                                                           | 2  | 2 |
| K01696                                                      | E4.2.1.20B, trpB | tryptophan synthase beta chain [EC:4.2.1.20]                                                                                                        | Amino Acid Metabolism                                                                                                                                                                                           | 1  | 1 |
| K01735                                                      | aroB             | 3-dehydroquinate synthase [EC:4.2.3.4]                                                                                                              | Amino Acid Metabolism                                                                                                                                                                                           | 28 | 4 |
| K03856                                                      | ARO2, aroA       | 3-deoxy-7-phosphoheptulonate synthase [EC:2.5.1.54]                                                                                                 | Amino Acid Metabolism                                                                                                                                                                                           | 3  | 3 |
| K04516                                                      | ARO1, aroA       | chorismate mutase [EC:5.4.99.5]                                                                                                                     | Amino Acid Metabolism                                                                                                                                                                                           | 1  | 1 |
| K04518                                                      | pheA2            | prephenate dehydratase [EC:4.2.1.51]                                                                                                                | Amino Acid Metabolism                                                                                                                                                                                           | 1  | 1 |
| K13853                                                      | aroG, aroA       | 3-deoxy-7-phosphoheptulonate synthase / chorismate mutase [EC:2.5.1.54 5.4.99.5]                                                                    | Amino Acid Metabolism                                                                                                                                                                                           | 1  | 1 |
| K14170                                                      | pheA             | chorismate mutase / prephenate dehydratase [EC:5.4.99.5 4.2.1.51]                                                                                   | Amino Acid Metabolism                                                                                                                                                                                           | 1  | 1 |
| ko00401_Novobiocin biosynthesis                             |                  |                                                                                                                                                     |                                                                                                                                                                                                                 |    |   |
| K00210                                                      | E1.3.1.12        | prephenate dehydrogenase [EC:1.3.1.12]                                                                                                              | Biosynthesis of Other Secondary Metabolites - Amino Acid Metabolism                                                                                                                                             | 1  | 1 |
| K00812                                                      | E2.6.1.1A, aspB  | aspartate aminotransferase [EC:2.6.1.1]                                                                                                             | Biosynthesis of Other Secondary Metabolites - Amino Acid Metabolism - Energy Metabolism                                                                                                                         | 46 | 3 |
| K00817                                                      | hisC             | histidinol-phosphate aminotransferase [EC:2.6.1.9]                                                                                                  | Biosynthesis of Other Secondary Metabolites - Amino Acid Metabolism                                                                                                                                             | 6  | 3 |
| ko00410_beta-Alanine metabolism                             |                  |                                                                                                                                                     |                                                                                                                                                                                                                 |    |   |
| K00128                                                      | E1.2.1.3         | aldehyde dehydrogenase (NAD+) [EC:1.2.1.3]                                                                                                          | Carbohydrate Metabolism - Metabolism of Other Amino Acids - Xenobiotics Biodegradation and Metabolism - Metabolism of Terpenoids and Polyketides - Amino Acid Metabolism - Lipid Metabolism                     | 4  | 4 |

|                                                     |                             |                                                                                                                                                     |                                                                                                                                                                                                                 |    |   |
|-----------------------------------------------------|-----------------------------|-----------------------------------------------------------------------------------------------------------------------------------------------------|-----------------------------------------------------------------------------------------------------------------------------------------------------------------------------------------------------------------|----|---|
| K00249                                              | E1.3.99.3, ACADM, acd       | acyl-CoA dehydrogenase [EC:1.3.99.3]                                                                                                                | Carbohydrate Metabolism - Metabolism of Other Amino Acids - Endocrine System - Amino Acid Metabolism - Lipid Metabolism                                                                                         | 1  | 1 |
| K00797                                              | E2.5.1.16, SRM, speE        | spermidine synthase [EC:2.5.1.16]                                                                                                                   | Metabolism of Other Amino Acids - Amino Acid Metabolism                                                                                                                                                         | 1  | 1 |
| K00823                                              | puuE                        | 4-aminobutyrate aminotransferase [EC:2.6.1.19]                                                                                                      | Carbohydrate Metabolism - Metabolism of Other Amino Acids - Amino Acid Metabolism                                                                                                                               | 1  | 1 |
| K01692                                              | E4.2.1.17, paaG             | enoyl-CoA hydratase [EC:4.2.1.17]                                                                                                                   | Carbohydrate Metabolism - Metabolism of Other Amino Acids - Xenobiotics Biodegradation and Metabolism - Metabolism of Terpenoids and Polyketides - Amino Acid Metabolism - Lipid Metabolism                     | 33 | 3 |
| K01825                                              | fadB                        | 3-hydroxyacyl-CoA dehydrogenase / enoyl-CoA hydratase / 3-hydroxybutyryl-CoA epimerase / enoyl-CoA isomerase [EC:1.1.1.35 4.2.1.17 5.1.2.3 5.3.3.8] | Carbohydrate Metabolism - Metabolism of Other Amino Acids - Xenobiotics Biodegradation and Metabolism - Metabolism of Terpenoids and Polyketides - Amino Acid Metabolism - Lipid Metabolism - Energy Metabolism | 1  | 1 |
| K07250                                              | gabT                        | 4-aminobutyrate aminotransferase / (S)-3-amino-2-methylpropionate transaminase [EC:2.6.1.19 2.6.1.22]                                               | Carbohydrate Metabolism - Metabolism of Other Amino Acids - Amino Acid Metabolism                                                                                                                               | 1  | 1 |
| ko00440_Phosphate and phosphinate metabolism        |                             |                                                                                                                                                     |                                                                                                                                                                                                                 |    |   |
| K00968                                              | E2.7.7.15, PCYT1            | choline-phosphate cytidylyltransferase [EC:2.7.7.15]                                                                                                | Metabolism of Other Amino Acids - Lipid Metabolism                                                                                                                                                              | 12 | 3 |
| K01841                                              | E5.4.2.9                    | phosphoenolpyruvate phosphomutase [EC:5.4.2.9]                                                                                                      | Metabolism of Other Amino Acids                                                                                                                                                                                 | 2  | 1 |
| ko00450_Selenocompound metabolism                   |                             |                                                                                                                                                     |                                                                                                                                                                                                                 |    |   |
| K00384                                              | E1.8.1.9, trxB              | thioredoxin reductase (NADPH) [EC:1.8.1.9]                                                                                                          | Metabolism of Other Amino Acids - Nucleotide Metabolism                                                                                                                                                         | 4  | 2 |
| K00548                                              | E2.1.1.13, methH            | 5-methyltetrahydrofolate-homocysteine methyltransferase [EC:2.1.1.13]                                                                               | Metabolism of Other Amino Acids - Metabolism of Cofactors and Vitamins - Amino Acid Metabolism                                                                                                                  | 23 | 5 |
| K00955                                              | cysNC                       | bifunctional enzyme CysN/CysC [EC:2.7.7.4 2.7.1.25]                                                                                                 | Metabolism of Other Amino Acids - Nucleotide Metabolism - Energy Metabolism                                                                                                                                     | 2  | 2 |
| K00957                                              | cysD                        | sulfate adenylyltransferase subunit 2 [EC:2.7.7.4]                                                                                                  | Metabolism of Other Amino Acids - Nucleotide Metabolism - Energy Metabolism                                                                                                                                     | 2  | 2 |
| K01760                                              | metC                        | cystathionine beta-lyase [EC:4.4.1.8]                                                                                                               | Metabolism of Other Amino Acids - Amino Acid Metabolism - Energy Metabolism                                                                                                                                     | 2  | 1 |
| K01874                                              | MARS, metG                  | methionyl-tRNA synthetase [EC:6.1.1.10]                                                                                                             | Translation - Metabolism of Other Amino Acids - Amino Acid Metabolism                                                                                                                                           | 6  | 3 |
| K11717                                              | sufS                        | cysteine desulfurase / selenocysteine lyase [EC:2.8.1.7 4.4.1.16]                                                                                   | Metabolism of Other Amino Acids - Metabolism of Cofactors and Vitamins                                                                                                                                          | 1  | 1 |
| ko00460_Cyanoamino acid metabolism                  |                             |                                                                                                                                                     |                                                                                                                                                                                                                 |    |   |
| K00600                                              | E2.1.2.1, glyA              | glycine hydroxymethyltransferase [EC:2.1.2.1]                                                                                                       | Metabolism of Other Amino Acids - Metabolism of Cofactors and Vitamins - Amino Acid Metabolism - Energy Metabolism                                                                                              | 25 | 4 |
| K01424                                              | E3.5.1.1, ansA, ansB        | L-asparaginase [EC:3.5.1.1]                                                                                                                         | Metabolism of Other Amino Acids - Amino Acid Metabolism - Energy Metabolism                                                                                                                                     | 1  | 1 |
| K01426                                              | E3.5.1.4, amE               | amidase [EC:3.5.1.4]                                                                                                                                | Metabolism of Other Amino Acids - Xenobiotics Biodegradation and Metabolism - Amino Acid Metabolism                                                                                                             | 3  | 1 |
| K01501                                              | E3.5.5.1                    | nitrilase [EC:3.5.5.1]                                                                                                                              | Metabolism of Other Amino Acids - Xenobiotics Biodegradation and Metabolism - Amino Acid Metabolism - Energy Metabolism                                                                                         | 1  | 1 |
| K05349                                              | bgjX                        | beta-glucosidase [EC:3.2.1.21]                                                                                                                      | Carbohydrate Metabolism - Metabolism of Other Amino Acids - Biosynthesis of Other Secondary Metabolites                                                                                                         | 1  | 1 |
| K05350                                              | bgjB                        | beta-glucosidase [EC:3.2.1.21]                                                                                                                      | Carbohydrate Metabolism - Metabolism of Other Amino Acids - Biosynthesis of Other Secondary Metabolites                                                                                                         | 4  | 2 |
| ko00471_D-Glutamine and D-glutamate metabolism      |                             |                                                                                                                                                     |                                                                                                                                                                                                                 |    |   |
| K00261                                              | E1.4.1.3                    | glutamate dehydrogenase (NAD(P) <sup>+</sup> ) [EC:1.4.1.3]                                                                                         | Metabolism of Other Amino Acids - Excretory System - Amino Acid Metabolism - Energy Metabolism                                                                                                                  | 3  | 2 |
| K01925                                              | murD                        | UDP-N-acetylmuramoylalanine-D-glutamate ligase [EC:6.3.2.9]                                                                                         | Metabolism of Other Amino Acids - Glycan Biosynthesis and Metabolism                                                                                                                                            | 2  | 2 |
| ko00472_D-Arginine and D-ornithine metabolism       |                             |                                                                                                                                                     |                                                                                                                                                                                                                 |    |   |
| K00273                                              | E1.4.3.3, DAO               | D-amino-acid oxidase [EC:1.4.3.3]                                                                                                                   | Metabolism of Other Amino Acids - Biosynthesis of Other Secondary Metabolites - Transport and Catabolism - Amino Acid Metabolism                                                                                | 2  | 1 |
| ko00473_D-Alanine metabolism                        |                             |                                                                                                                                                     |                                                                                                                                                                                                                 |    |   |
| K01921                                              | ddl                         | D-alanine-D-alanine ligase [EC:6.3.2.4]                                                                                                             | Metabolism of Other Amino Acids - Glycan Biosynthesis and Metabolism                                                                                                                                            | 2  | 2 |
| ko00480_Glutathione metabolism                      |                             |                                                                                                                                                     |                                                                                                                                                                                                                 |    |   |
| K00033                                              | E1.1.1.44, PGD, gnd         | 6-phosphogluconate dehydrogenase [EC:1.1.1.44]                                                                                                      | Carbohydrate Metabolism - Metabolism of Other Amino Acids                                                                                                                                                       | 20 | 3 |
| K00036                                              | G6PD, zwf                   | glucose-6-phosphate 1-dehydrogenase [EC:1.1.1.49]                                                                                                   | Carbohydrate Metabolism - Metabolism of Other Amino Acids                                                                                                                                                       | 22 | 2 |
| K00432                                              | E1.11.1.9                   | glutathione peroxidase [EC:1.11.1.9]                                                                                                                | Metabolism of Other Amino Acids - Lipid Metabolism                                                                                                                                                              | 2  | 2 |
| K00797                                              | E2.5.1.16, SRM, speE        | spermidine synthase [EC:2.5.1.16]                                                                                                                   | Metabolism of Other Amino Acids - Amino Acid Metabolism                                                                                                                                                         | 1  | 1 |
| K01255                                              | CARP, pepA                  | leucyl aminopeptidase [EC:3.4.11.1]                                                                                                                 | Metabolism of Other Amino Acids - Enzyme Families                                                                                                                                                               | 3  | 1 |
| K01581                                              | E4.1.1.17, ODC1, speC, speF | ornithine decarboxylase [EC:4.1.1.17]                                                                                                               | Metabolism of Other Amino Acids - Amino Acid Metabolism                                                                                                                                                         | 1  | 1 |
| K10807                                              | RRM1                        | ribonucleoside-diphosphate reductase subunit M1 [EC:1.17.4.1]                                                                                       | Metabolism of Other Amino Acids - Nucleotide Metabolism - Replication and Repair                                                                                                                                | 83 | 4 |
| K10808                                              | RRM2                        | ribonucleoside-diphosphate reductase subunit M2 [EC:1.17.4.1]                                                                                       | Metabolism of Other Amino Acids - Nucleotide Metabolism - Cell Growth and Death - Replication and Repair                                                                                                        | 67 | 5 |
| ko00500_Starch and sucrose metabolism               |                             |                                                                                                                                                     |                                                                                                                                                                                                                 |    |   |
| K00012                                              | UGDH, ugd                   | UDPGlucose 6-dehydrogenase [EC:1.1.1.22]                                                                                                            | Carbohydrate Metabolism                                                                                                                                                                                         | 91 | 5 |
| K00688                                              | E2.4.1.1, ggpP, PYG         | starch phosphorylase [EC:2.4.1.1]                                                                                                                   | Carbohydrate Metabolism - Endocrine System                                                                                                                                                                      | 9  | 3 |
| K00697                                              | E2.4.1.15, otsA             | alpha,alpha-trehalose-phosphate synthase (UDP-forming) [EC:2.4.1.15]                                                                                | Carbohydrate Metabolism - Glycan Biosynthesis and Metabolism                                                                                                                                                    | 3  | 1 |
| K00705                                              | malQ                        | 4-alpha-glucanotransferase [EC:2.4.1.25]                                                                                                            | Carbohydrate Metabolism                                                                                                                                                                                         | 1  | 1 |
| K00845                                              | glk                         | glucokinase [EC:2.7.1.2]                                                                                                                            | Carbohydrate Metabolism - Biosynthesis of Other Secondary Metabolites                                                                                                                                           | 2  | 2 |
| K00847                                              | E2.7.1.4, scrK              | fructokinase [EC:2.7.1.4]                                                                                                                           | Carbohydrate Metabolism                                                                                                                                                                                         | 1  | 1 |
| K00978                                              | rfbF                        | glucose-1-phosphate cytidylyltransferase [EC:2.7.7.33]                                                                                              | Carbohydrate Metabolism                                                                                                                                                                                         | 6  | 1 |
| K01176                                              | E3.2.1.1, amyA, malS        | alpha-amylase [EC:3.2.1.1]                                                                                                                          | Carbohydrate Metabolism - Digestive System                                                                                                                                                                      | 2  | 1 |
| K01179                                              | E3.2.1.4                    | endoglucanase [EC:3.2.1.4]                                                                                                                          | Carbohydrate Metabolism                                                                                                                                                                                         | 11 | 2 |
| K01187                                              | E3.2.1.20, malZ             | alpha-glucosidase [EC:3.2.1.20]                                                                                                                     | Carbohydrate Metabolism                                                                                                                                                                                         | 1  | 1 |
| K01193                                              | E3.2.1.26, sacA             | beta-fructofuranosidase [EC:3.2.1.26]                                                                                                               | Carbohydrate Metabolism                                                                                                                                                                                         | 1  | 1 |
| K01225                                              | E3.2.1.91                   | cellulose 1,4-beta-cellobiosidase [EC:3.2.1.91]                                                                                                     | Carbohydrate Metabolism                                                                                                                                                                                         | 7  | 2 |
| K01810                                              | GPI, pgi                    | glucose-6-phosphate isomerase [EC:5.3.1.9]                                                                                                          | Carbohydrate Metabolism                                                                                                                                                                                         | 2  | 2 |
| K02791                                              | PTS-Mal-EIIC, malX          | PTS system, maltose and glucose-specific IIC component                                                                                              | Carbohydrate Metabolism - Membrane Transport                                                                                                                                                                    | 1  | 1 |
| K05349                                              | bgjX                        | beta-glucosidase [EC:3.2.1.21]                                                                                                                      | Carbohydrate Metabolism - Metabolism of Other Amino Acids - Biosynthesis of Other Secondary Metabolites                                                                                                         | 1  | 1 |
| K05350                                              | bgjB                        | beta-glucosidase [EC:3.2.1.21]                                                                                                                      | Carbohydrate Metabolism - Metabolism of Other Amino Acids - Biosynthesis of Other Secondary Metabolites                                                                                                         | 4  | 2 |
| ko00510_N-Glycan biosynthesis                       |                             |                                                                                                                                                     |                                                                                                                                                                                                                 |    |   |
| K00721                                              | DPM1                        | dolichol-phosphate mannosyltransferase [EC:2.4.1.83]                                                                                                | Glycan Biosynthesis and Metabolism                                                                                                                                                                              | 39 | 3 |
| K00737                                              | MGAT3                       | beta-1,4-mannosyl-glycoprotein beta-1,4-N-acetylglucosaminyltransferase [EC:2.4.1.144]                                                              | Glycan Biosynthesis and Metabolism                                                                                                                                                                              | 23 | 3 |
| ko00511_Other glycan degradation                    |                             |                                                                                                                                                     |                                                                                                                                                                                                                 |    |   |
| K01190                                              | lacZ                        | beta-galactosidase [EC:3.2.1.23]                                                                                                                    | Carbohydrate Metabolism - Glycan Biosynthesis and Metabolism - Lipid Metabolism                                                                                                                                 | 1  | 1 |
| K01191                                              | E3.2.1.24                   | alpha-mannosidase [EC:3.2.1.24]                                                                                                                     | Glycan Biosynthesis and Metabolism                                                                                                                                                                              | 2  | 1 |
| K01206                                              | E3.2.1.51, FUCA             | alpha-L-fucosidase [EC:3.2.1.51]                                                                                                                    | Glycan Biosynthesis and Metabolism                                                                                                                                                                              | 1  | 1 |
| K01227                                              | E3.2.1.96                   | mannosyl-glycoprotein endo-beta-N-acetylglucosaminidase [EC:3.2.1.96]                                                                               | Glycan Biosynthesis and Metabolism                                                                                                                                                                              | 8  | 2 |
| K12373                                              | HEXA_B                      | hexosaminidase [EC:3.2.1.52]                                                                                                                        | Carbohydrate Metabolism - Folding, Sorting and Degradation - Glycan Biosynthesis and Metabolism - Transport and Catabolism                                                                                      | 1  | 1 |
| ko00520_Amino sugar and nucleotide sugar metabolism |                             |                                                                                                                                                     |                                                                                                                                                                                                                 |    |   |
| K00012                                              | UGDH, ugd                   | UDPGlucose 6-dehydrogenase [EC:1.1.1.22]                                                                                                            | Carbohydrate Metabolism                                                                                                                                                                                         | 91 | 5 |
| K00066                                              | algD                        | GDP-mannose 6-dehydrogenase [EC:1.1.1.132]                                                                                                          | Carbohydrate Metabolism - Signal Transduction                                                                                                                                                                   | 3  | 1 |
| K00523                                              | ascD, dhdD, rfbI            | CDP-4-dehydro-6-deoxyglucose reductase [EC:1.1.1.171]                                                                                               | Carbohydrate Metabolism                                                                                                                                                                                         | 7  | 2 |
| K00790                                              | murA                        | UDP-N-acetylglucosamine 1-carboxyvinyltransferase [EC:2.5.1.7]                                                                                      | Carbohydrate Metabolism - Glycan Biosynthesis and Metabolism                                                                                                                                                    | 12 | 2 |
| K00820                                              | E2.6.1.16, glmS             | glucosamine-fructose-6-phosphate aminotransferase (isomerizing) [EC:2.6.1.16]                                                                       | Carbohydrate Metabolism - Enzyme Families - Amino Acid Metabolism                                                                                                                                               | 20 | 4 |
| K00845                                              | glk                         | glucokinase [EC:2.7.1.2]                                                                                                                            | Carbohydrate Metabolism - Biosynthesis of Other Secondary Metabolites                                                                                                                                           | 2  | 2 |
| K00847                                              | E2.7.1.4, scrK              | fructokinase [EC:2.7.1.4]                                                                                                                           | Carbohydrate Metabolism                                                                                                                                                                                         | 1  | 1 |
| K00966                                              | GMPP                        | mannose-1-phosphate guanylyltransferase [EC:2.7.7.13]                                                                                               | Carbohydrate Metabolism                                                                                                                                                                                         | 4  | 2 |
| K00971                                              | E2.7.7.22, manC             | mannose-1-phosphate guanylyltransferase [EC:2.7.7.22]                                                                                               | Carbohydrate Metabolism                                                                                                                                                                                         | 12 | 4 |
| K00978                                              | rfbF                        | glucose-1-phosphate cytidylyltransferase [EC:2.7.7.33]                                                                                              | Carbohydrate Metabolism                                                                                                                                                                                         | 6  | 1 |

|                                             |                       |                                                                                                                           |                                                                                                                                                                                             |     |   |
|---------------------------------------------|-----------------------|---------------------------------------------------------------------------------------------------------------------------|---------------------------------------------------------------------------------------------------------------------------------------------------------------------------------------------|-----|---|
| K00983                                      | E2.7.7.43, neuA, CMAS | N-acetylneuraminase cytidyltransferase [EC:2.7.7.43]                                                                      | Carbohydrate Metabolism                                                                                                                                                                     | 11  | 5 |
| K01183                                      | E3.2.1.14             | chitinase [EC:3.2.1.14]                                                                                                   | Carbohydrate Metabolism                                                                                                                                                                     | 1   | 1 |
| K01207                                      | E3.2.1.52, nagZ       | beta-N-acetylhexosaminidase [EC:3.2.1.52]                                                                                 | Carbohydrate Metabolism                                                                                                                                                                     | 1   | 1 |
| K01209                                      | E3.2.1.55, abfA       | alpha-N-arabinofuranosidase [EC:3.2.1.55]                                                                                 | Carbohydrate Metabolism                                                                                                                                                                     | 1   | 1 |
| K01654                                      | E2.5.1.56, neuB       | N-acetylneuraminase synthase [EC:2.5.1.56]                                                                                | Carbohydrate Metabolism                                                                                                                                                                     | 126 | 8 |
| K01709                                      | rfbG                  | CDP-glucose 4,6-dehydratase [EC:4.2.1.45]                                                                                 | Carbohydrate Metabolism                                                                                                                                                                     | 6   | 3 |
| K01711                                      | E4.2.1.47, gmd        | GDPmannose 4,6-dehydratase [EC:4.2.1.47]                                                                                  | Carbohydrate Metabolism                                                                                                                                                                     | 533 | 7 |
| K01784                                      | gaE, GALE             | UDP-glucose 4-epimerase [EC:5.1.3.2]                                                                                      | Carbohydrate Metabolism                                                                                                                                                                     | 175 | 8 |
| K01791                                      | wecB                  | UDP-N-acetylglucosamine 2-epimerase [EC:5.1.3.14]                                                                         | Carbohydrate Metabolism - Glycan Biosynthesis and Metabolism                                                                                                                                | 38  | 7 |
| K01809                                      | E5.3.1.8, manA        | mannose-6-phosphate isomerase [EC:5.3.1.8]                                                                                | Carbohydrate Metabolism                                                                                                                                                                     | 17  | 3 |
| K01810                                      | GPI, pgi              | glucose-6-phosphate isomerase [EC:5.3.1.9]                                                                                | Carbohydrate Metabolism                                                                                                                                                                     | 2   | 2 |
| K01840                                      | E5.4.2.8, manB        | phosphomannomutase [EC:5.4.2.8]                                                                                           | Carbohydrate Metabolism                                                                                                                                                                     | 1   | 1 |
| K02377                                      | E1.1.1.271, fcl       | GDP-L-fucose synthase [EC:1.1.1.271]                                                                                      | Carbohydrate Metabolism                                                                                                                                                                     | 251 | 7 |
| K02472                                      | wecC                  | UDP-N-acetyl-D-mannosaminuronic acid dehydrogenase [EC:1.1.1.1-]                                                          | Carbohydrate Metabolism                                                                                                                                                                     | 1   | 1 |
| K02473                                      | E5.1.3.7, wbpP        | UDP-N-acetylglucosamine 4-epimerase [EC:5.1.3.7]                                                                          | Carbohydrate Metabolism                                                                                                                                                                     | 2   | 2 |
| K02564                                      | nagB, GNPDA           | glucosamine-6-phosphate deaminase [EC:3.5.99.6]                                                                           | Carbohydrate Metabolism                                                                                                                                                                     | 2   | 2 |
| K02795                                      | PTS-Man-EIIC, many    | PTS system, mannose-specific IIC component                                                                                | Carbohydrate Metabolism - Membrane Transport                                                                                                                                                | 1   | 1 |
| K03431                                      | glmM                  | phosphoglucosamine mutase [EC:5.4.2.10]                                                                                   | Carbohydrate Metabolism                                                                                                                                                                     | 5   | 2 |
| K04042                                      | glmU                  | bifunctional UDP-N-acetylglucosamine pyrophosphorylase / Glucosamine-1-phosphate N-acetyltransferase [EC:2.7.23.23.1.157] | Carbohydrate Metabolism                                                                                                                                                                     | 2   | 2 |
| K05304                                      | NANS, SAS             | sialic acid synthase [EC:2.5.1.56.2.5.157]                                                                                | Carbohydrate Metabolism                                                                                                                                                                     | 1   | 1 |
| K06118                                      | E3.13.1.1, sqd1, sqdb | UDP-sulfoquinovose synthase [EC:3.13.1.1]                                                                                 | Carbohydrate Metabolism - Lipid Metabolism                                                                                                                                                  | 2   | 2 |
| K07106                                      | murQ                  | N-acetylmuramic acid 6-phosphate etherase [EC:4.2.-.-]                                                                    | Carbohydrate Metabolism                                                                                                                                                                     | 1   | 1 |
| K07806                                      | amB, pmrH             | UDP-4-amino-4-deoxy-L-arabinose-oxoglutarate aminotransferase [EC:2.6.1.87]                                               | Carbohydrate Metabolism - Signal Transduction - Glycan Biosynthesis and Metabolism - Amino Acid Metabolism                                                                                  | 3   | 2 |
| K11528                                      | glmU1                 | UDP-N-acetylglucosamine pyrophosphorylase [EC:2.7.23.2]                                                                   | Carbohydrate Metabolism                                                                                                                                                                     | 1   | 1 |
| K12373                                      | HEXA_B                | hexosaminidase [EC:3.2.1.52]                                                                                              | Carbohydrate Metabolism - Folding, Sorting and Degradation - Glycan Biosynthesis and Metabolism - Transport and Catabolism                                                                  | 1   | 1 |
| K12410                                      | npdA                  | NAD-dependent deacetylase [EC:3.5.1.-]                                                                                    | Carbohydrate Metabolism                                                                                                                                                                     | 4   | 1 |
| K12452                                      | rfbH                  | CDP-6-deoxy-D-xylo-4-hexulose-3-dehydrase                                                                                 | Carbohydrate Metabolism                                                                                                                                                                     | 329 | 6 |
| K12454                                      | rfbE                  | CDP-paratose 2-epimerase [EC:5.1.3.10]                                                                                    | Carbohydrate Metabolism                                                                                                                                                                     | 19  | 4 |
| ko00521_Streptomycin biosynthesis           |                       |                                                                                                                           |                                                                                                                                                                                             |     |   |
| K00067                                      | rfbD                  | dTDP-4-dehydrothamnosine reductase [EC:1.1.1.133]                                                                         | Biosynthesis of Other Secondary Metabolites - Metabolism of Terpenoids and Polyketides                                                                                                      | 39  | 4 |
| K00845                                      | glk                   | glucokinase [EC:2.7.1.2]                                                                                                  | Carbohydrate Metabolism - Biosynthesis of Other Secondary Metabolites                                                                                                                       | 2   | 2 |
| K00973                                      | E2.7.7.24, rfaB, rffH | glucose-1-phosphate thymidyltransferase [EC:2.7.7.24]                                                                     | Biosynthesis of Other Secondary Metabolites - Metabolism of Terpenoids and Polyketides                                                                                                      | 28  | 5 |
| K01092                                      | E3.1.3.25, IMPA, suhB | myo-inositol-1(or 4)-monophosphatase [EC:3.1.3.25]                                                                        | Carbohydrate Metabolism - Signal Transduction - Biosynthesis of Other Secondary Metabolites                                                                                                 | 3   | 2 |
| K01710                                      | E4.2.1.46, rfbB, rffG | dTDP-glucose 4,6-dehydratase [EC:4.2.1.46]                                                                                | Biosynthesis of Other Secondary Metabolites - Metabolism of Terpenoids and Polyketides                                                                                                      | 341 | 7 |
| K01790                                      | rfcC                  | dTDP-4-dehydrothamnosine 3,5-epimerase [EC:5.1.3.13]                                                                      | Biosynthesis of Other Secondary Metabolites - Metabolism of Terpenoids and Polyketides                                                                                                      | 89  | 4 |
| K01858                                      | E5.5.1.4, INO1        | myo-inositol-1-phosphate synthase [EC:5.5.1.4]                                                                            | Carbohydrate Metabolism - Biosynthesis of Other Secondary Metabolites                                                                                                                       | 1   | 1 |
| K04340                                      | strB1                 | scyllo-inosamine-4-phosphate amidinotransferase 1 [EC:2.1.4.2]                                                            | Biosynthesis of Other Secondary Metabolites                                                                                                                                                 | 16  | 2 |
| ko00523_Polyketide sugar unit biosynthesis  |                       |                                                                                                                           |                                                                                                                                                                                             |     |   |
| K00067                                      | rfbD                  | dTDP-4-dehydrothamnosine reductase [EC:1.1.1.133]                                                                         | Biosynthesis of Other Secondary Metabolites - Metabolism of Terpenoids and Polyketides                                                                                                      | 39  | 4 |
| K00973                                      | E2.7.7.24, rfaB, rffH | glucose-1-phosphate thymidyltransferase [EC:2.7.7.24]                                                                     | Biosynthesis of Other Secondary Metabolites - Metabolism of Terpenoids and Polyketides                                                                                                      | 28  | 5 |
| K01710                                      | E4.2.1.46, rfbB, rffG | dTDP-glucose 4,6-dehydratase [EC:4.2.1.46]                                                                                | Biosynthesis of Other Secondary Metabolites - Metabolism of Terpenoids and Polyketides                                                                                                      | 341 | 7 |
| K01790                                      | rfcC                  | dTDP-4-dehydrothamnosine 3,5-epimerase [EC:5.1.3.13]                                                                      | Biosynthesis of Other Secondary Metabolites - Metabolism of Terpenoids and Polyketides                                                                                                      | 89  | 4 |
| ko00524_Butirosin and neomycin biosynthesis |                       |                                                                                                                           |                                                                                                                                                                                             |     |   |
| K00845                                      | glk                   | glucokinase [EC:2.7.1.2]                                                                                                  | Carbohydrate Metabolism - Biosynthesis of Other Secondary Metabolites                                                                                                                       | 2   | 2 |
| ko00531_Glycosaminoglycan degradation       |                       |                                                                                                                           |                                                                                                                                                                                             |     |   |
| K12373                                      | HEXA_B                | hexosaminidase [EC:3.2.1.52]                                                                                              | Carbohydrate Metabolism - Folding, Sorting and Degradation - Glycan Biosynthesis and Metabolism - Transport and Catabolism                                                                  | 1   | 1 |
| ko00540_Lipopolyaccharide biosynthesis      |                       |                                                                                                                           |                                                                                                                                                                                             |     |   |
| K00677                                      | lpxA                  | UDP-N-acetylglucosamine acyltransferase [EC:2.3.1.129]                                                                    | Glycan Biosynthesis and Metabolism                                                                                                                                                          | 137 | 3 |
| K00979                                      | kdsB                  | 3-deoxy-manno-octulosonate cytidyltransferase (CMP-KDO synthetase) [EC:2.7.7.38]                                          | Glycan Biosynthesis and Metabolism                                                                                                                                                          | 4   | 2 |
| K01627                                      | kdsA                  | 2-dehydro-3-deoxyphosphoacetate aldolase (KDO 8-P synthase) [EC:2.5.1.55]                                                 | Glycan Biosynthesis and Metabolism                                                                                                                                                          | 24  | 5 |
| K02535                                      | lpxC                  | UDP-3-O-[3-hydroxymyristoyl] N-acetylglucosamine deacetylase [EC:3.5.1.-]                                                 | Glycan Biosynthesis and Metabolism                                                                                                                                                          | 5   | 2 |
| K02536                                      | lpxD                  | UDP-3-O-[3-hydroxymyristoyl] glucosamine N-acyltransferase [EC:2.3.1.-]                                                   | Glycan Biosynthesis and Metabolism                                                                                                                                                          | 12  | 2 |
| K02841                                      | waaC, rfaC            | heptosyltransferase I [EC:2.4.-.-]                                                                                        | Glycan Biosynthesis and Metabolism                                                                                                                                                          | 3   | 2 |
| K02843                                      | waaF, rfaF            | heptosyltransferase II [EC:2.4.-.-]                                                                                       | Glycan Biosynthesis and Metabolism                                                                                                                                                          | 18  | 2 |
| K02849                                      | waaQ, rfaQ            | heptosyltransferase III [EC:2.4.-.-]                                                                                      | Glycan Biosynthesis and Metabolism                                                                                                                                                          | 1   | 1 |
| K03270                                      | kdsC                  | 3-deoxy-D-manno-octulosonate 8-phosphate phosphatase (KDO 8-P phosphatase) [EC:3.1.3.45]                                  | Glycan Biosynthesis and Metabolism                                                                                                                                                          | 6   | 1 |
| K03271                                      | gmhA                  | phosphoheptose isomerase [EC:5.-.-.-]                                                                                     | Glycan Biosynthesis and Metabolism                                                                                                                                                          | 4   | 3 |
| K03272                                      | gmhC, hNc, waaE, rfaE | D-beta-D-heptose 7-phosphate kinase / D-beta-D-heptose 1-phosphate adenosyltransferase [EC:2.7.1.-.2.7.7.1]               | Glycan Biosynthesis and Metabolism                                                                                                                                                          | 71  | 4 |
| K03273                                      | gmhB                  | D-glycero-D-manno-heptose 1,7-bisphosphate phosphatase [EC:3.1.3.-]                                                       | Glycan Biosynthesis and Metabolism                                                                                                                                                          | 1   | 1 |
| K03274                                      | rfaD                  | ADP-L-glycero-D-manno-heptose 6-epimerase [EC:5.1.3.20]                                                                   | Glycan Biosynthesis and Metabolism                                                                                                                                                          | 46  | 3 |
| ko00550_Peptidoglycan biosynthesis          |                       |                                                                                                                           |                                                                                                                                                                                             |     |   |
| K00790                                      | murA                  | UDP-N-acetylglucosamine 1-carboxyvinyltransferase [EC:2.5.1.7]                                                            | Carbohydrate Metabolism - Glycan Biosynthesis and Metabolism                                                                                                                                | 12  | 2 |
| K01000                                      | murY                  | phospho-N-acetylmuramoyl-pentapeptide-transferase [EC:2.7.8.13]                                                           | Glycan Biosynthesis and Metabolism                                                                                                                                                          | 2   | 1 |
| K01921                                      | ddl                   | D-alanine-D-alanine ligase [EC:6.3.2.4]                                                                                   | Metabolism of Other Amino Acids - Glycan Biosynthesis and Metabolism                                                                                                                        | 2   | 2 |
| K01925                                      | murD                  | UDP-N-acetylmuramoylalanine-D-glutamate ligase [EC:6.3.2.9]                                                               | Metabolism of Other Amino Acids - Glycan Biosynthesis and Metabolism                                                                                                                        | 2   | 2 |
| K01929                                      | murF                  | UDP-N-acetylmuramoylalanyl-D-glutamyl-2,6-diaminopimelate-D-alanyl-D-alanine ligase [EC:6.3.2.10]                         | Glycan Biosynthesis and Metabolism - Amino Acid Metabolism                                                                                                                                  | 1   | 1 |
| K03587                                      | ftsI                  | cell division protein FtsI (penicillin-binding protein 3) [EC:2.4.1.129]                                                  | Glycan Biosynthesis and Metabolism - Replication and Repair                                                                                                                                 | 1   | 1 |
| K05366                                      | mraA                  | penicillin-binding protein 1A [EC:2.4.1.-.3.4.-.-]                                                                        | Glycan Biosynthesis and Metabolism                                                                                                                                                          | 1   | 1 |
| K05367                                      | pbpC                  | penicillin-binding protein 1C [EC:2.4.1.-]                                                                                | Glycan Biosynthesis and Metabolism                                                                                                                                                          | 2   | 1 |
| K06153                                      | E3.6.1.27, bacA       | undecaprenyl-diphosphatase [EC:3.6.1.27]                                                                                  | Glycan Biosynthesis and Metabolism                                                                                                                                                          | 1   | 1 |
| K07260                                      | vanY                  | D-alanyl-D-alanine carboxypeptidase [EC:3.4.16.4]                                                                         | Enzyme Families - Glycan Biosynthesis and Metabolism                                                                                                                                        | 6   | 2 |
| ko00561_Glycerolipid metabolism             |                       |                                                                                                                           |                                                                                                                                                                                             |     |   |
| K00005                                      | E1.1.1.6, gldA        | glycerol dehydrogenase [EC:1.1.1.6]                                                                                       | Lipid Metabolism                                                                                                                                                                            | 1   | 1 |
| K00128                                      | E1.2.1.3              | aldehyde dehydrogenase (NAD+) [EC:1.2.1.3]                                                                                | Carbohydrate Metabolism - Metabolism of Other Amino Acids - Xenobiotics Biodegradation and Metabolism - Metabolism of Terpenoids and Polyketides - Amino Acid Metabolism - Lipid Metabolism | 4   | 4 |
| K00655                                      | plsC                  | 1-acyl-sn-glycerol-3-phosphate acyltransferase [EC:2.3.1.51]                                                              | Lipid Metabolism                                                                                                                                                                            | 8   | 2 |
| K00864                                      | E2.7.1.30, glpK       | glycerol kinase [EC:2.7.1.30]                                                                                             | Environmental Adaptation - Endocrine System - Lipid Metabolism                                                                                                                              | 3   | 3 |
| K01046                                      | E3.1.1.3              | triacylglycerol lipase [EC:3.1.1.3]                                                                                       | Lipid Metabolism                                                                                                                                                                            | 7   | 3 |
| K03429                                      | ugtP                  | 1,2-diacylglycerol 3-glucosyltransferase [EC:2.4.1.157]                                                                   | Glycan Biosynthesis and Metabolism - Lipid Metabolism                                                                                                                                       | 8   | 1 |
| K06118                                      | E3.13.1.1, sqd1, sqdb | UDP-sulfoquinovose synthase [EC:3.13.1.1]                                                                                 | Carbohydrate Metabolism - Lipid Metabolism                                                                                                                                                  | 2   | 2 |
| ko00562_Inositol phosphate metabolism       |                       |                                                                                                                           |                                                                                                                                                                                             |     |   |
| K00140                                      | E1.2.1.27, mmsA, ioIA | methylmalonate-semialdehyde dehydrogenase [EC:1.2.1.27]                                                                   | Carbohydrate Metabolism - Amino Acid Metabolism                                                                                                                                             | 1   | 1 |
| K01092                                      | E3.1.3.25, IMPA, suhB | myo-inositol-1(or 4)-monophosphatase [EC:3.1.3.25]                                                                        | Carbohydrate Metabolism - Signal Transduction - Biosynthesis of Other Secondary Metabolites                                                                                                 | 3   | 2 |
| K01858                                      | E5.5.1.4, INO1        | myo-inositol-1-phosphate synthase [EC:5.5.1.4]                                                                            | Carbohydrate Metabolism - Biosynthesis of Other Secondary Metabolites                                                                                                                       | 1   | 1 |
| K03338                                      | ioIC                  | 5-dehydro-2-deoxygluconokinase [EC:2.7.1.92]                                                                              | Carbohydrate Metabolism                                                                                                                                                                     | 1   | 1 |
| ko00564_Glycerophospholipid metabolism      |                       |                                                                                                                           |                                                                                                                                                                                             |     |   |
| K00057                                      | gpsA                  | glycerol-3-phosphate dehydrogenase (NAD(P+)) [EC:1.1.1.94]                                                                | Lipid Metabolism                                                                                                                                                                            | 2   | 2 |

|                                                         |                       |                                                                                           |                                                                                                                                                                                                     |     |   |
|---------------------------------------------------------|-----------------------|-------------------------------------------------------------------------------------------|-----------------------------------------------------------------------------------------------------------------------------------------------------------------------------------------------------|-----|---|
| K00111                                                  | glaA, glpD            | glycerol-3-phosphate dehydrogenase [EC:1.1.5.3]                                           | Lipid Metabolism                                                                                                                                                                                    | 1   | 1 |
| K00655                                                  | plsC                  | 1-acyl-sn-glycerol-3-phosphate acyltransferase [EC:2.3.1.51]                              | Lipid Metabolism                                                                                                                                                                                    | 8   | 2 |
| K00968                                                  | E2.7.7.15, PCYT1      | choline-phosphate cytidyltransferase [EC:2.7.7.15]                                        | Metabolism of Other Amino Acids - Lipid Metabolism                                                                                                                                                  | 12  | 3 |
| K00980                                                  | tagD                  | glycerol-3-phosphate cytidyltransferase [EC:2.7.7.39]                                     | Lipid Metabolism                                                                                                                                                                                    | 86  | 6 |
| K00995                                                  | E2.7.8.5, pgsA        | CDP-diacylglycerol-glycerol-3-phosphate 3-phosphatidyltransferase [EC:2.7.8.5]            | Lipid Metabolism                                                                                                                                                                                    | 1   | 1 |
| K00998                                                  | E2.7.8.8, pssA        | phosphatidylserine synthase [EC:2.7.8.8]                                                  | Amino Acid Metabolism - Lipid Metabolism                                                                                                                                                            | 2   | 2 |
| K01096                                                  | pgpB                  | phosphatidylglycerophosphatase B [EC:3.1.3.27]                                            | Lipid Metabolism                                                                                                                                                                                    | 1   | 1 |
| K01613                                                  | E4.1.1.65, psd        | phosphatidylserine decarboxylase [EC:4.1.1.65]                                            | Lipid Metabolism                                                                                                                                                                                    | 27  | 4 |
| ko00590_Arachidonic acid metabolism                     |                       |                                                                                           |                                                                                                                                                                                                     |     |   |
| K00432                                                  | E1.11.1.9             | glutathione peroxidase [EC:1.11.1.9]                                                      | Metabolism of Other Amino Acids - Lipid Metabolism                                                                                                                                                  | 2   | 2 |
| ko00591_Linoleic acid metabolism                        |                       |                                                                                           |                                                                                                                                                                                                     |     |   |
| K00100                                                  | E1.1.1.-              |                                                                                           | Carbohydrate Metabolism - Xenobiotics Biodegradation and Metabolism - Lipid Metabolism                                                                                                              | 1   | 1 |
| ko00600_Sphingolipid metabolism                         |                       |                                                                                           |                                                                                                                                                                                                     |     |   |
| K01190                                                  | lacZ                  | beta-galactosidase [EC:3.2.1.23]                                                          | Carbohydrate Metabolism - Glycan Biosynthesis and Metabolism - Lipid Metabolism                                                                                                                     | 1   | 1 |
| ko00603_Glycosphingolipid biosynthesis - globo series   |                       |                                                                                           |                                                                                                                                                                                                     |     |   |
| K12373                                                  | HEXA_B                | hexosaminidase [EC:3.2.1.52]                                                              | Carbohydrate Metabolism - Folding, Sorting and Degradation - Glycan Biosynthesis and Metabolism - Transport and Catabolism                                                                          | 1   | 1 |
| ko00604_Glycosphingolipid biosynthesis - ganglio series |                       |                                                                                           |                                                                                                                                                                                                     |     |   |
| K12373                                                  | HEXA_B                | hexosaminidase [EC:3.2.1.52]                                                              | Carbohydrate Metabolism - Folding, Sorting and Degradation - Glycan Biosynthesis and Metabolism - Transport and Catabolism                                                                          | 1   | 1 |
| ko00620_Pyruvate metabolism                             |                       |                                                                                           |                                                                                                                                                                                                     |     |   |
| K00024                                                  | mdh                   | malate dehydrogenase [EC:1.1.1.37]                                                        | Carbohydrate Metabolism - Energy Metabolism                                                                                                                                                         | 3   | 3 |
| K00027                                                  | E1.1.1.38, sfcA, maeA | malate dehydrogenase (oxaloacetate-decarboxylating) [EC:1.1.1.38]                         | Carbohydrate Metabolism - Signal Transduction                                                                                                                                                       | 2   | 1 |
| K00029                                                  | E1.1.1.40, maeB       | malate dehydrogenase (oxaloacetate-decarboxylating)(NADP+) [EC:1.1.1.40]                  | Carbohydrate Metabolism - Energy Metabolism                                                                                                                                                         | 2   | 1 |
| K00101                                                  | E1.1.2.3, lldD        | L-lactate dehydrogenase (cytochrome) [EC:1.1.2.3]                                         | Carbohydrate Metabolism                                                                                                                                                                             | 1   | 1 |
| K00128                                                  | E1.2.1.3              | aldehyde dehydrogenase (NAD+) [EC:1.2.1.3]                                                | Carbohydrate Metabolism - Metabolism of Other Amino Acids - Xenobiotics Biodegradation and Metabolism - Metabolism of Terpenoids and Polyketides - Amino Acid Metabolism - Lipid Metabolism         | 4   | 4 |
| K00156                                                  | poxB                  | pyruvate dehydrogenase (quinone) [EC:1.2.5.1]                                             | Carbohydrate Metabolism                                                                                                                                                                             | 3   | 2 |
| K00161                                                  | PDHA, pdhA            | pyruvate dehydrogenase E1 component subunit alpha [EC:1.2.4.1]                            | Carbohydrate Metabolism - Amino Acid Metabolism                                                                                                                                                     | 57  | 3 |
| K00162                                                  | PDHB, pdhB            | pyruvate dehydrogenase E1 component subunit beta [EC:1.2.4.1]                             | Carbohydrate Metabolism - Amino Acid Metabolism                                                                                                                                                     | 37  | 3 |
| K00382                                                  | DLD, lpd, pdhD        | dihydrolipoamide dehydrogenase [EC:1.8.1.4]                                               | Carbohydrate Metabolism - Amino Acid Metabolism                                                                                                                                                     | 1   | 1 |
| K00626                                                  | E2.3.1.9, atoB        | acetyl-CoA C-acetyltransferase [EC:2.3.1.9]                                               | Carbohydrate Metabolism - Signal Transduction - Xenobiotics Biodegradation and Metabolism - Metabolism of Terpenoids and Polyketides - Amino Acid Metabolism - Lipid Metabolism - Energy Metabolism | 4   | 3 |
| K00627                                                  | DLAT, aceF, pdhC      | pyruvate dehydrogenase E2 component (dihydrolipoamide acetyltransferase) [EC:2.3.1.12]    | Carbohydrate Metabolism                                                                                                                                                                             | 1   | 1 |
| K01006                                                  | ppdK                  | pyruvate,orthophosphate dikinase [EC:2.7.9.1]                                             | Carbohydrate Metabolism - Energy Metabolism                                                                                                                                                         | 1   | 1 |
| K01007                                                  | pps, ppsA             | pyruvate, water dikinase [EC:2.7.9.2]                                                     | Carbohydrate Metabolism - Energy Metabolism                                                                                                                                                         | 107 | 4 |
| K01595                                                  | ppc                   | phosphoenolpyruvate carboxylase [EC:4.1.1.31]                                             | Carbohydrate Metabolism - Energy Metabolism                                                                                                                                                         | 1   | 1 |
| K01610                                                  | E4.1.1.49, pckA       | phosphoenolpyruvate carboxykinase (ATP) [EC:4.1.1.49]                                     | Carbohydrate Metabolism - Energy Metabolism                                                                                                                                                         | 4   | 2 |
| K01638                                                  | E2.3.3.9, aceB, glcB  | malate synthase [EC:2.3.3.9]                                                              | Carbohydrate Metabolism                                                                                                                                                                             | 9   | 3 |
| K01649                                                  | E2.3.3.13, leuA       | 2-isopropylmalate synthase [EC:2.3.3.13]                                                  | Carbohydrate Metabolism - Amino Acid Metabolism                                                                                                                                                     | 1   | 1 |
| K01734                                                  | E4.2.3.3, mgsA        | methylglyoxal synthase [EC:4.2.3.3]                                                       | Carbohydrate Metabolism                                                                                                                                                                             | 30  | 3 |
| K01759                                                  | E4.4.1.5, GLO1, gloA  | lactoylglutathione lyase [EC:4.4.1.5]                                                     | Carbohydrate Metabolism - Signal Transduction                                                                                                                                                       | 8   | 1 |
| K01895                                                  | ACSS, acs             | acetyl-CoA synthetase [EC:6.2.1.1]                                                        | Carbohydrate Metabolism - Lipid Metabolism - Energy Metabolism                                                                                                                                      | 1   | 1 |
| K01962                                                  | accA                  | acetyl-CoA carboxylase carboxyl transferase subunit alpha [EC:6.4.1.2]                    | Carbohydrate Metabolism - Metabolism of Terpenoids and Polyketides - Lipid Metabolism - Energy Metabolism                                                                                           | 1   | 1 |
| K01963                                                  | accD                  | acetyl-CoA carboxylase carboxyl transferase subunit beta [EC:6.4.1.2]                     | Carbohydrate Metabolism - Metabolism of Terpenoids and Polyketides - Lipid Metabolism - Energy Metabolism                                                                                           | 2   | 2 |
| K03778                                                  | ldhA                  | D-lactate dehydrogenase [EC:1.1.1.28]                                                     | Carbohydrate Metabolism                                                                                                                                                                             | 1   | 1 |
| K04073                                                  | mhpF                  | acetaldehyde dehydrogenase [EC:1.2.1.10]                                                  | Carbohydrate Metabolism - Xenobiotics Biodegradation and Metabolism                                                                                                                                 | 43  | 2 |
| ko00621_Dioxin degradation                              |                       |                                                                                           |                                                                                                                                                                                                     |     |   |
| K01666                                                  | E4.1.3.39, mhpE       | 4-hydroxy 2-oxovalerate aldolase [EC:4.1.3.39]                                            | Xenobiotics Biodegradation and Metabolism - Amino Acid Metabolism                                                                                                                                   | 35  | 3 |
| K02554                                                  | mhpD                  | 2-keto-4-pentenoate hydratase [EC:4.2.1.80]                                               | Xenobiotics Biodegradation and Metabolism - Amino Acid Metabolism                                                                                                                                   | 1   | 1 |
| K04073                                                  | mhpF                  | acetaldehyde dehydrogenase [EC:1.2.1.10]                                                  | Carbohydrate Metabolism - Xenobiotics Biodegradation and Metabolism                                                                                                                                 | 43  | 2 |
| ko00622_Xylene degradation                              |                       |                                                                                           |                                                                                                                                                                                                     |     |   |
| K01666                                                  | E4.1.3.39, mhpE       | 4-hydroxy 2-oxovalerate aldolase [EC:4.1.3.39]                                            | Xenobiotics Biodegradation and Metabolism - Amino Acid Metabolism                                                                                                                                   | 35  | 3 |
| K02554                                                  | mhpD                  | 2-keto-4-pentenoate hydratase [EC:4.2.1.80]                                               | Xenobiotics Biodegradation and Metabolism - Amino Acid Metabolism                                                                                                                                   | 1   | 1 |
| K04073                                                  | mhpF                  | acetaldehyde dehydrogenase [EC:1.2.1.10]                                                  | Carbohydrate Metabolism - Xenobiotics Biodegradation and Metabolism                                                                                                                                 | 43  | 2 |
| ko00623_Toluene degradation                             |                       |                                                                                           |                                                                                                                                                                                                     |     |   |
| K00239                                                  | sdhA                  | succinate dehydrogenase flavoprotein subunit [EC:1.3.99.1]                                | Carbohydrate Metabolism - Xenobiotics Biodegradation and Metabolism - Energy Metabolism                                                                                                             | 2   | 2 |
| K00240                                                  | sdhB                  | succinate dehydrogenase iron-sulfur protein [EC:1.3.99.1]                                 | Carbohydrate Metabolism - Xenobiotics Biodegradation and Metabolism - Energy Metabolism                                                                                                             | 18  | 1 |
| ko00624_Polycyclic aromatic hydrocarbon degradation     |                       |                                                                                           |                                                                                                                                                                                                     |     |   |
| K00599                                                  | E2.1.1.-              |                                                                                           | Xenobiotics Biodegradation and Metabolism - Amino Acid Metabolism                                                                                                                                   | 55  | 3 |
| ko00625_Chloroalkane and chloroalkene degradation       |                       |                                                                                           |                                                                                                                                                                                                     |     |   |
| K00001                                                  | E1.1.1.1, adh         | alcohol dehydrogenase [EC:1.1.1.1]                                                        | Carbohydrate Metabolism - Metabolism of Cofactors and Vitamins - Xenobiotics Biodegradation and Metabolism - Amino Acid Metabolism - Lipid Metabolism                                               | 1   | 1 |
| K00100                                                  | E1.1.1.-              |                                                                                           | Carbohydrate Metabolism - Xenobiotics Biodegradation and Metabolism - Lipid Metabolism                                                                                                              | 1   | 1 |
| K00121                                                  | frmA, ADH5, adhC      | S-(hydroxymethyl)glutathione dehydrogenase / alcohol dehydrogenase [EC:1.1.1.284 1.1.1.1] | Carbohydrate Metabolism - Metabolism of Cofactors and Vitamins - Xenobiotics Biodegradation and Metabolism - Amino Acid Metabolism - Lipid Metabolism - Energy Metabolism                           | 8   | 3 |
| K00128                                                  | E1.2.1.3              | aldehyde dehydrogenase (NAD+) [EC:1.2.1.3]                                                | Carbohydrate Metabolism - Metabolism of Other Amino Acids - Xenobiotics Biodegradation and Metabolism - Metabolism of Terpenoids and Polyketides - Amino Acid Metabolism - Lipid Metabolism         | 4   | 4 |
| K01563                                                  | dhaA                  | haloalkane dehalogenase [EC:3.8.1.5]                                                      | Xenobiotics Biodegradation and Metabolism                                                                                                                                                           | 1   | 1 |
| K13953                                                  | adhP                  | alcohol dehydrogenase, propanol-preferring [EC:1.1.1.1]                                   | Carbohydrate Metabolism - Metabolism of Cofactors and Vitamins - Xenobiotics Biodegradation and Metabolism - Amino Acid Metabolism - Lipid Metabolism                                               | 1   | 1 |
| ko00626_Naphthalene degradation                         |                       |                                                                                           |                                                                                                                                                                                                     |     |   |
| K00001                                                  | E1.1.1.1, adh         | alcohol dehydrogenase [EC:1.1.1.1]                                                        | Carbohydrate Metabolism - Metabolism of Cofactors and Vitamins - Xenobiotics Biodegradation and Metabolism - Amino Acid Metabolism - Lipid Metabolism                                               | 1   | 1 |
| K00121                                                  | frmA, ADH5, adhC      | S-(hydroxymethyl)glutathione dehydrogenase / alcohol dehydrogenase [EC:1.1.1.284 1.1.1.1] | Carbohydrate Metabolism - Metabolism of Cofactors and Vitamins - Xenobiotics Biodegradation and Metabolism - Amino Acid Metabolism - Lipid Metabolism - Energy Metabolism                           | 8   | 3 |
| K00257                                                  | E1.3.99.-             |                                                                                           | Xenobiotics Biodegradation and Metabolism - Metabolism of Terpenoids and Polyketides                                                                                                                | 2   | 2 |
| K00680                                                  | E2.3.1.-              |                                                                                           | Xenobiotics Biodegradation and Metabolism - Metabolism of Terpenoids and Polyketides - Amino Acid Metabolism                                                                                        | 9   | 1 |
| K01726                                                  | E4.2.1.-              |                                                                                           | Carbohydrate Metabolism - Xenobiotics Biodegradation and Metabolism - Metabolism of Terpenoids and Polyketides                                                                                      | 1   | 1 |
| K13953                                                  | adhP                  | alcohol dehydrogenase, propanol-preferring [EC:1.1.1.1]                                   | Carbohydrate Metabolism - Metabolism of Cofactors and Vitamins - Xenobiotics Biodegradation and Metabolism - Amino Acid Metabolism - Lipid Metabolism                                               | 1   | 1 |
| ko00627_Aminobenzoate degradation                       |                       |                                                                                           |                                                                                                                                                                                                     |     |   |
| K00680                                                  | E2.3.1.-              |                                                                                           | Xenobiotics Biodegradation and Metabolism - Metabolism of Terpenoids and Polyketides - Amino Acid Metabolism                                                                                        | 9   | 1 |
| K01426                                                  | E3.5.1.4, amE         | amidase [EC:3.5.1.4]                                                                      | Metabolism of Other Amino Acids - Xenobiotics Biodegradation and Metabolism - Amino Acid Metabolism                                                                                                 | 3   | 1 |
| K01501                                                  | E3.5.5.1              | nitrilase [EC:3.5.5.1]                                                                    | Metabolism of Other Amino Acids - Xenobiotics Biodegradation and Metabolism - Amino Acid Metabolism - Energy Metabolism                                                                             | 1   | 1 |

|                                                 |                             |                                                                                                                                                     |                                                                                                                                                                                                                 |     |   |
|-------------------------------------------------|-----------------------------|-----------------------------------------------------------------------------------------------------------------------------------------------------|-----------------------------------------------------------------------------------------------------------------------------------------------------------------------------------------------------------------|-----|---|
| K01692                                          | E4.2.1.17, paaG             | enoyl-CoA hydratase [EC:4.2.1.17]                                                                                                                   | Carbohydrate Metabolism - Metabolism of Other Amino Acids - Xenobiotics Biodegradation and Metabolism - Metabolism of Terpenoids and Polyketides - Amino Acid Metabolism - Lipid Metabolism                     | 33  | 3 |
| K09474                                          | phoN                        | acid phosphatase (class A) [EC:3.1.3.2]                                                                                                             | Signal Transduction - Metabolism of Cofactors and Vitamins - Xenobiotics Biodegradation and Metabolism                                                                                                          | 8   | 2 |
| ko00630_Glyoxylate and dicarboxylate metabolism |                             |                                                                                                                                                     |                                                                                                                                                                                                                 |     |   |
| K00023                                          | E1.1.1.36, phbB             | acetoacetyl-CoA reductase [EC:1.1.1.36]                                                                                                             | Carbohydrate Metabolism                                                                                                                                                                                         | 3   | 2 |
| K00024                                          | mdh                         | malate dehydrogenase [EC:1.1.1.37]                                                                                                                  | Carbohydrate Metabolism - Energy Metabolism                                                                                                                                                                     | 3   | 3 |
| K00050                                          | E1.1.1.81, ttuD             | hydroxypyruvate reductase [EC:1.1.1.81]                                                                                                             | Carbohydrate Metabolism - Amino Acid Metabolism                                                                                                                                                                 | 1   | 1 |
| K00104                                          | glcD                        | glycolate oxidase [EC:1.1.3.15]                                                                                                                     | Carbohydrate Metabolism                                                                                                                                                                                         | 1   | 1 |
| K00123                                          | E1.2.1.2A                   | formate dehydrogenase, alpha subunit [EC:1.2.1.2]                                                                                                   | Carbohydrate Metabolism - Energy Metabolism                                                                                                                                                                     | 2   | 2 |
| K00626                                          | E2.3.1.9, atoB              | acetyl-CoA C-acetyltransferase [EC:2.3.1.9]                                                                                                         | Carbohydrate Metabolism - Signal Transduction - Xenobiotics Biodegradation and Metabolism - Metabolism of Terpenoids and Polyketides - Amino Acid Metabolism - Lipid Metabolism - Energy Metabolism             | 4   | 3 |
| K01091                                          | E3.1.3.18, gph              | phosphoglycolate phosphatase [EC:3.1.3.18]                                                                                                          | Carbohydrate Metabolism                                                                                                                                                                                         | 1   | 1 |
| K01433                                          | purU                        | formyltetrahydrofolate deformylase [EC:3.5.1.10]                                                                                                    | Carbohydrate Metabolism - Metabolism of Cofactors and Vitamins                                                                                                                                                  | 1   | 1 |
| K01601                                          | rbcL                        | ribulose-bisphosphate carboxylase large chain [EC:4.1.1.39]                                                                                         | Carbohydrate Metabolism - Energy Metabolism                                                                                                                                                                     | 6   | 3 |
| K01637                                          | E4.1.3.1, aceA              | isocitrate lyase [EC:4.1.3.1]                                                                                                                       | Carbohydrate Metabolism                                                                                                                                                                                         | 9   | 3 |
| K01638                                          | E2.3.3.9, aceB, glcB        | malate synthase [EC:2.3.3.9]                                                                                                                        | Carbohydrate Metabolism                                                                                                                                                                                         | 9   | 3 |
| K01681                                          | ACO, acnA                   | aconitate hydratase 1 [EC:4.2.1.3]                                                                                                                  | Carbohydrate Metabolism - Energy Metabolism                                                                                                                                                                     | 4   | 3 |
| K01847                                          | MUT                         | methylmalonyl-CoA mutase [EC:5.4.99.2]                                                                                                              | Carbohydrate Metabolism - Amino Acid Metabolism - Energy Metabolism                                                                                                                                             | 2   | 2 |
| K11472                                          | glcE                        | glycolate oxidase FAD binding subunit                                                                                                               | Carbohydrate Metabolism                                                                                                                                                                                         | 2   | 1 |
| ko00633_Nitrotoluene degradation                |                             |                                                                                                                                                     |                                                                                                                                                                                                                 |     |   |
| K06281                                          | E1.12.99.6L                 | hydrogenase large subunit [EC:1.12.99.6]                                                                                                            | Xenobiotics Biodegradation and Metabolism                                                                                                                                                                       | 1   | 1 |
| K11180                                          | dsrA                        | sulfite reductase, dissimilatory-type alpha subunit [EC:1.8.99.3]                                                                                   | Xenobiotics Biodegradation and Metabolism                                                                                                                                                                       | 2   | 1 |
| ko00640_Propanoate metabolism                   |                             |                                                                                                                                                     |                                                                                                                                                                                                                 |     |   |
| K00128                                          | E1.2.1.3                    | aldehyde dehydrogenase (NAD+) [EC:1.2.1.3]                                                                                                          | Carbohydrate Metabolism - Metabolism of Other Amino Acids - Xenobiotics Biodegradation and Metabolism - Metabolism of Terpenoids and Polyketides - Amino Acid Metabolism - Lipid Metabolism                     | 4   | 4 |
| K00140                                          | E1.2.1.27, mmsA, ioIA       | methylmalonate-semialdehyde dehydrogenase [EC:1.2.1.27]                                                                                             | Carbohydrate Metabolism - Amino Acid Metabolism                                                                                                                                                                 | 1   | 1 |
| K00249                                          | E1.3.99.3, ACADM, acd       | acyl-CoA dehydrogenase [EC:1.3.99.3]                                                                                                                | Carbohydrate Metabolism - Metabolism of Other Amino Acids - Endocrine System - Amino Acid Metabolism - Lipid Metabolism                                                                                         | 1   | 1 |
| K00626                                          | E2.3.1.9, atoB              | acetyl-CoA C-acetyltransferase [EC:2.3.1.9]                                                                                                         | Carbohydrate Metabolism - Signal Transduction - Xenobiotics Biodegradation and Metabolism - Metabolism of Terpenoids and Polyketides - Amino Acid Metabolism - Lipid Metabolism - Energy Metabolism             | 4   | 3 |
| K00823                                          | puuE                        | 4-aminobutyrate aminotransferase [EC:2.6.1.19]                                                                                                      | Carbohydrate Metabolism - Metabolism of Other Amino Acids - Amino Acid Metabolism                                                                                                                               | 1   | 1 |
| K01604                                          | mmdA                        | methylmalonyl-CoA decarboxylase alpha chain [EC:4.1.1.41]                                                                                           | Carbohydrate Metabolism                                                                                                                                                                                         | 1   | 1 |
| K01659                                          | E2.3.3.5, prpC              | 2-methylcitrate synthase [EC:2.3.3.5]                                                                                                               | Carbohydrate Metabolism                                                                                                                                                                                         | 1   | 1 |
| K01692                                          | E4.2.1.17, paaG             | enoyl-CoA hydratase [EC:4.2.1.17]                                                                                                                   | Carbohydrate Metabolism - Metabolism of Other Amino Acids - Xenobiotics Biodegradation and Metabolism - Metabolism of Terpenoids and Polyketides - Amino Acid Metabolism - Lipid Metabolism                     | 33  | 3 |
| K01825                                          | fadB                        | 3-hydroxyacyl-CoA dehydrogenase / enoyl-CoA hydratase / 3-hydroxybutyryl-CoA epimerase / enoyl-CoA isomerase [EC:1.1.1.35 4.2.1.17 5.1.2.3 5.3.3.8] | Carbohydrate Metabolism - Metabolism of Other Amino Acids - Xenobiotics Biodegradation and Metabolism - Metabolism of Terpenoids and Polyketides - Amino Acid Metabolism - Lipid Metabolism - Energy Metabolism | 1   | 1 |
| K01847                                          | MUT                         | methylmalonyl-CoA mutase [EC:5.4.99.2]                                                                                                              | Carbohydrate Metabolism - Amino Acid Metabolism - Energy Metabolism                                                                                                                                             | 2   | 2 |
| K01848                                          | E5.4.99.2A, mcmA1           | methylmalonyl-CoA mutase, N-terminal domain [EC:5.4.99.2]                                                                                           | Carbohydrate Metabolism - Amino Acid Metabolism - Energy Metabolism                                                                                                                                             | 1   | 1 |
| K01895                                          | ACSS, acs                   | acetyl-CoA synthetase [EC:6.2.1.1]                                                                                                                  | Carbohydrate Metabolism - Lipid Metabolism - Energy Metabolism                                                                                                                                                  | 1   | 1 |
| K01962                                          | accA                        | acetyl-CoA carboxylase carboxyl transferase subunit alpha [EC:6.4.1.2]                                                                              | Carbohydrate Metabolism - Metabolism of Terpenoids and Polyketides - Lipid Metabolism - Energy Metabolism                                                                                                       | 1   | 1 |
| K01963                                          | accD                        | acetyl-CoA carboxylase carboxyl transferase subunit beta [EC:6.4.1.2]                                                                               | Carbohydrate Metabolism - Metabolism of Terpenoids and Polyketides - Lipid Metabolism - Energy Metabolism                                                                                                       | 2   | 2 |
| K07250                                          | gabT                        | 4-aminobutyrate aminotransferase / (S)-3-amino-2-methylpropionate transaminase [EC:2.6.1.19 2.6.1.22]                                               | Carbohydrate Metabolism - Metabolism of Other Amino Acids - Amino Acid Metabolism                                                                                                                               | 1   | 1 |
| ko00642_Ethylbenzene degradation                |                             |                                                                                                                                                     |                                                                                                                                                                                                                 |     |   |
| K00529                                          | hcaD                        | ferredoxin-NAD+ reductase [EC:1.18.1.3]                                                                                                             | Xenobiotics Biodegradation and Metabolism - Amino Acid Metabolism - Lipid Metabolism                                                                                                                            | 1   | 1 |
| K00680                                          | E2.3.1.-                    |                                                                                                                                                     | Xenobiotics Biodegradation and Metabolism - Metabolism of Terpenoids and Polyketides - Amino Acid Metabolism                                                                                                    | 9   | 1 |
| ko00643_Styrene degradation                     |                             |                                                                                                                                                     |                                                                                                                                                                                                                 |     |   |
| K01426                                          | E3.5.1.4, amE               | amidase [EC:3.5.1.4]                                                                                                                                | Metabolism of Other Amino Acids - Xenobiotics Biodegradation and Metabolism - Amino Acid Metabolism                                                                                                             | 3   | 1 |
| K01501                                          | E3.5.5.1                    | nitrilase [EC:3.5.5.1]                                                                                                                              | Metabolism of Other Amino Acids - Xenobiotics Biodegradation and Metabolism - Amino Acid Metabolism - Energy Metabolism                                                                                         | 1   | 1 |
| ko00650_Butanoate metabolism                    |                             |                                                                                                                                                     |                                                                                                                                                                                                                 |     |   |
| K00023                                          | E1.1.1.36, phbB             | acetoacetyl-CoA reductase [EC:1.1.1.36]                                                                                                             | Carbohydrate Metabolism                                                                                                                                                                                         | 3   | 2 |
| K00100                                          | E1.1.1.-                    |                                                                                                                                                     | Carbohydrate Metabolism - Xenobiotics Biodegradation and Metabolism - Lipid Metabolism                                                                                                                          | 1   | 1 |
| K00135                                          | E1.2.1.16, gabD             | succinate-semialdehyde dehydrogenase (NADP+) [EC:1.2.1.16]                                                                                          | Carbohydrate Metabolism - Amino Acid Metabolism                                                                                                                                                                 | 2   | 1 |
| K00161                                          | PDHA, pdhA                  | pyruvate dehydrogenase E1 component subunit alpha [EC:1.2.4.1]                                                                                      | Carbohydrate Metabolism - Amino Acid Metabolism                                                                                                                                                                 | 57  | 3 |
| K00162                                          | PDHB, pdhB                  | pyruvate dehydrogenase E1 component subunit beta [EC:1.2.4.1]                                                                                       | Carbohydrate Metabolism - Amino Acid Metabolism                                                                                                                                                                 | 37  | 3 |
| K00239                                          | sdhA                        | succinate dehydrogenase flavoprotein subunit [EC:1.3.99.1]                                                                                          | Carbohydrate Metabolism - Xenobiotics Biodegradation and Metabolism - Energy Metabolism                                                                                                                         | 2   | 2 |
| K00240                                          | sdhB                        | succinate dehydrogenase iron-sulfur protein [EC:1.3.99.1]                                                                                           | Carbohydrate Metabolism - Xenobiotics Biodegradation and Metabolism - Energy Metabolism                                                                                                                         | 18  | 1 |
| K00626                                          | E2.3.1.9, atoB              | acetyl-CoA C-acetyltransferase [EC:2.3.1.9]                                                                                                         | Carbohydrate Metabolism - Signal Transduction - Xenobiotics Biodegradation and Metabolism - Metabolism of Terpenoids and Polyketides - Amino Acid Metabolism - Lipid Metabolism - Energy Metabolism             | 4   | 3 |
| K00823                                          | puuE                        | 4-aminobutyrate aminotransferase [EC:2.6.1.19]                                                                                                      | Carbohydrate Metabolism - Metabolism of Other Amino Acids - Amino Acid Metabolism                                                                                                                               | 1   | 1 |
| K01640                                          | E4.1.3.4, HMGC, hmgl        | hydroxymethylglutaryl-CoA lyase [EC:4.1.3.4]                                                                                                        | Carbohydrate Metabolism - Transport and Catabolism - Metabolism of Terpenoids and Polyketides - Amino Acid Metabolism - Lipid Metabolism                                                                        | 18  | 1 |
| K01652                                          | E2.2.1.6L, ilvB, ilvG, ilvI | acetylacetyl synthase I/II/III large subunit [EC:2.2.1.6]                                                                                           | Carbohydrate Metabolism - Metabolism of Cofactors and Vitamins - Amino Acid Metabolism                                                                                                                          | 300 | 5 |
| K01692                                          | E4.2.1.17, paaG             | enoyl-CoA hydratase [EC:4.2.1.17]                                                                                                                   | Carbohydrate Metabolism - Metabolism of Other Amino Acids - Xenobiotics Biodegradation and Metabolism - Metabolism of Terpenoids and Polyketides - Amino Acid Metabolism - Lipid Metabolism                     | 33  | 3 |
| K01726                                          | E4.2.1.-                    |                                                                                                                                                     | Carbohydrate Metabolism - Xenobiotics Biodegradation and Metabolism - Metabolism of Terpenoids and Polyketides                                                                                                  | 1   | 1 |
| K01825                                          | fadB                        | 3-hydroxyacyl-CoA dehydrogenase / enoyl-CoA hydratase / 3-hydroxybutyryl-CoA epimerase / enoyl-CoA isomerase [EC:1.1.1.35 4.2.1.17 5.1.2.3 5.3.3.8] | Carbohydrate Metabolism - Metabolism of Other Amino Acids - Xenobiotics Biodegradation and Metabolism - Metabolism of Terpenoids and Polyketides - Amino Acid Metabolism - Lipid Metabolism - Energy Metabolism | 1   | 1 |
| K03821                                          | phbC, phaC                  | polyhydroxyalkanoate synthase [EC:2.3.1.-]                                                                                                          | Carbohydrate Metabolism                                                                                                                                                                                         | 1   | 1 |
| K04073                                          | mhpF                        | acetaldehyde dehydrogenase [EC:1.2.1.10]                                                                                                            | Carbohydrate Metabolism - Xenobiotics Biodegradation and Metabolism                                                                                                                                             | 43  | 2 |
| K07250                                          | gabT                        | 4-aminobutyrate aminotransferase / (S)-3-amino-2-methylpropionate transaminase [EC:2.6.1.19 2.6.1.22]                                               | Carbohydrate Metabolism - Metabolism of Other Amino Acids - Amino Acid Metabolism                                                                                                                               | 1   | 1 |
| ko00660_C5-Branched dibasic acid metabolism     |                             |                                                                                                                                                     |                                                                                                                                                                                                                 |     |   |
| K01652                                          | E2.2.1.6L, ilvB, ilvG, ilvI | acetylacetyl synthase I/II/III large subunit [EC:2.2.1.6]                                                                                           | Carbohydrate Metabolism - Metabolism of Cofactors and Vitamins - Amino Acid Metabolism                                                                                                                          | 300 | 5 |
| K01703                                          | leuC                        | 3-isopropylmalate(R)-2-methylmalate dehydratase large subunit [EC:4.2.1.33 4.2.1.35]                                                                | Carbohydrate Metabolism - Amino Acid Metabolism                                                                                                                                                                 | 2   | 2 |
| K01704                                          | leuD                        | 3-isopropylmalate(R)-2-methylmalate dehydratase small subunit [EC:4.2.1.33 4.2.1.35]                                                                | Carbohydrate Metabolism - Amino Acid Metabolism                                                                                                                                                                 | 1   | 1 |
| ko00670_One carbon pool by folate               |                             |                                                                                                                                                     |                                                                                                                                                                                                                 |     |   |
| K00287                                          | folA                        | dihydrofolate reductase [EC:1.5.1.3]                                                                                                                | Metabolism of Cofactors and Vitamins                                                                                                                                                                            | 4   | 3 |
| K00297                                          | E1.5.1.20, metF             | methylene tetrahydrofolate reductase (NADPH) [EC:1.5.1.20]                                                                                          | Metabolism of Cofactors and Vitamins - Energy Metabolism                                                                                                                                                        | 1   | 1 |
| K00548                                          | E2.1.1.13, methF            | 5-methyltetrahydrofolate-homocysteine methyltransferase [EC:2.1.1.13]                                                                               | Metabolism of Other Amino Acids - Metabolism of Cofactors and Vitamins - Amino Acid Metabolism                                                                                                                  | 23  | 5 |
| K00560                                          | E2.1.1.45, thyA             | thymidylate synthase [EC:2.1.1.45]                                                                                                                  | Metabolism of Cofactors and Vitamins - Nucleotide Metabolism                                                                                                                                                    | 528 | 9 |
| K00600                                          | E2.1.2.1, glyA              | glycine hydroxymethyltransferase [EC:2.1.2.1]                                                                                                       | Metabolism of Other Amino Acids - Metabolism of Cofactors and Vitamins - Amino Acid Metabolism - Energy Metabolism                                                                                              | 25  | 4 |
| K00604                                          | MTFMT, frmT                 | methylionyl-TRNA formyltransferase [EC:2.1.2.9]                                                                                                     | Translation - Metabolism of Cofactors and Vitamins                                                                                                                                                              | 50  | 5 |
| K00605                                          | E2.1.2.10, gcvT             | aminomethyltransferase [EC:2.1.2.10]                                                                                                                | Metabolism of Cofactors and Vitamins - Amino Acid Metabolism - Energy Metabolism                                                                                                                                | 2   | 2 |
| K01433                                          | purU                        | formyltetrahydrofolate deformylase [EC:3.5.1.10]                                                                                                    | Carbohydrate Metabolism - Metabolism of Cofactors and Vitamins                                                                                                                                                  | 1   | 1 |
| K01938                                          | fts                         | formate-tetrahydrofolate ligase [EC:6.3.4.3]                                                                                                        | Metabolism of Cofactors and Vitamins - Energy Metabolism                                                                                                                                                        | 1   | 1 |

|                                                     |                             |                                                                                                                                                   |                                                                                                                                                                                                                 |      |   |
|-----------------------------------------------------|-----------------------------|---------------------------------------------------------------------------------------------------------------------------------------------------|-----------------------------------------------------------------------------------------------------------------------------------------------------------------------------------------------------------------|------|---|
| K03465                                              | E2.1.1.148, thyX, thy1      | thymidylate synthase (FAD) [EC:2.1.1.148]                                                                                                         | Metabolism of Cofactors and Vitamins - Nucleotide Metabolism                                                                                                                                                    | 1150 | 7 |
| K11175                                              | purN                        | phosphoribosylglycinamide formyltransferase 1 [EC:2.1.2.2]                                                                                        | Metabolism of Cofactors and Vitamins - Nucleotide Metabolism                                                                                                                                                    | 12   | 2 |
| ko00680_Methane metabolism                          |                             |                                                                                                                                                   |                                                                                                                                                                                                                 |      |   |
| K00024                                              | mdh                         | malate dehydrogenase [EC:1.1.1.37]                                                                                                                | Carbohydrate Metabolism - Energy Metabolism                                                                                                                                                                     | 3    | 3 |
| K00058                                              | serA, PHGDH                 | D-3-phosphoglycerate dehydrogenase [EC:1.1.1.95]                                                                                                  | Amino Acid Metabolism - Energy Metabolism                                                                                                                                                                       | 2    | 1 |
| K00121                                              | frmA, ADH5, adhC            | S-hydroxymethylglutathione dehydrogenase / alcohol dehydrogenase [EC:1.1.1.284 1.1.1.1]                                                           | Carbohydrate Metabolism - Metabolism of Cofactors and Vitamins - Xenobiotics Biodegradation and Metabolism - Amino Acid Metabolism - Lipid Metabolism - Energy Metabolism                                       | 8    | 3 |
| K00123                                              | E1.2.1.2A                   | formate dehydrogenase, alpha subunit [EC:1.2.1.2]                                                                                                 | Carbohydrate Metabolism - Energy Metabolism                                                                                                                                                                     | 2    | 2 |
| K00201                                              | E1.2.99.5B, fwdB, fwdB      | formylmethanofuran dehydrogenase subunit B [EC:1.2.99.5]                                                                                          | Energy Metabolism                                                                                                                                                                                               | 1    | 1 |
| K00297                                              | E1.5.1.20, metF             | methylenetetrahydrofolate reductase (NADPH) [EC:1.5.1.20]                                                                                         | Metabolism of Cofactors and Vitamins - Energy Metabolism                                                                                                                                                        | 1    | 1 |
| K00600                                              | E2.1.2.1, glyA              | glycine hydroxymethyltransferase [EC:2.1.2.1]                                                                                                     | Metabolism of Other Amino Acids - Metabolism of Cofactors and Vitamins - Amino Acid Metabolism - Energy Metabolism                                                                                              | 25   | 4 |
| K00831                                              | serC, PSAT1                 | phosphoserine aminotransferase [EC:2.6.1.52]                                                                                                      | Metabolism of Cofactors and Vitamins - Amino Acid Metabolism - Energy Metabolism                                                                                                                                | 2    | 1 |
| K01007                                              | pps, ppsA                   | pyruvate, water dikinase [EC:2.7.9.2]                                                                                                             | Carbohydrate Metabolism - Energy Metabolism                                                                                                                                                                     | 107  | 4 |
| K01079                                              | serB, PSPH                  | phosphoserine phosphatase [EC:3.1.3.3]                                                                                                            | Amino Acid Metabolism - Energy Metabolism                                                                                                                                                                       | 4    | 3 |
| K01595                                              | ppc                         | phosphoenolpyruvate carboxylase [EC:4.1.1.31]                                                                                                     | Carbohydrate Metabolism - Energy Metabolism                                                                                                                                                                     | 1    | 1 |
| K01624                                              | FBA, fbaA                   | fructose-bisphosphate aldolase, class II [EC:4.1.2.13]                                                                                            | Carbohydrate Metabolism - Energy Metabolism                                                                                                                                                                     | 2    | 1 |
| K01895                                              | ACSS, acs                   | acetyl-CoA synthetase [EC:6.2.1.1]                                                                                                                | Carbohydrate Metabolism - Lipid Metabolism - Energy Metabolism                                                                                                                                                  | 1    | 1 |
| K02118                                              | ATPB, ntpB                  | V-type H <sup>+</sup> -transporting ATPase subunit B [EC:3.6.3.14]                                                                                | Energy Metabolism                                                                                                                                                                                               | 1    | 1 |
| K02203                                              | thrH                        | phosphoserine / homoserine phosphotransferase [EC:3.1.3.3.2.7.1.39]                                                                               | Amino Acid Metabolism - Energy Metabolism                                                                                                                                                                       | 1    | 1 |
| K03781                                              | katE, CAT                   | catalase [EC:1.11.1.6]                                                                                                                            | Neurodegenerative Diseases - Transport and Catabolism - Amino Acid Metabolism - Energy Metabolism                                                                                                               | 1    | 1 |
| K03782                                              | katG                        | catalase/oxidase [EC:1.11.1.6 1.11.1.7]                                                                                                           | Biosynthesis of Other Secondary Metabolites - Amino Acid Metabolism - Energy Metabolism                                                                                                                         | 9    | 1 |
| K14940                                              | cofF                        | gamma-F420:alpha-L-glutamate ligase [EC:6.3.2.32]                                                                                                 | Energy Metabolism                                                                                                                                                                                               | 1    | 1 |
| ko00710_Carbon fixation in photosynthetic organisms |                             |                                                                                                                                                   |                                                                                                                                                                                                                 |      |   |
| K00024                                              | mdh                         | malate dehydrogenase [EC:1.1.1.37]                                                                                                                | Carbohydrate Metabolism - Energy Metabolism                                                                                                                                                                     | 3    | 3 |
| K00029                                              | E1.1.1.40, maeB             | malate dehydrogenase (oxaloacetate-decarboxylating)(NADP+) [EC:1.1.1.40]                                                                          | Carbohydrate Metabolism - Energy Metabolism                                                                                                                                                                     | 2    | 1 |
| K00615                                              | E2.2.1.1, tktA, tktB        | transketolase [EC:2.2.1.1]                                                                                                                        | Carbohydrate Metabolism - Metabolism of Terpenoids and Polyketides - Energy Metabolism                                                                                                                          | 59   | 3 |
| K00812                                              | E2.6.1.1A, aspB             | aspartate aminotransferase [EC:2.6.1.1]                                                                                                           | Biosynthesis of Other Secondary Metabolites - Amino Acid Metabolism - Energy Metabolism                                                                                                                         | 46   | 3 |
| K00927                                              | PGK, pgk                    | phosphoglycerate kinase [EC:2.7.2.3]                                                                                                              | Carbohydrate Metabolism - Energy Metabolism                                                                                                                                                                     | 2    | 1 |
| K01006                                              | ppdK                        | pyruvate, orthophosphate dikinase [EC:2.7.9.1]                                                                                                    | Carbohydrate Metabolism - Energy Metabolism                                                                                                                                                                     | 1    | 1 |
| K01595                                              | ppc                         | phosphoenolpyruvate carboxylase [EC:4.1.1.31]                                                                                                     | Carbohydrate Metabolism - Energy Metabolism                                                                                                                                                                     | 1    | 1 |
| K01601                                              | ribL                        | ribulose-bisphosphate carboxylase large chain [EC:4.1.1.39]                                                                                       | Carbohydrate Metabolism - Energy Metabolism                                                                                                                                                                     | 6    | 3 |
| K01610                                              | E4.1.1.49, pckA             | phosphoenolpyruvate carboxykinase (ATP) [EC:4.1.1.49]                                                                                             | Carbohydrate Metabolism - Energy Metabolism                                                                                                                                                                     | 4    | 2 |
| K01623                                              | ALDO, fbaB                  | fructose-bisphosphate aldolase, class I [EC:4.1.2.13]                                                                                             | Carbohydrate Metabolism - Energy Metabolism                                                                                                                                                                     | 12   | 1 |
| K01624                                              | FBA, fbaA                   | fructose-bisphosphate aldolase, class II [EC:4.1.2.13]                                                                                            | Carbohydrate Metabolism - Energy Metabolism                                                                                                                                                                     | 2    | 1 |
| K01783                                              | rpe, RPE                    | ribulose-phosphate 3-epimerase [EC:5.1.3.1]                                                                                                       | Carbohydrate Metabolism - Energy Metabolism                                                                                                                                                                     | 1    | 1 |
| K01808                                              | E5.3.1.6B, rpiB             | ribose 5-phosphate isomerase B [EC:5.3.1.6]                                                                                                       | Carbohydrate Metabolism - Energy Metabolism                                                                                                                                                                     | 10   | 3 |
| K04041                                              | fbp3                        | fructose-1,6-bisphosphatase III [EC:3.1.3.11]                                                                                                     | Carbohydrate Metabolism - Energy Metabolism                                                                                                                                                                     | 1    | 1 |
| ko00720_Carbon fixation pathways in prokaryotes     |                             |                                                                                                                                                   |                                                                                                                                                                                                                 |      |   |
| K00024                                              | mdh                         | malate dehydrogenase [EC:1.1.1.37]                                                                                                                | Carbohydrate Metabolism - Energy Metabolism                                                                                                                                                                     | 3    | 3 |
| K00174                                              | korA                        | 2-oxoglutarate ferredoxin oxidoreductase subunit alpha [EC:1.2.7.3]                                                                               | Carbohydrate Metabolism - Energy Metabolism                                                                                                                                                                     | 1    | 1 |
| K00175                                              | korB                        | 2-oxoglutarate ferredoxin oxidoreductase subunit beta [EC:1.2.7.3]                                                                                | Carbohydrate Metabolism - Energy Metabolism                                                                                                                                                                     | 2    | 2 |
| K00239                                              | sdhA                        | succinate dehydrogenase flavoprotein subunit [EC:1.3.99.1]                                                                                        | Carbohydrate Metabolism - Xenobiotics Biodegradation and Metabolism - Energy Metabolism                                                                                                                         | 2    | 2 |
| K00240                                              | sdhB                        | succinate dehydrogenase iron-sulfur protein [EC:1.3.99.1]                                                                                         | Carbohydrate Metabolism - Xenobiotics Biodegradation and Metabolism - Energy Metabolism                                                                                                                         | 18   | 1 |
| K00297                                              | E1.5.1.20, metF             | methylenetetrahydrofolate reductase (NADPH) [EC:1.5.1.20]                                                                                         | Metabolism of Cofactors and Vitamins - Energy Metabolism                                                                                                                                                        | 1    | 1 |
| K00626                                              | E2.3.1.9, atoB              | acetyl-CoA C-acetyltransferase [EC:2.3.1.9]                                                                                                       | Carbohydrate Metabolism - Signal Transduction - Xenobiotics Biodegradation and Metabolism - Metabolism of Terpenoids and Polyketides - Amino Acid Metabolism - Lipid Metabolism - Energy Metabolism             | 4    | 3 |
| K01007                                              | pps, ppsA                   | pyruvate, water dikinase [EC:2.7.9.2]                                                                                                             | Carbohydrate Metabolism - Energy Metabolism                                                                                                                                                                     | 107  | 4 |
| K01595                                              | ppc                         | phosphoenolpyruvate carboxylase [EC:4.1.1.31]                                                                                                     | Carbohydrate Metabolism - Energy Metabolism                                                                                                                                                                     | 1    | 1 |
| K01681                                              | ACO, acnA                   | aconitate hydratase 1 [EC:4.2.1.3]                                                                                                                | Carbohydrate Metabolism - Energy Metabolism                                                                                                                                                                     | 4    | 3 |
| K01825                                              | fadB                        | 3-hydroxyacyl-CoA dehydrogenase / enoyl-CoA hydratase / 3-hydroxybutyryl-CoA epimerase / enoyl-CoA isomerase [EC:1.1.35.4.2.1.17 5.1.2.3 5.3.3.8] | Carbohydrate Metabolism - Metabolism of Other Amino Acids - Xenobiotics Biodegradation and Metabolism - Metabolism of Terpenoids and Polyketides - Amino Acid Metabolism - Lipid Metabolism - Energy Metabolism | 1    | 1 |
| K01847                                              | MUT                         | methylmalonyl-CoA mutase [EC:5.4.99.2]                                                                                                            | Carbohydrate Metabolism - Amino Acid Metabolism - Energy Metabolism                                                                                                                                             | 2    | 2 |
| K01848                                              | E5.4.99.2A, mcmA1           | methylmalonyl-CoA mutase, N-terminal domain [EC:5.4.99.2]                                                                                         | Carbohydrate Metabolism - Amino Acid Metabolism - Energy Metabolism                                                                                                                                             | 1    | 1 |
| K01895                                              | ACSS, acs                   | acetyl-CoA synthetase [EC:6.2.1.1]                                                                                                                | Carbohydrate Metabolism - Lipid Metabolism - Energy Metabolism                                                                                                                                                  | 1    | 1 |
| K01938                                              | fts                         | formate-tetrahydrofolate ligase [EC:6.3.4.3]                                                                                                      | Metabolism of Cofactors and Vitamins - Energy Metabolism                                                                                                                                                        | 1    | 1 |
| K01962                                              | accA                        | acetyl-CoA carboxylase carboxyl transferase subunit alpha [EC:6.4.1.2]                                                                            | Carbohydrate Metabolism - Metabolism of Terpenoids and Polyketides - Lipid Metabolism - Energy Metabolism                                                                                                       | 1    | 1 |
| K01963                                              | accD                        | acetyl-CoA carboxylase carboxyl transferase subunit beta [EC:6.4.1.2]                                                                             | Carbohydrate Metabolism - Metabolism of Terpenoids and Polyketides - Lipid Metabolism - Energy Metabolism                                                                                                       | 2    | 2 |
| ko00730_Thiamine metabolism                         |                             |                                                                                                                                                   |                                                                                                                                                                                                                 |      |   |
| K00788                                              | thiE                        | thiamine-phosphate pyrophosphorylation [EC:2.5.1.3]                                                                                               | Metabolism of Cofactors and Vitamins                                                                                                                                                                            | 88   | 1 |
| K03707                                              | tenA                        | thiaminase (transcriptional activator TenA) [EC:3.5.99.2]                                                                                         | Transcription - Metabolism of Cofactors and Vitamins                                                                                                                                                            | 2    | 1 |
| K04487                                              | iscS, NFS1                  | cysteine desulfurase [EC:2.8.1.7]                                                                                                                 | Folding, Sorting and Degradation - Metabolism of Cofactors and Vitamins                                                                                                                                         | 4    | 3 |
| K11717                                              | suS                         | cysteine desulfurase / selenocysteine lyase [EC:2.8.1.7 4.4.1.16]                                                                                 | Metabolism of Other Amino Acids - Metabolism of Cofactors and Vitamins                                                                                                                                          | 1    | 1 |
| ko00740_Riboflavin metabolism                       |                             |                                                                                                                                                   |                                                                                                                                                                                                                 |      |   |
| K01497                                              | ribA, RIB1                  | GTP cyclohydrolase II [EC:3.5.4.25]                                                                                                               | Metabolism of Cofactors and Vitamins                                                                                                                                                                            | 1    | 1 |
| K09474                                              | phoN                        | acid phosphatase (class A) [EC:3.1.3.2]                                                                                                           | Signal Transduction - Metabolism of Cofactors and Vitamins - Xenobiotics Biodegradation and Metabolism                                                                                                          | 8    | 2 |
| K11753                                              | ribF                        | riboflavin kinase / FMN adenylyltransferase [EC:2.7.1.26 2.7.7.2]                                                                                 | Metabolism of Cofactors and Vitamins                                                                                                                                                                            | 3    | 2 |
| K14652                                              | ribBA                       | 3,4-dihydroxy-2-butanone 4-phosphate synthase / GTP cyclohydrolase II [EC:4.1.99.12 3.5.4.25]                                                     | Metabolism of Cofactors and Vitamins                                                                                                                                                                            | 4    | 2 |
| K14656                                              | ribL                        | FAD synthetase                                                                                                                                    | Metabolism of Cofactors and Vitamins                                                                                                                                                                            | 27   | 3 |
| ko00750_Vitamin B6 metabolism                       |                             |                                                                                                                                                   |                                                                                                                                                                                                                 |      |   |
| K00275                                              | pxbH, PNPO                  | pyridoxamine 5'-phosphate oxidase [EC:1.4.3.5]                                                                                                    | Metabolism of Cofactors and Vitamins                                                                                                                                                                            | 1    | 1 |
| K00831                                              | serC, PSAT1                 | phosphoserine aminotransferase [EC:2.6.1.52]                                                                                                      | Metabolism of Cofactors and Vitamins - Amino Acid Metabolism - Energy Metabolism                                                                                                                                | 2    | 1 |
| ko00760_Nicotinate and nicotinamide metabolism      |                             |                                                                                                                                                   |                                                                                                                                                                                                                 |      |   |
| K00278                                              | nadB                        | L-aspartate oxidase [EC:1.4.3.16]                                                                                                                 | Metabolism of Cofactors and Vitamins - Amino Acid Metabolism                                                                                                                                                    | 1    | 1 |
| K00325                                              | prtB                        | NAD(P) transhydrogenase subunit beta [EC:1.6.1.2]                                                                                                 | Metabolism of Cofactors and Vitamins                                                                                                                                                                            | 1    | 1 |
| K00763                                              | E2.4.2.11, pncB             | nicotinate phosphoribosyltransferase [EC:2.4.2.11]                                                                                                | Metabolism of Cofactors and Vitamins                                                                                                                                                                            | 11   | 3 |
| K00969                                              | nadD                        | nicotinate-nucleotide adenylyltransferase [EC:2.7.7.18]                                                                                           | Metabolism of Cofactors and Vitamins                                                                                                                                                                            | 5    | 2 |
| K01081                                              | E3.1.3.5                    | 5'-nucleotidase [EC:3.1.3.5]                                                                                                                      | Signaling Molecules and Interaction - Metabolism of Cofactors and Vitamins - Nucleotide Metabolism                                                                                                              | 3    | 3 |
| K01916                                              | nadE                        | NAD <sup>+</sup> synthase [EC:6.3.1.5]                                                                                                            | Metabolism of Cofactors and Vitamins - Energy Metabolism                                                                                                                                                        | 80   | 5 |
| K03462                                              | E2.4.2.12, PBEF1            | nicotinamide phosphoribosyltransferase [EC:2.4.2.12]                                                                                              | Metabolism of Cofactors and Vitamins                                                                                                                                                                            | 2    | 2 |
| K03517                                              | nadA                        | quinolinate synthase [EC:2.5.1.72]                                                                                                                | Metabolism of Cofactors and Vitamins                                                                                                                                                                            | 3    | 3 |
| K03783                                              | punA                        | purine-nucleoside phosphorylase [EC:2.4.2.1]                                                                                                      | Metabolism of Cofactors and Vitamins - Nucleotide Metabolism                                                                                                                                                    | 1    | 1 |
| K03784                                              | deoD                        | purine-nucleoside phosphorylase [EC:2.4.2.1]                                                                                                      | Metabolism of Cofactors and Vitamins - Nucleotide Metabolism                                                                                                                                                    | 2    | 2 |
| K08281                                              | pncA                        | nicotinamide/pyrazinamide [EC:3.5.1.19 3.5.1.-]                                                                                                   | Metabolism of Cofactors and Vitamins                                                                                                                                                                            | 1    | 1 |
| K13522                                              | K13522, nadM                | bifunctional NMN adenylyltransferase/nudix hydrolase [EC:2.7.7.1 3.6.1.-]                                                                         | Metabolism of Cofactors and Vitamins                                                                                                                                                                            | 9    | 5 |
| ko00770_Pantothenate and CoA biosynthesis           |                             |                                                                                                                                                   |                                                                                                                                                                                                                 |      |   |
| K00053                                              | ilvC                        | ketol-acid reductoisomerase [EC:1.1.1.86]                                                                                                         | Metabolism of Cofactors and Vitamins - Amino Acid Metabolism                                                                                                                                                    | 2    | 2 |
| K00606                                              | parB                        | 3-methyl-2-oxobutanoate hydroxymethyltransferase [EC:2.1.2.11]                                                                                    | Metabolism of Cofactors and Vitamins                                                                                                                                                                            | 26   | 4 |
| K00826                                              | E2.6.1.42, ilvE             | branched-chain amino acid aminotransferase [EC:2.6.1.42]                                                                                          | Metabolism of Cofactors and Vitamins - Amino Acid Metabolism                                                                                                                                                    | 3    | 2 |
| K00954                                              | E2.7.7.3A, coaD, kdtB       | pantetheine-phosphate adenylyltransferase [EC:2.7.7.3]                                                                                            | Metabolism of Cofactors and Vitamins                                                                                                                                                                            | 9    | 2 |
| K01652                                              | E2.2.1.6L, ilvB, ilvG, ilvI | acetylacetyl synthase I/II/III large subunit [EC:2.2.1.6]                                                                                         | Carbohydrate Metabolism - Metabolism of Cofactors and Vitamins - Amino Acid Metabolism                                                                                                                          | 300  | 5 |
| K02201                                              | E2.7.7.3B                   | pantetheine-phosphate adenylyltransferase [EC:2.7.7.3]                                                                                            | Metabolism of Cofactors and Vitamins                                                                                                                                                                            | 4    | 2 |

|                                              |        |                       |                                                                                                                                                        |  |                                                                                                                                                                                                                 |     |   |  |
|----------------------------------------------|--------|-----------------------|--------------------------------------------------------------------------------------------------------------------------------------------------------|--|-----------------------------------------------------------------------------------------------------------------------------------------------------------------------------------------------------------------|-----|---|--|
| ko00780_Biotin metabolism                    |        |                       |                                                                                                                                                        |  |                                                                                                                                                                                                                 |     |   |  |
|                                              | K00652 | bioF                  | 8-amino-7-oxononanoate synthase [EC:2.3.1.47]                                                                                                          |  | Metabolism of Cofactors and Vitamins - Amino Acid Metabolism                                                                                                                                                    | 1   | 1 |  |
|                                              | K01423 | E3.4.-.-              |                                                                                                                                                        |  | Metabolism of Cofactors and Vitamins - Amino Acid Metabolism                                                                                                                                                    | 7   | 4 |  |
| ko00790_Folate biosynthesis                  |        |                       |                                                                                                                                                        |  |                                                                                                                                                                                                                 |     |   |  |
|                                              | K00287 | folA                  | dihydrofolate reductase [EC:1.5.1.3]                                                                                                                   |  | Metabolism of Cofactors and Vitamins                                                                                                                                                                            | 4   | 3 |  |
|                                              | K00796 | folP                  | dihydropteroate synthase [EC:2.5.1.15]                                                                                                                 |  | Metabolism of Cofactors and Vitamins                                                                                                                                                                            | 1   | 1 |  |
|                                              | K01495 | E3.5.4.16, folE       | GTP cyclohydrolase I [EC:3.5.4.16]                                                                                                                     |  | Metabolism of Cofactors and Vitamins                                                                                                                                                                            | 495 | 8 |  |
|                                              | K01737 | E4.2.3.12, ptpS       | 6-pyruvoyl tetrahydropterin synthase [EC:4.2.3.12]                                                                                                     |  | Metabolism of Cofactors and Vitamins                                                                                                                                                                            | 127 | 5 |  |
|                                              | K03342 | pabBC                 | para-aminobenzoate synthetase / 4-amino-4-deoxychorismate lyase [EC:2.6.1.85, 4.1.3.38]                                                                |  | Metabolism of Cofactors and Vitamins - Amino Acid Metabolism                                                                                                                                                    | 1   | 1 |  |
|                                              | K03639 | MOCs1, moaA           | molybdenum cofactor biosynthesis protein                                                                                                               |  | Folding, Sorting and Degradation - Metabolism of Cofactors and Vitamins                                                                                                                                         | 1   | 1 |  |
|                                              | K04071 | E1.1.1.220            | 6-pyruvoyltetrahydropterin 2'-reductase [EC:1.1.1.220]                                                                                                 |  | Metabolism of Cofactors and Vitamins                                                                                                                                                                            | 4   | 1 |  |
| ko00791_Atrazine degradation                 |        |                       |                                                                                                                                                        |  |                                                                                                                                                                                                                 |     |   |  |
|                                              | K01428 | ureC                  | urease subunit alpha [EC:3.5.1.5]                                                                                                                      |  | Infectious Diseases - Nucleotide Metabolism - Xenobiotics Biodegradation and Metabolism - Amino Acid Metabolism                                                                                                 | 2   | 1 |  |
|                                              | K01429 | ureB                  | urease subunit beta [EC:3.5.1.5]                                                                                                                       |  | Nucleotide Metabolism - Xenobiotics Biodegradation and Metabolism - Amino Acid Metabolism                                                                                                                       | 1   | 1 |  |
| ko00830_Retinol metabolism                   |        |                       |                                                                                                                                                        |  |                                                                                                                                                                                                                 |     |   |  |
|                                              | K00001 | E1.1.1.1, adh         | alcohol dehydrogenase [EC:1.1.1.1]                                                                                                                     |  | Carbohydrate Metabolism - Metabolism of Cofactors and Vitamins - Xenobiotics Biodegradation and Metabolism - Amino Acid Metabolism - Lipid Metabolism                                                           | 1   | 1 |  |
|                                              | K00121 | frmA, ADHS, adhC      | S-(hydroxymethyl)glutathione dehydrogenase / alcohol dehydrogenase [EC:1.1.1.284, 1.1.1.1]                                                             |  | Carbohydrate Metabolism - Metabolism of Cofactors and Vitamins - Xenobiotics Biodegradation and Metabolism - Amino Acid Metabolism - Lipid Metabolism - Energy Metabolism                                       | 8   | 3 |  |
|                                              | K13953 | adhP                  | alcohol dehydrogenase, propanol-preferring [EC:1.1.1.1]                                                                                                |  | Carbohydrate Metabolism - Metabolism of Cofactors and Vitamins - Xenobiotics Biodegradation and Metabolism - Amino Acid Metabolism - Lipid Metabolism                                                           | 1   | 1 |  |
| ko00860_Porphyrin and chlorophyll metabolism |        |                       |                                                                                                                                                        |  |                                                                                                                                                                                                                 |     |   |  |
|                                              | K00228 | hemF, CPOX            | coproporphyrinogen III oxidase [EC:1.3.3.3]                                                                                                            |  | Metabolism of Cofactors and Vitamins                                                                                                                                                                            | 4   | 2 |  |
|                                              | K00510 | HMOX, hmuO, ho        | heme oxygenase [EC:1.14.99.3]                                                                                                                          |  | Digestive System - Metabolism of Cofactors and Vitamins                                                                                                                                                         | 2   | 1 |  |
|                                              | K00643 | E2.3.1.37, ALAS       | 5-aminolevulinic acid synthase [EC:2.3.1.37]                                                                                                           |  | Metabolism of Cofactors and Vitamins - Amino Acid Metabolism                                                                                                                                                    | 7   | 4 |  |
|                                              | K00768 | E2.4.2.21, cobU, cobT | nicotinate-nucleotide-dimethylbenzimidazole phosphoribosyltransferase [EC:2.4.2.21]                                                                    |  | Metabolism of Cofactors and Vitamins                                                                                                                                                                            | 1   | 1 |  |
|                                              | K00798 | E2.5.1.17, cobO, btuR | cob(I)alamin adenosyltransferase [EC:2.5.1.17]                                                                                                         |  | Metabolism of Cofactors and Vitamins                                                                                                                                                                            | 2   | 1 |  |
|                                              | K01599 | hemE, UROD            | uroporphyrinogen decarboxylase [EC:4.1.1.37]                                                                                                           |  | Metabolism of Cofactors and Vitamins                                                                                                                                                                            | 2   | 1 |  |
|                                              | K01749 | hemC, HMBS            | hydroxymethylbilane synthase [EC:2.5.1.61]                                                                                                             |  | Metabolism of Cofactors and Vitamins                                                                                                                                                                            | 3   | 1 |  |
|                                              | K01772 | hemH, FECH            | ferrochelatase [EC:4.99.1.1]                                                                                                                           |  | Metabolism of Cofactors and Vitamins                                                                                                                                                                            | 1   | 1 |  |
|                                              | K01845 | hemL                  | glutamyl-1-semialdehyde 2,1-aminomutase [EC:5.4.3.8]                                                                                                   |  | Metabolism of Cofactors and Vitamins - Amino Acid Metabolism                                                                                                                                                    | 7   | 4 |  |
|                                              | K01885 | EARS, glX             | glutamyl-tRNA synthetase [EC:6.1.1.17]                                                                                                                 |  | Translation - Metabolism of Cofactors and Vitamins - Amino Acid Metabolism                                                                                                                                      | 1   | 1 |  |
|                                              | K02217 | ftnA, ftN             | ferritin [EC:1.16.3.1]                                                                                                                                 |  | Metabolism of Cofactors and Vitamins                                                                                                                                                                            | 36  | 2 |  |
|                                              | K02230 | cobN                  | cobaltochelatase CobN [EC:6.6.1.2]                                                                                                                     |  | Metabolism of Cofactors and Vitamins                                                                                                                                                                            | 1   | 1 |  |
|                                              | K02232 | E6.3.5.10, cobQ, cbpP | adenosylcobyrinic acid synthase [EC:6.3.5.10]                                                                                                          |  | Metabolism of Cofactors and Vitamins                                                                                                                                                                            | 1   | 1 |  |
|                                              | K02301 | cyoE                  | protoheme IX farnesyltransferase [EC:2.5.1.-]                                                                                                          |  | Metabolism of Cofactors and Vitamins - Metabolism of Terpenoids and Polyketides - Energy Metabolism                                                                                                             | 2   | 2 |  |
|                                              | K02495 | hemN, hemZ            | oxygen-independent coproporphyrinogen III oxidase [EC:1.3.99.22]                                                                                       |  | Metabolism of Cofactors and Vitamins                                                                                                                                                                            | 3   | 3 |  |
|                                              | K03404 | chID, bchD            | magnesium chelatase subunit D [EC:6.6.1.1]                                                                                                             |  | Metabolism of Cofactors and Vitamins                                                                                                                                                                            | 1   | 1 |  |
|                                              | K03795 | cbiX                  | sirohydrochlorin cobaltochelatase [EC:4.99.1.3]                                                                                                        |  | Metabolism of Cofactors and Vitamins                                                                                                                                                                            | 1   | 1 |  |
|                                              | K04034 | bchE                  | anaerobic magnesium-protoporphyrin IX monomethyl ester cyclase [EC:4.-.-.-]                                                                            |  | Metabolism of Cofactors and Vitamins                                                                                                                                                                            | 1   | 1 |  |
|                                              | K05371 | pcyA                  | phycocyanobilin:ferredoxin oxidoreductase [EC:1.3.7.5]                                                                                                 |  | Metabolism of Cofactors and Vitamins                                                                                                                                                                            | 4   | 2 |  |
|                                              | K09882 | cobS                  | cobaltochelatase CobS [EC:6.6.1.2]                                                                                                                     |  | Metabolism of Cofactors and Vitamins                                                                                                                                                                            | 39  | 2 |  |
| ko00900_Terpenoid backbone biosynthesis      |        |                       |                                                                                                                                                        |  |                                                                                                                                                                                                                 |     |   |  |
|                                              | K00054 | E1.1.1.88             | hydroxymethylglutaryl-CoA reductase [EC:1.1.1.88]                                                                                                      |  | Metabolism of Terpenoids and Polyketides                                                                                                                                                                        | 1   | 1 |  |
|                                              | K00099 | dxr                   | 1-deoxy-D-xylulose-5-phosphate reductoisomerase [EC:1.1.1.267]                                                                                         |  | Metabolism of Terpenoids and Polyketides                                                                                                                                                                        | 1   | 1 |  |
|                                              | K00626 | E2.3.1.9, atoB        | acetyl-CoA C-acetyltransferase [EC:2.3.1.9]                                                                                                            |  | Carbohydrate Metabolism - Signal Transduction - Xenobiotics Biodegradation and Metabolism - Metabolism of Terpenoids and Polyketides - Amino Acid Metabolism - Lipid Metabolism - Energy Metabolism             | 4   | 3 |  |
|                                              | K00795 | ispA                  | farnesyl diphosphate synthase [EC:2.5.1.1, 2.5.1.10]                                                                                                   |  | Metabolism of Terpenoids and Polyketides                                                                                                                                                                        | 1   | 1 |  |
|                                              | K00806 | uppS                  | undecaprenyl diphosphate synthase [EC:2.5.1.31]                                                                                                        |  | Metabolism of Terpenoids and Polyketides                                                                                                                                                                        | 6   | 1 |  |
|                                              | K00869 | E2.7.1.36, MVK, mvkK1 | mevalonate kinase [EC:2.7.1.36]                                                                                                                        |  | Transport and Catabolism - Metabolism of Terpenoids and Polyketides                                                                                                                                             | 1   | 1 |  |
|                                              | K00938 | E2.7.4.2, mvkK2       | phosphomevalonate kinase [EC:2.7.4.2]                                                                                                                  |  | Metabolism of Terpenoids and Polyketides                                                                                                                                                                        | 1   | 1 |  |
|                                              | K01662 | dxs                   | 1-deoxy-D-xylulose-5-phosphate synthase [EC:2.2.1.7]                                                                                                   |  | Metabolism of Terpenoids and Polyketides                                                                                                                                                                        | 2   | 2 |  |
|                                              | K01770 | ispF                  | 2-C-methyl-D-erythritol 2,4-cyclodiphosphate synthase [EC:4.6.6.1, 12]                                                                                 |  | Metabolism of Terpenoids and Polyketides                                                                                                                                                                        | 3   | 1 |  |
|                                              | K02523 | ispB                  | octaprenyl-diphosphate synthase [EC:2.5.1.90]                                                                                                          |  | Metabolism of Terpenoids and Polyketides                                                                                                                                                                        | 1   | 1 |  |
|                                              | K03526 | E1.17.7.1, gcpE, ispG | (E)-4-hydroxy-3-methylbut-2-enyl-diphosphate synthase [EC:1.17.7.1]                                                                                    |  | Metabolism of Terpenoids and Polyketides                                                                                                                                                                        | 4   | 3 |  |
|                                              | K03527 | E1.17.1.2, lytB, ispH | 4-hydroxy-3-methylbut-2-enyl diphosphate reductase [EC:1.17.1.2]                                                                                       |  | Metabolism of Terpenoids and Polyketides                                                                                                                                                                        | 2   | 2 |  |
| ko00903_Limonene and pinene degradation      |        |                       |                                                                                                                                                        |  |                                                                                                                                                                                                                 |     |   |  |
|                                              | K00128 | E1.2.1.3              | aldehyde dehydrogenase (NAD+) [EC:1.2.1.3]                                                                                                             |  | Carbohydrate Metabolism - Metabolism of Other Amino Acids - Xenobiotics Biodegradation and Metabolism - Metabolism of Terpenoids and Polyketides - Amino Acid Metabolism - Lipid Metabolism                     | 4   | 4 |  |
|                                              | K00680 | E2.3.1.-              |                                                                                                                                                        |  | Xenobiotics Biodegradation and Metabolism - Metabolism of Terpenoids and Polyketides - Amino Acid Metabolism                                                                                                    | 9   | 1 |  |
|                                              | K01076 | E3.1.2.-              |                                                                                                                                                        |  | Metabolism of Terpenoids and Polyketides - Lipid Metabolism                                                                                                                                                     | 1   | 1 |  |
|                                              | K01692 | E4.2.1.17, paaG       | enoyl-CoA hydratase [EC:4.2.1.17]                                                                                                                      |  | Carbohydrate Metabolism - Metabolism of Other Amino Acids - Xenobiotics Biodegradation and Metabolism - Metabolism of Terpenoids and Polyketides - Amino Acid Metabolism - Lipid Metabolism                     | 33  | 3 |  |
|                                              | K01726 | E4.2.1.-              |                                                                                                                                                        |  | Carbohydrate Metabolism - Xenobiotics Biodegradation and Metabolism - Metabolism of Terpenoids and Polyketides                                                                                                  | 1   | 1 |  |
|                                              | K01825 | fadB                  | 3-hydroxyacyl-CoA dehydrogenase / enoyl-CoA hydratase / 3-hydroxybutyryl-CoA epimerase / enoyl-CoA isomerase [EC:1.1.1.35, 4.2.1.17, 5.1.2.3, 5.3.3.8] |  | Carbohydrate Metabolism - Metabolism of Other Amino Acids - Xenobiotics Biodegradation and Metabolism - Metabolism of Terpenoids and Polyketides - Amino Acid Metabolism - Lipid Metabolism - Energy Metabolism | 1   | 1 |  |
| ko00906_Carotenoid biosynthesis              |        |                       |                                                                                                                                                        |  |                                                                                                                                                                                                                 |     |   |  |
|                                              | K02291 | crtB                  | phytoene synthase [EC:2.5.1.32]                                                                                                                        |  | Metabolism of Terpenoids and Polyketides                                                                                                                                                                        | 1   | 1 |  |
|                                              | K10027 | crtI                  | phytoene dehydrogenase [EC:1.14.99.-]                                                                                                                  |  | Metabolism of Terpenoids and Polyketides                                                                                                                                                                        | 4   | 2 |  |
| ko00910_Nitrogen metabolism                  |        |                       |                                                                                                                                                        |  |                                                                                                                                                                                                                 |     |   |  |
|                                              | K00261 | E1.4.1.3              | glutamate dehydrogenase (NAD(P)+) [EC:1.4.1.3]                                                                                                         |  | Metabolism of Other Amino Acids - Excretory System - Amino Acid Metabolism - Energy Metabolism                                                                                                                  | 3   | 2 |  |
|                                              | K00265 | glbB                  | glutamate synthase (NADPH/NADH) large chain [EC:1.4.1.13, 1.4.1.14]                                                                                    |  | Amino Acid Metabolism - Energy Metabolism                                                                                                                                                                       | 3   | 3 |  |
|                                              | K00266 | glbD                  | glutamate synthase (NADPH/NADH) small chain [EC:1.4.1.13, 1.4.1.14]                                                                                    |  | Amino Acid Metabolism - Energy Metabolism                                                                                                                                                                       | 1   | 1 |  |
|                                              | K00285 | dadA                  | D-amino-acid dehydrogenase [EC:1.4.99.1]                                                                                                               |  | Amino Acid Metabolism - Energy Metabolism                                                                                                                                                                       | 19  | 4 |  |
|                                              | K00362 | E1.7.1.4L, nirB       | nitrite reductase (NAD(P)H) large subunit [EC:1.7.1.4]                                                                                                 |  | Energy Metabolism                                                                                                                                                                                               | 1   | 1 |  |
|                                              | K00368 | E1.7.2.1              | nitrite reductase (NO-forming) [EC:1.7.2.1]                                                                                                            |  | Energy Metabolism                                                                                                                                                                                               | 1   | 1 |  |
|                                              | K00370 | narG                  | nitrate reductase 1, alpha subunit [EC:1.7.99.4]                                                                                                       |  | Signal Transduction - Energy Metabolism                                                                                                                                                                         | 1   | 1 |  |
|                                              | K00372 | E1.7.99.4C            | nitrate reductase catalytic subunit [EC:1.7.99.4]                                                                                                      |  | Energy Metabolism                                                                                                                                                                                               | 1   | 1 |  |
|                                              | K00459 | E1.13.12.16           | nitronate monooxygenase [EC:1.13.12.16]                                                                                                                |  | Energy Metabolism                                                                                                                                                                                               | 1   | 1 |  |
|                                              | K00605 | E2.1.2.10, gcvT       | aminomethyltransferase [EC:2.1.2.10]                                                                                                                   |  | Metabolism of Cofactors and Vitamins - Amino Acid Metabolism - Energy Metabolism                                                                                                                                | 2   | 2 |  |
|                                              | K01424 | E3.5.1.1, ansA, ansB  | L-asparaginase [EC:3.5.1.1]                                                                                                                            |  | Metabolism of Other Amino Acids - Amino Acid Metabolism - Energy Metabolism                                                                                                                                     | 1   | 1 |  |
|                                              | K01501 | E3.5.5.1              | nitriase [EC:3.5.5.1]                                                                                                                                  |  | Metabolism of Other Amino Acids - Xenobiotics Biodegradation and Metabolism - Amino Acid Metabolism - Energy Metabolism                                                                                         | 1   | 1 |  |
|                                              | K01667 | E4.1.99.1, tnaA       | tryptophanase [EC:4.1.99.1]                                                                                                                            |  | Amino Acid Metabolism - Energy Metabolism                                                                                                                                                                       | 1   | 1 |  |
|                                              | K01673 | cynT, can             | carbonic anhydrase [EC:4.2.1.1]                                                                                                                        |  | Energy Metabolism                                                                                                                                                                                               | 2   | 2 |  |
|                                              | K01760 | metC                  | cystathionine beta-lyase [EC:4.4.1.8]                                                                                                                  |  | Metabolism of Other Amino Acids - Amino Acid Metabolism - Energy Metabolism                                                                                                                                     | 1   | 1 |  |
|                                              | K01915 | E6.3.1.2, glnA        | glutamine synthetase [EC:6.3.1.2]                                                                                                                      |  | Signal Transduction - Nervous System - Amino Acid Metabolism - Energy Metabolism                                                                                                                                | 123 | 7 |  |
|                                              | K01916 | nadE                  | NAD+ synthase [EC:6.3.1.5]                                                                                                                             |  | Metabolism of Cofactors and Vitamins - Energy Metabolism                                                                                                                                                        | 80  | 5 |  |
|                                              | K01953 | E6.3.5.4, asnB        | asparagine synthase (glutamine-hydrolysing) [EC:6.3.5.4]                                                                                               |  | Enzyme Families - Amino Acid Metabolism - Energy Metabolism                                                                                                                                                     | 14  | 2 |  |
|                                              | K02592 | nifN                  | nitrogenase molybdenum-iron protein NifN                                                                                                               |  | Energy Metabolism                                                                                                                                                                                               | 1   | 1 |  |
|                                              | K04748 | norQ                  | nitric-oxide reductase NorQ protein [EC:1.7.99.7]                                                                                                      |  | Energy Metabolism                                                                                                                                                                                               | 15  | 2 |  |

|                                                                 |                       |                                                                                                                                                     |                                                                                                                                                                                                                 |     |   |  |
|-----------------------------------------------------------------|-----------------------|-----------------------------------------------------------------------------------------------------------------------------------------------------|-----------------------------------------------------------------------------------------------------------------------------------------------------------------------------------------------------------------|-----|---|--|
| ko00920_Sulfur metabolism                                       |                       |                                                                                                                                                     |                                                                                                                                                                                                                 |     |   |  |
| K00640                                                          | E2.3.1.30, cysE       | serine O-acetyltransferase [EC:2.3.1.30]                                                                                                            | Amino Acid Metabolism - Energy Metabolism                                                                                                                                                                       | 2   | 2 |  |
| K00641                                                          | E2.3.1.31, metX       | homoserine O-acetyltransferase [EC:2.3.1.31]                                                                                                        | Amino Acid Metabolism - Energy Metabolism                                                                                                                                                                       | 1   | 1 |  |
| K00860                                                          | cysC                  | adenylsulfate kinase [EC:2.7.1.25]                                                                                                                  | Nucleotide Metabolism - Energy Metabolism                                                                                                                                                                       | 165 | 4 |  |
| K00955                                                          | cysNC                 | bifunctional enzyme CysN/CysC [EC:2.7.4.2.7.1.25]                                                                                                   | Metabolism of Other Amino Acids - Nucleotide Metabolism - Energy Metabolism                                                                                                                                     | 2   | 2 |  |
| K00957                                                          | cysD                  | sulfate adenylyltransferase subunit 2 [EC:2.7.7.4]                                                                                                  | Metabolism of Other Amino Acids - Nucleotide Metabolism - Energy Metabolism                                                                                                                                     | 2   | 2 |  |
| K01738                                                          | cysK                  | cysteine synthase A [EC:2.5.1.47]                                                                                                                   | Amino Acid Metabolism - Energy Metabolism                                                                                                                                                                       | 30  | 5 |  |
| K01760                                                          | metC                  | cystathionine beta-lyase [EC:4.4.1.8]                                                                                                               | Metabolism of Other Amino Acids - Amino Acid Metabolism - Energy Metabolism                                                                                                                                     | 2   | 1 |  |
| K12339                                                          | cysM                  | cysteine synthase B [EC:2.5.1.47]                                                                                                                   | Amino Acid Metabolism - Energy Metabolism                                                                                                                                                                       | 5   | 2 |  |
| ko00930_Caprolactam degradation                                 |                       |                                                                                                                                                     |                                                                                                                                                                                                                 |     |   |  |
| K01692                                                          | E4.2.1.17, paaG       | enoyl-CoA hydratase [EC:4.2.1.17]                                                                                                                   | Carbohydrate Metabolism - Metabolism of Other Amino Acids - Xenobiotics Biodegradation and Metabolism - Metabolism of Terpenoids and Polyketides - Amino Acid Metabolism - Lipid Metabolism                     | 33  | 3 |  |
| K01825                                                          | fadB                  | 3-hydroxyacyl-CoA dehydrogenase / enoyl-CoA hydratase / 3-hydroxybutyryl-CoA epimerase / enoyl-CoA isomerase [EC:1.1.1.35 4.2.1.17 5.1.2.3 5.3.3.8] | Carbohydrate Metabolism - Metabolism of Other Amino Acids - Xenobiotics Biodegradation and Metabolism - Metabolism of Terpenoids and Polyketides - Amino Acid Metabolism - Lipid Metabolism - Energy Metabolism | 1   | 1 |  |
| ko00940_Phenylpropanoid biosynthesis                            |                       |                                                                                                                                                     |                                                                                                                                                                                                                 |     |   |  |
| K00588                                                          | E2.1.1.104            | caffeoyl-CoA O-methyltransferase [EC:2.1.1.104]                                                                                                     | Biosynthesis of Other Secondary Metabolites - Amino Acid Metabolism                                                                                                                                             | 1   | 1 |  |
| K03782                                                          | katG                  | catalase/oxidase [EC:1.11.1.6 1.11.1.7]                                                                                                             | Biosynthesis of Other Secondary Metabolites - Amino Acid Metabolism - Energy Metabolism                                                                                                                         | 9   | 1 |  |
| K05349                                                          | bgIX                  | beta-glucosidase [EC:3.2.1.21]                                                                                                                      | Carbohydrate Metabolism - Metabolism of Other Amino Acids - Biosynthesis of Other Secondary Metabolites                                                                                                         | 1   | 1 |  |
| K05350                                                          | bgIB                  | beta-glucosidase [EC:3.2.1.21]                                                                                                                      | Carbohydrate Metabolism - Metabolism of Other Amino Acids - Biosynthesis of Other Secondary Metabolites                                                                                                         | 4   | 2 |  |
| ko00941_Flavonoid biosynthesis                                  |                       |                                                                                                                                                     |                                                                                                                                                                                                                 |     |   |  |
| K00091                                                          | E1.1.1.219            | dihydroflavonol-4-reductase [EC:1.1.1.219]                                                                                                          | Biosynthesis of Other Secondary Metabolites                                                                                                                                                                     | 1   | 1 |  |
| K00588                                                          | E2.1.1.104            | caffeoyl-CoA O-methyltransferase [EC:2.1.1.104]                                                                                                     | Biosynthesis of Other Secondary Metabolites - Amino Acid Metabolism                                                                                                                                             | 1   | 1 |  |
| ko00945_Stilbenoid, diarylheptanoid and gingerol biosynthesis   |                       |                                                                                                                                                     |                                                                                                                                                                                                                 |     |   |  |
| K00588                                                          | E2.1.1.104            | caffeoyl-CoA O-methyltransferase [EC:2.1.1.104]                                                                                                     | Biosynthesis of Other Secondary Metabolites - Amino Acid Metabolism                                                                                                                                             | 1   | 1 |  |
| ko00950_Isoquinoline alkaloid biosynthesis                      |                       |                                                                                                                                                     |                                                                                                                                                                                                                 |     |   |  |
| K00812                                                          | E2.6.1.1A, aspB       | aspartate aminotransferase [EC:2.6.1.1]                                                                                                             | Biosynthesis of Other Secondary Metabolites - Amino Acid Metabolism - Energy Metabolism                                                                                                                         | 46  | 3 |  |
| ko00960_Tropane, piperidine and pyridine alkaloid biosynthesis  |                       |                                                                                                                                                     |                                                                                                                                                                                                                 |     |   |  |
| K00808                                                          | hss                   | homoserine synthase [EC:2.5.1.44]                                                                                                                   | Biosynthesis of Other Secondary Metabolites                                                                                                                                                                     | 1   | 1 |  |
| K00812                                                          | E2.6.1.1A, aspB       | aspartate aminotransferase [EC:2.6.1.1]                                                                                                             | Biosynthesis of Other Secondary Metabolites - Amino Acid Metabolism - Energy Metabolism                                                                                                                         | 46  | 3 |  |
| K00817                                                          | hisC                  | histidinol-phosphate aminotransferase [EC:2.6.1.9]                                                                                                  | Biosynthesis of Other Secondary Metabolites - Amino Acid Metabolism                                                                                                                                             | 6   | 3 |  |
| ko00970_Aminoacyl-tRNA biosynthesis                             |                       |                                                                                                                                                     |                                                                                                                                                                                                                 |     |   |  |
| K00604                                                          | MTFMT, fmt            | methionyl-tRNA formyltransferase [EC:2.1.2.9]                                                                                                       | Translation - Metabolism of Cofactors and Vitamins                                                                                                                                                              | 50  | 5 |  |
| K01866                                                          | YARS, tyrS            | tyrosyl-tRNA synthetase [EC:6.1.1.1]                                                                                                                | Translation - Amino Acid Metabolism                                                                                                                                                                             | 1   | 1 |  |
| K01867                                                          | WARS, trpS            | tryptophanyl-tRNA synthetase [EC:6.1.1.2]                                                                                                           | Translation - Amino Acid Metabolism                                                                                                                                                                             | 3   | 1 |  |
| K01869                                                          | LARS, leuS            | leucyl-tRNA synthetase [EC:6.1.1.4]                                                                                                                 | Translation - Amino Acid Metabolism                                                                                                                                                                             | 2   | 2 |  |
| K01870                                                          | IARS, ileS            | isoleucyl-tRNA synthetase [EC:6.1.1.5]                                                                                                              | Translation - Amino Acid Metabolism                                                                                                                                                                             | 3   | 2 |  |
| K01872                                                          | AARS, alaS            | alanyl-tRNA synthetase [EC:6.1.1.7]                                                                                                                 | Translation - Amino Acid Metabolism                                                                                                                                                                             | 7   | 4 |  |
| K01873                                                          | VARS, valS            | valyl-tRNA synthetase [EC:6.1.1.9]                                                                                                                  | Translation - Amino Acid Metabolism                                                                                                                                                                             | 3   | 2 |  |
| K01874                                                          | MARS, metG            | methionyl-tRNA synthetase [EC:6.1.1.10]                                                                                                             | Translation - Metabolism of Other Amino Acids - Amino Acid Metabolism                                                                                                                                           | 6   | 3 |  |
| K01875                                                          | SARS, serS            | seryl-tRNA synthetase [EC:6.1.1.11]                                                                                                                 | Translation - Amino Acid Metabolism                                                                                                                                                                             | 3   | 2 |  |
| K01876                                                          | DARS, aspS            | aspartyl-tRNA synthetase [EC:6.1.1.12]                                                                                                              | Translation - Amino Acid Metabolism                                                                                                                                                                             | 1   | 1 |  |
| K01881                                                          | PARS, proS            | prolyl-tRNA synthetase [EC:6.1.1.15]                                                                                                                | Translation - Amino Acid Metabolism                                                                                                                                                                             | 2   | 1 |  |
| K01883                                                          | CARS, cysS            | cysteinyl-tRNA synthetase [EC:6.1.1.16]                                                                                                             | Translation - Amino Acid Metabolism                                                                                                                                                                             | 2   | 2 |  |
| K01885                                                          | EARS, glx             | glutamyl-tRNA synthetase [EC:6.1.1.17]                                                                                                              | Translation - Metabolism of Cofactors and Vitamins - Amino Acid Metabolism                                                                                                                                      | 1   | 1 |  |
| K01886                                                          | QARS, glnS            | glutaminyl-tRNA synthetase [EC:6.1.1.18]                                                                                                            | Translation - Amino Acid Metabolism                                                                                                                                                                             | 3   | 1 |  |
| K01887                                                          | RARS, argS            | arginyl-tRNA synthetase [EC:6.1.1.19]                                                                                                               | Translation - Amino Acid Metabolism                                                                                                                                                                             | 2   | 1 |  |
| K01890                                                          | FARBS, pheT           | phenylalanyl-tRNA synthetase beta chain [EC:6.1.1.20]                                                                                               | Translation - Amino Acid Metabolism                                                                                                                                                                             | 2   | 1 |  |
| K01892                                                          | HARS, hisS            | histidyl-tRNA synthetase [EC:6.1.1.21]                                                                                                              | Translation - Amino Acid Metabolism                                                                                                                                                                             | 1   | 1 |  |
| K01893                                                          | NARS, asnS            | asparagyl-tRNA synthetase [EC:6.1.1.22]                                                                                                             | Translation - Amino Acid Metabolism                                                                                                                                                                             | 1   | 1 |  |
| K02433                                                          | gatA                  | aspartyl-tRNA(Asn)/glutamyl-tRNA(Gln) amidotransferase subunit A [EC:6.3.5.6 6.3.5.7]                                                               | Translation                                                                                                                                                                                                     | 1   | 1 |  |
| K04567                                                          | KARS, lysS            | lysyl-tRNA synthetase, class II [EC:6.1.1.6]                                                                                                        | Translation - Amino Acid Metabolism                                                                                                                                                                             | 18  | 2 |  |
| K09482                                                          | gatD                  | glutamyl-tRNA(Gln) amidotransferase subunit D [EC:6.3.5.7]                                                                                          | Translation                                                                                                                                                                                                     | 1   | 1 |  |
| ko00980_Metabolism of xenobiotics by cytochrome P450            |                       |                                                                                                                                                     |                                                                                                                                                                                                                 |     |   |  |
| K00001                                                          | E1.1.1.1, adh         | alcohol dehydrogenase [EC:1.1.1.1]                                                                                                                  | Carbohydrate Metabolism - Metabolism of Cofactors and Vitamins - Xenobiotics Biodegradation and Metabolism - Amino Acid Metabolism - Lipid Metabolism                                                           | 1   | 1 |  |
| K00121                                                          | frmA, ADH5, adhC      | S-(hydroxymethyl)glutathione dehydrogenase / alcohol dehydrogenase [EC:1.1.1.284 1.1.1.1]                                                           | Carbohydrate Metabolism - Metabolism of Cofactors and Vitamins - Xenobiotics Biodegradation and Metabolism - Amino Acid Metabolism - Lipid Metabolism - Energy Metabolism                                       | 8   | 3 |  |
| K13953                                                          | adhP                  | alcohol dehydrogenase, propanol-preferring [EC:1.1.1.1]                                                                                             | Carbohydrate Metabolism - Metabolism of Cofactors and Vitamins - Xenobiotics Biodegradation and Metabolism - Amino Acid Metabolism - Lipid Metabolism                                                           | 1   | 1 |  |
| ko00982_Drug metabolism - cytochrome P450                       |                       |                                                                                                                                                     |                                                                                                                                                                                                                 |     |   |  |
| K00001                                                          | E1.1.1.1, adh         | alcohol dehydrogenase [EC:1.1.1.1]                                                                                                                  | Carbohydrate Metabolism - Metabolism of Cofactors and Vitamins - Xenobiotics Biodegradation and Metabolism - Amino Acid Metabolism - Lipid Metabolism                                                           | 1   | 1 |  |
| K00121                                                          | frmA, ADH5, adhC      | S-(hydroxymethyl)glutathione dehydrogenase / alcohol dehydrogenase [EC:1.1.1.284 1.1.1.1]                                                           | Carbohydrate Metabolism - Metabolism of Cofactors and Vitamins - Xenobiotics Biodegradation and Metabolism - Amino Acid Metabolism - Lipid Metabolism - Energy Metabolism                                       | 8   | 3 |  |
| K13953                                                          | adhP                  | alcohol dehydrogenase, propanol-preferring [EC:1.1.1.1]                                                                                             | Carbohydrate Metabolism - Metabolism of Cofactors and Vitamins - Xenobiotics Biodegradation and Metabolism - Amino Acid Metabolism - Lipid Metabolism                                                           | 1   | 1 |  |
| ko00983_Drug metabolism - other enzymes                         |                       |                                                                                                                                                     |                                                                                                                                                                                                                 |     |   |  |
| K00088                                                          | E1.1.1.205, guaB      | IMP dehydrogenase [EC:1.1.1.205]                                                                                                                    | Nucleotide Metabolism - Xenobiotics Biodegradation and Metabolism                                                                                                                                               | 57  | 4 |  |
| K00760                                                          | E2.4.2.8, hpt         | hypoxanthine phosphoribosyltransferase [EC:2.4.2.8]                                                                                                 | Nucleotide Metabolism - Xenobiotics Biodegradation and Metabolism                                                                                                                                               | 62  | 4 |  |
| K00857                                                          | E2.7.1.21, tdk        | thymidine kinase [EC:2.7.1.21]                                                                                                                      | Nucleotide Metabolism - Xenobiotics Biodegradation and Metabolism                                                                                                                                               | 13  | 3 |  |
| K01951                                                          | E6.3.5.2, guaA        | GMP synthase (glutamine-hydrolysing) [EC:6.3.5.2]                                                                                                   | Enzyme Families - Nucleotide Metabolism - Xenobiotics Biodegradation and Metabolism                                                                                                                             | 1   | 1 |  |
| K13421                                                          | UMPS                  | uridine monophosphate synthetase [EC:2.4.2.10 4.1.1.23]                                                                                             | Nucleotide Metabolism - Xenobiotics Biodegradation and Metabolism                                                                                                                                               | 1   | 1 |  |
| ko01040_Biosynthesis of unsaturated fatty acids                 |                       |                                                                                                                                                     |                                                                                                                                                                                                                 |     |   |  |
| K00059                                                          | fabG                  | 3-oxoacyl-[acyl-carrier protein] reductase [EC:1.1.1.100]                                                                                           | Lipid Metabolism                                                                                                                                                                                                | 10  | 4 |  |
| K00507                                                          | SCD, desC             | stearoyl-CoA desaturase (delta-9 desaturase) [EC:1.14.19.1]                                                                                         | Endocrine System - Lipid Metabolism                                                                                                                                                                             | 13  | 2 |  |
| K01076                                                          | E3.1.2.-              |                                                                                                                                                     | Metabolism of Terpenoids and Polyketides - Lipid Metabolism                                                                                                                                                     | 1   | 1 |  |
| K01825                                                          | fadB                  | 3-hydroxyacyl-CoA dehydrogenase / enoyl-CoA hydratase / 3-hydroxybutyryl-CoA epimerase / enoyl-CoA isomerase [EC:1.1.1.35 4.2.1.17 5.1.2.3 5.3.3.8] | Carbohydrate Metabolism - Metabolism of Other Amino Acids - Xenobiotics Biodegradation and Metabolism - Metabolism of Terpenoids and Polyketides - Amino Acid Metabolism - Lipid Metabolism - Energy Metabolism | 1   | 1 |  |
| K10806                                                          | yclA                  | acyl-CoA thioesterase YclA [EC:3.1.2.-]                                                                                                             | Lipid Metabolism                                                                                                                                                                                                | 6   | 2 |  |
| ko01051_Biosynthesis of ansamycins                              |                       |                                                                                                                                                     |                                                                                                                                                                                                                 |     |   |  |
| K00615                                                          | E2.2.1.1, ktaA, ktaB  | transketolase [EC:2.2.1.1]                                                                                                                          | Carbohydrate Metabolism - Metabolism of Terpenoids and Polyketides - Energy Metabolism                                                                                                                          | 59  | 3 |  |
| ko01053_Biosynthesis of siderophore group nonribosomal peptides |                       |                                                                                                                                                     |                                                                                                                                                                                                                 |     |   |  |
| K04789                                                          | mbiE                  | mycobactin peptide synthetase MbiE                                                                                                                  | Metabolism of Terpenoids and Polyketides                                                                                                                                                                        | 2   | 1 |  |
| K12240                                                          | pchF                  | pyochelin synthetase                                                                                                                                | Metabolism of Terpenoids and Polyketides                                                                                                                                                                        | 4   | 1 |  |
| ko01055_Biosynthesis of vancomycin group antibiotics            |                       |                                                                                                                                                     |                                                                                                                                                                                                                 |     |   |  |
| K01710                                                          | E4.2.1.46, rfbB, rfbG | dTDP-glucose 4,6-dehydratase [EC:4.2.1.46]                                                                                                          | Biosynthesis of Other Secondary Metabolites - Metabolism of Terpenoids and Polyketides                                                                                                                          | 341 | 7 |  |
| ko02010_ABC transporters                                        |                       |                                                                                                                                                     |                                                                                                                                                                                                                 |     |   |  |

|                              |                       |                                                                                                 |                                                                                                                                                                                                     |     |   |
|------------------------------|-----------------------|-------------------------------------------------------------------------------------------------|-----------------------------------------------------------------------------------------------------------------------------------------------------------------------------------------------------|-----|---|
| K01995                       | livG                  | branched-chain amino acid transport system ATP-binding protein                                  | Membrane Transport                                                                                                                                                                                  | 1   | 1 |
| K01996                       | livF                  | branched-chain amino acid transport system ATP-binding protein                                  | Membrane Transport                                                                                                                                                                                  | 3   | 2 |
| K01997                       | livH                  | branched-chain amino acid transport system permease protein                                     | Membrane Transport                                                                                                                                                                                  | 1   | 1 |
| K01998                       | livM                  | branched-chain amino acid transport system permease protein                                     | Membrane Transport                                                                                                                                                                                  | 5   | 3 |
| K01999                       | livK                  | branched-chain amino acid transport system substrate-binding protein                            | Membrane Transport                                                                                                                                                                                  | 2   | 2 |
| K02001                       | proW                  | glycine betaine/proline transport system permease protein                                       | Membrane Transport                                                                                                                                                                                  | 9   | 3 |
| K02010                       | afuC, fbpC            | iron(III) transport system ATP-binding protein [EC:3.6.3.30]                                    | Membrane Transport                                                                                                                                                                                  | 1   | 1 |
| K02011                       | afuB, fbpB            | iron(III) transport system permease protein                                                     | Membrane Transport                                                                                                                                                                                  | 2   | 1 |
| K02013                       | ABC.FEV.A             | iron complex transport system ATP-binding protein [EC:3.6.3.34]                                 | Membrane Transport                                                                                                                                                                                  | 1   | 1 |
| K02032                       | ABC.PE.A1             | peptide/nickel transport system ATP-binding protein                                             | Membrane Transport                                                                                                                                                                                  | 3   | 2 |
| K02033                       | ABC.PE.P              | peptide/nickel transport system permease protein                                                | Membrane Transport                                                                                                                                                                                  | 2   | 2 |
| K02034                       | ABC.PE.P1             | peptide/nickel transport system permease protein                                                | Membrane Transport                                                                                                                                                                                  | 3   | 3 |
| K02035                       | ABC.PE.S              | peptide/nickel transport system substrate-binding protein                                       | Membrane Transport                                                                                                                                                                                  | 8   | 4 |
| K02040                       | psfS                  | phosphate transport system substrate-binding protein                                            | Signal Transduction - Infectious Diseases - Membrane Transport                                                                                                                                      | 57  | 4 |
| K02042                       | phrE                  | phosphonate transport system permease protein                                                   | Membrane Transport                                                                                                                                                                                  | 1   | 1 |
| K02046                       | cysU                  | sulfate transport system permease protein                                                       | Membrane Transport                                                                                                                                                                                  | 1   | 1 |
| K02049                       | ABC.SN.A, ssuB, tauB  | sulfonate/nitrate/taurine transport system ATP-binding protein                                  | Membrane Transport                                                                                                                                                                                  | 4   | 3 |
| K02050                       | ABC.SN.P, ssuC, tauC  | sulfonate/nitrate/taurine transport system permease protein                                     | Membrane Transport                                                                                                                                                                                  | 3   | 2 |
| K02072                       | ABC.MET.P, metI       | D-methionine transport system permease protein                                                  | Membrane Transport                                                                                                                                                                                  | 1   | 1 |
| K02073                       | ABC.MET.S, metQ       | D-methionine transport system substrate-binding protein                                         | Membrane Transport                                                                                                                                                                                  | 1   | 1 |
| K02194                       | cmoB                  | heme exporter protein B                                                                         | Membrane Transport                                                                                                                                                                                  | 1   | 1 |
| K02195                       | cmoC                  | heme exporter protein C                                                                         | Membrane Transport                                                                                                                                                                                  | 1   | 1 |
| K05685                       | macB                  | macrolide transport system ATP-binding/permease protein [EC:3.6.3.-]                            | Membrane Transport                                                                                                                                                                                  | 1   | 1 |
| K05814                       | ugdA                  | sn-glycerol 3-phosphate transport system permease protein                                       | Membrane Transport                                                                                                                                                                                  | 1   | 1 |
| K06857                       | ABC.TG.A              | putative tungstate transport system ATP-binding protein                                         | Membrane Transport                                                                                                                                                                                  | 1   | 1 |
| K06861                       | lplB                  | lipopolysaccharide export system ATP-binding protein [EC:3.6.3.-]                               | Membrane Transport                                                                                                                                                                                  | 1   | 1 |
| K09686                       | ABC-2.AB.P            | antibiotic transport system permease protein                                                    | Membrane Transport                                                                                                                                                                                  | 4   | 1 |
| K09687                       | ABC-2.AB.A            | antibiotic transport system ATP-binding protein                                                 | Membrane Transport                                                                                                                                                                                  | 1   | 1 |
| K09691                       | ABC-2.LPSE.A          | lipopolysaccharide transport system ATP-binding protein                                         | Membrane Transport                                                                                                                                                                                  | 4   | 2 |
| K09695                       | nodI                  | lipooligosaccharide transport system ATP-binding protein                                        | Membrane Transport                                                                                                                                                                                  | 1   | 1 |
| K09808                       | ABC.LPT.P, lolC, lolE | lipoprotein-releasing system permease protein                                                   | Membrane Transport                                                                                                                                                                                  | 1   | 1 |
| K10005                       | gluB                  | glutamate transport system substrate-binding protein                                            | Membrane Transport                                                                                                                                                                                  | 1   | 1 |
| K10107                       | ABC-2.CPSE.P1         | capsular polysaccharide transport system permease protein                                       | Membrane Transport                                                                                                                                                                                  | 1   | 1 |
| K10112                       | msmX, msmK            | maltose/maltodextrin transport system ATP-binding protein                                       | Membrane Transport                                                                                                                                                                                  | 1   | 1 |
| K11952                       | cmpC                  | bicarbonate transport system ATP-binding protein [EC:3.6.3.-]                                   | Membrane Transport                                                                                                                                                                                  | 2   | 1 |
| K11962                       | urfD                  | urea transport system ATP-binding protein                                                       | Membrane Transport                                                                                                                                                                                  | 1   | 1 |
| ko02020_Two-component system |                       |                                                                                                 |                                                                                                                                                                                                     |     |   |
| K00027                       | E1.1.1.38, sfcA, maeA | malate dehydrogenase (oxaloacetate-decarboxylating) [EC:1.1.1.38]                               | Carbohydrate Metabolism - Signal Transduction                                                                                                                                                       | 2   | 1 |
| K00066                       | algD                  | GDP-mannose 6-dehydrogenase [EC:1.1.1.132]                                                      | Carbohydrate Metabolism - Signal Transduction                                                                                                                                                       | 3   | 1 |
| K00370                       | narG                  | nitrate reductase 1, alpha subunit [EC:1.7.99.4]                                                | Signal Transduction - Energy Metabolism                                                                                                                                                             | 1   | 1 |
| K00575                       | cheR                  | chemotaxis protein methyltransferase CheR [EC:2.1.1.80]                                         | Cell Motility - Signal Transduction                                                                                                                                                                 | 1   | 1 |
| K00626                       | E2.3.1.9, atoB        | acetyl-CoA C-acetyltransferase [EC:2.3.1.9]                                                     | Carbohydrate Metabolism - Signal Transduction - Xenobiotics Biodegradation and Metabolism - Metabolism of Terpenoids and Polyketides - Amino Acid Metabolism - Lipid Metabolism - Energy Metabolism | 4   | 3 |
| K00990                       | glnD                  | [protein-Pil] uridylyltransferase [EC:2.7.7.59]                                                 | Signal Transduction                                                                                                                                                                                 | 1   | 1 |
| K01467                       | E3.5.2.6, ampC, penP  | beta-lactamase [EC:3.5.2.6]                                                                     | Signal Transduction - Biosynthesis of Other Secondary Metabolites                                                                                                                                   | 1   | 1 |
| K01546                       | kdpA                  | K+-transporting ATPase ATPase A chain [EC:3.6.3.12]                                             | Signal Transduction                                                                                                                                                                                 | 1   | 1 |
| K01915                       | E6.3.1.2, glnA        | glutamine synthetase [EC:6.3.1.2]                                                               | Signal Transduction - Nervous System - Amino Acid Metabolism - Energy Metabolism                                                                                                                    | 113 | 7 |
| K02040                       | petS                  | phosphate transport system substrate-binding protein                                            | Signal Transduction - Infectious Diseases - Membrane Transport                                                                                                                                      | 57  | 4 |
| K02313                       | dnaA                  | chromosomal replication initiator protein                                                       | Signal Transduction - Cell Growth and Death - Replication and Repair                                                                                                                                | 470 | 2 |
| K02405                       | flaA                  | RNA polymerase sigma factor for flagellar operon FlIA                                           | Cell Motility - Transcription - Signal Transduction - Infectious Diseases                                                                                                                           | 7   | 2 |
| K02489                       | pleC1                 | two-component system, cell cycle sensor kinase and response regulator [EC:2.7.13.3]             | Signal Transduction - Enzyme Families                                                                                                                                                               | 2   | 1 |
| K02650                       | pilA                  | type IV pilus assembly protein PilA                                                             | Cell Motility - Signal Transduction - Membrane Transport                                                                                                                                            | 5   | 1 |
| K03092                       | SIG54, rpoN           | RNA polymerase sigma-54 factor                                                                  | Transcription - Signal Transduction - Infectious Diseases                                                                                                                                           | 8   | 1 |
| K03406                       | mcp                   | methyl-accepting chemotaxis protein                                                             | Cell Motility - Signal Transduction                                                                                                                                                                 | 74  | 4 |
| K03407                       | cheA                  | two-component system, chemotaxis family, sensor kinase CheA [EC:2.7.13.3]                       | Cell Motility - Signal Transduction - Enzyme Families                                                                                                                                               | 2   | 2 |
| K03413                       | cheY                  | two-component system, chemotaxis family, response regulator CheY                                | Cell Motility - Signal Transduction                                                                                                                                                                 | 2   | 2 |
| K03563                       | csrA                  | carbon storage regulator                                                                        | Signal Transduction                                                                                                                                                                                 | 5   | 3 |
| K04751                       | glnB                  | nitrogen regulatory protein P-II 1                                                              | Signal Transduction                                                                                                                                                                                 | 1   | 1 |
| K06596                       | chpA                  | chemosensory pil system protein ChpA (sensor histidine kinase/response regulator)               | Cell Motility - Signal Transduction - Enzyme Families                                                                                                                                               | 1   | 1 |
| K07636                       | phoR                  | two-component system, OmpR family, phosphate regulon sensor histidine kinase PhoR [EC:2.7.13.3] | Signal Transduction - Enzyme Families                                                                                                                                                               | 1   | 1 |
| K07639                       | rstB                  | two-component system, OmpR family, sensor histidine kinase RstB [EC:2.7.13.3]                   | Signal Transduction - Enzyme Families                                                                                                                                                               | 25  | 1 |
| K07645                       | qseC                  | two-component system, OmpR family, sensor histidine kinase QseC [EC:2.7.13.3]                   | Signal Transduction - Enzyme Families                                                                                                                                                               | 7   | 2 |
| K07649                       | tctE                  | two-component system, OmpR family, sensor histidine kinase TctE [EC:2.7.13.3]                   | Signal Transduction - Enzyme Families                                                                                                                                                               | 1   | 1 |
| K07665                       | cusR                  | two-component system, OmpR family, copper resistance phosphate regulon response regulator CusR  | Signal Transduction                                                                                                                                                                                 | 1   | 1 |
| K07673                       | narX                  | two-component system, NarL family, nitrate/nitrite sensor histidine kinase NarX [EC:2.7.13.3]   | Signal Transduction - Enzyme Families                                                                                                                                                               | 1   | 1 |
| K07714                       | atoC                  | two-component system, NtrC family, response regulator AtoC                                      | Signal Transduction                                                                                                                                                                                 | 2   | 2 |
| K07774                       | tctD                  | two-component system, OmpR family, response regulator TctD                                      | Signal Transduction                                                                                                                                                                                 | 1   | 1 |
| K07782                       | sdiA                  | LuxR family transcriptional regulator                                                           | Transcription - Signal Transduction                                                                                                                                                                 | 1   | 1 |
| K07787                       | cusA                  | Cu(I/AgI) efflux system membrane protein CusA                                                   | Signal Transduction                                                                                                                                                                                 | 2   | 1 |
| K07788                       | mtiB                  | RND superfamily, multidrug transport protein MtiB                                               | Signal Transduction                                                                                                                                                                                 | 1   | 1 |
| K07794                       | tctB                  | putative tricarboxylic transport membrane protein                                               | Signal Transduction                                                                                                                                                                                 | 1   | 1 |
| K07799                       | mtiA                  | putative multidrug efflux transporter MtiA                                                      | Signal Transduction                                                                                                                                                                                 | 2   | 2 |
| K07806                       | amB, pmrH             | UDP-4-amino-4-deoxy-L-arabinose-oxoglutarate aminotransferase [EC:2.6.1.87]                     | Carbohydrate Metabolism - Signal Transduction - Glycan Biosynthesis and Metabolism - Amino Acid Metabolism                                                                                          | 3   | 2 |
| K08359                       | ttrC                  | tetrathionate reductase subunit C                                                               | Signal Transduction                                                                                                                                                                                 | 1   | 1 |
| K09474                       | phoN                  | acid phosphatase (class A) [EC:3.1.3.2]                                                         | Signal Transduction - Metabolism of Cofactors and Vitamins - Xenobiotics Biodegradation and Metabolism                                                                                              | 8   | 2 |
| K10126                       | dctD                  | two-component system, NtrC family, C4-dicarboxylate transport response regulator DctD           | Signal Transduction                                                                                                                                                                                 | 1   | 1 |
| K10682                       | saeR                  | two-component system, OmpR family, response regulator SaeR                                      | Signal Transduction                                                                                                                                                                                 | 1   | 1 |
| K11331                       | nrsC                  | cation efflux system protein involved in nickel and cobalt tolerance [EC:3.2.1.17]              | Signal Transduction                                                                                                                                                                                 | 24  | 2 |
| ko02030_Bacterial chemotaxis |                       |                                                                                                 |                                                                                                                                                                                                     |     |   |
| K00575                       | cheR                  | chemotaxis protein methyltransferase CheR [EC:2.1.1.80]                                         | Cell Motility - Signal Transduction                                                                                                                                                                 | 1   | 1 |
| K02557                       | motB                  | chemotaxis protein MotB                                                                         | Cell Motility                                                                                                                                                                                       | 1   | 1 |
| K03406                       | mcp                   | methyl-accepting chemotaxis protein                                                             | Cell Motility - Signal Transduction                                                                                                                                                                 | 74  | 4 |
| K03407                       | cheA                  | two-component system, chemotaxis family, sensor kinase CheA [EC:2.7.13.3]                       | Cell Motility - Signal Transduction - Enzyme Families                                                                                                                                               | 2   | 2 |
| K03413                       | cheY                  | two-component system, chemotaxis family, response regulator CheY                                | Cell Motility - Signal Transduction                                                                                                                                                                 | 2   | 2 |
| K03414                       | cheZ                  | chemotaxis protein CheZ                                                                         | Cell Motility                                                                                                                                                                                       | 1   | 1 |
| ko02040_Flagellar assembly   |                       |                                                                                                 |                                                                                                                                                                                                     |     |   |
| K02389                       | flgD                  | flagellar basal-body rod modification protein FlgD                                              | Cell Motility                                                                                                                                                                                       | 1   | 1 |
| K02391                       | flgF                  | flagellar basal-body rod protein FlgF                                                           | Cell Motility                                                                                                                                                                                       | 1   | 1 |
| K02393                       | flgH                  | flagellar L-ring protein precursor FlgH                                                         | Cell Motility                                                                                                                                                                                       | 8   | 2 |
| K02396                       | flgK                  | flagellar hook-associated protein 1 FlgK                                                        | Cell Motility                                                                                                                                                                                       | 1   | 1 |
| K02400                       | flhA                  | flagellar biosynthesis protein FlhA                                                             | Cell Motility - Membrane Transport                                                                                                                                                                  | 1   | 1 |
| K02407                       | flfD                  | flagellar hook-associated protein 2                                                             | Cell Motility                                                                                                                                                                                       | 2   | 2 |
| K02413                       | fljJ                  | flagellar FljJ protein                                                                          | Cell Motility                                                                                                                                                                                       | 1   | 1 |
| K02557                       | motB                  | chemotaxis protein MotB                                                                         | Cell Motility                                                                                                                                                                                       | 1   | 1 |

|                                         |                           |                                                                              |                                                                                                                         |      |   |  |
|-----------------------------------------|---------------------------|------------------------------------------------------------------------------|-------------------------------------------------------------------------------------------------------------------------|------|---|--|
| ko02060_Phosphotransferase system (PTS) |                           |                                                                              |                                                                                                                         |      |   |  |
| K02761                                  | PTS-Cel-EIIC, celB        | PTS system, cellobiose-specific IIC component                                | Membrane Transport                                                                                                      | 2    | 1 |  |
| K02770                                  | PTS-Fru-EIIC, fruA        | PTS system, fructose-specific IIC component                                  | Carbohydrate Metabolism - Membrane Transport                                                                            | 1    | 1 |  |
| K02791                                  | PTS-Mal-EIIC, malX        | PTS system, maltose and glucose-specific IIC component                       | Carbohydrate Metabolism - Membrane Transport                                                                            | 1    | 1 |  |
| K02795                                  | PTS-Man-EIIC, manY        | PTS system, mannose-specific IIC component                                   | Carbohydrate Metabolism - Membrane Transport                                                                            | 1    | 1 |  |
| ko03010_Ribosome                        |                           |                                                                              |                                                                                                                         |      |   |  |
| K02877                                  | RP-L15e, RPL15            | large subunit ribosomal protein L15e                                         | Translation                                                                                                             | 1    | 1 |  |
| K02890                                  | RP-L22, rplY              | large subunit ribosomal protein L22                                          | Translation                                                                                                             | 1    | 1 |  |
| K02896                                  | RP-L24e, RPL24            | large subunit ribosomal protein L24e                                         | Translation                                                                                                             | 1    | 1 |  |
| K02912                                  | RP-L32e, RPL32            | large subunit ribosomal protein L32e                                         | Translation                                                                                                             | 1    | 1 |  |
| K02913                                  | RP-L33, rplG              | large subunit ribosomal protein L33                                          | Translation                                                                                                             | 1    | 1 |  |
| K02935                                  | RP-L7, rplL               | large subunit ribosomal protein L7L12                                        | Translation                                                                                                             | 2    | 1 |  |
| K02936                                  | RP-L7Ae, RPL7A            | large subunit ribosomal protein L7Ae                                         | Translation                                                                                                             | 3    | 1 |  |
| K02945                                  | RP-S1, rpsA               | small subunit ribosomal protein S1                                           | Translation                                                                                                             | 17   | 3 |  |
| K02946                                  | RP-S10, rpsJ              | small subunit ribosomal protein S10                                          | Translation                                                                                                             | 1    | 1 |  |
| K02948                                  | RP-S11, rpsK              | small subunit ribosomal protein S11                                          | Translation                                                                                                             | 1    | 1 |  |
| K02965                                  | RP-S19, rpsS              | small subunit ribosomal protein S19                                          | Translation                                                                                                             | 1    | 1 |  |
| K02968                                  | RP-S20, rpsT              | small subunit ribosomal protein S20                                          | Translation                                                                                                             | 4    | 2 |  |
| K02970                                  | RP-S21, rpsU              | small subunit ribosomal protein S21                                          | Translation                                                                                                             | 18   | 4 |  |
| K02986                                  | RP-S4, rpsD               | small subunit ribosomal protein S4                                           | Translation                                                                                                             | 2    | 2 |  |
| K02995                                  | RP-S8e, RPS8              | small subunit ribosomal protein S8e                                          | Translation                                                                                                             | 1    | 1 |  |
| ko03013_RNA transport                   |                           |                                                                              |                                                                                                                         |      |   |  |
| K00974                                  | cca                       | IRNA nucleotidyltransferase (CCA-adding enzyme) [EC:2.7.7.72 3.1.3.-3.1.4.-] | Translation                                                                                                             | 15   | 6 |  |
| ko03018_RNA degradation                 |                           |                                                                              |                                                                                                                         |      |   |  |
| K00962                                  | prp, PNPT1                | polyribonucleotide nucleotidyltransferase [EC:2.7.7.8]                       | Folding, Sorting and Degradation - Nucleotide Metabolism                                                                | 1    | 1 |  |
| K00970                                  | pcnB                      | poly(A) polymerase [EC:2.7.7.19]                                             | Folding, Sorting and Degradation                                                                                        | 7    | 4 |  |
| K04043                                  | dnaK                      | molecular chaperone DnaK                                                     | Folding, Sorting and Degradation - Infectious Diseases                                                                  | 109  | 6 |  |
| K04077                                  | groEL, HSPD1              | chaperonin GroEL                                                             | Metabolic Diseases - Folding, Sorting and Degradation - Infectious Diseases                                             | 1783 | 8 |  |
| K05592                                  | deaD                      | ATP-dependent RNA helicase DeaD [EC:3.6.4.13]                                | Folding, Sorting and Degradation - Translation                                                                          | 1    | 1 |  |
| K08300                                  | rne                       | ribonuclease E [EC:3.1.26.12]                                                | Folding, Sorting and Degradation - Translation                                                                          | 6    | 2 |  |
| K12573                                  | rnr, vacB                 | ribonuclease R [EC:3.1.-.-]                                                  | Folding, Sorting and Degradation                                                                                        | 3    | 3 |  |
| ko03020_RNA polymerase                  |                           |                                                                              |                                                                                                                         |      |   |  |
| K02405                                  | flaA                      | RNA polymerase sigma factor for flagellar operon FlA                         | Cell Motility - Transcription - Signal Transduction - Infectious Diseases                                               | 7    | 2 |  |
| K03040                                  | rpoA                      | DNA-directed RNA polymerase subunit alpha [EC:2.7.7.6]                       | Transcription - Nucleotide Metabolism - Replication and Repair                                                          | 40   | 7 |  |
| K03041                                  | rpoA1                     | DNA-directed RNA polymerase subunit A' [EC:2.7.7.6]                          | Transcription - Nucleotide Metabolism                                                                                   | 5    | 2 |  |
| K03042                                  | rpoA2                     | DNA-directed RNA polymerase subunit A'' [EC:2.7.7.6]                         | Transcription - Nucleotide Metabolism                                                                                   | 6    | 1 |  |
| K03043                                  | rpoB                      | DNA-directed RNA polymerase subunit beta [EC:2.7.7.6]                        | Transcription - Nucleotide Metabolism - Replication and Repair                                                          | 5    | 5 |  |
| K03044                                  | rpoB1                     | DNA-directed RNA polymerase subunit beta' [EC:2.7.7.6]                       | Transcription - Nucleotide Metabolism                                                                                   | 4    | 3 |  |
| K03045                                  | rpoB2                     | DNA-directed RNA polymerase subunit beta'' [EC:2.7.7.6]                      | Transcription - Nucleotide Metabolism                                                                                   | 2    | 1 |  |
| K03046                                  | rpoC                      | DNA-directed RNA polymerase subunit beta' [EC:2.7.7.6]                       | Transcription - Nucleotide Metabolism - Replication and Repair                                                          | 7    | 4 |  |
| K03053                                  | rpoH                      | DNA-directed RNA polymerase subunit H [EC:2.7.7.6]                           | Transcription - Nucleotide Metabolism                                                                                   | 1    | 1 |  |
| K03056                                  | rpoL                      | DNA-directed RNA polymerase subunit L [EC:2.7.7.6]                           | Transcription - Nucleotide Metabolism                                                                                   | 2    | 1 |  |
| K03060                                  | rpoZ                      | DNA-directed RNA polymerase subunit omega [EC:2.7.7.6]                       | Transcription - Nucleotide Metabolism - Replication and Repair                                                          | 1    | 1 |  |
| K03086                                  | SIG1, rpoD                | RNA polymerase primary sigma factor                                          | Transcription                                                                                                           | 265  | 6 |  |
| K03087                                  | SIG2, rpoS                | RNA polymerase nonessential primary-like sigma factor                        | Transcription - Infectious Diseases                                                                                     | 30   | 3 |  |
| K03088                                  | SIG3.2, rpoE              | RNA polymerase sigma-70 factor, ECF subfamily                                | Transcription                                                                                                           | 20   | 3 |  |
| K03089                                  | SIG3.3.1, rpoH            | RNA polymerase sigma-32 factor                                               | Transcription                                                                                                           | 2    | 1 |  |
| K03090                                  | SIG3.3.2, sigB            | RNA polymerase sigma-B factor                                                | Transcription                                                                                                           | 2    | 2 |  |
| K03091                                  | SIG3.4                    | RNA polymerase sporulation-specific sigma factor                             | Transcription                                                                                                           | 2    | 2 |  |
| K03092                                  | SIG54, rpoN               | RNA polymerase sigma-54 factor                                               | Transcription - Signal Transduction - Infectious Diseases                                                               | 8    | 1 |  |
| K03093                                  | SIGMA70                   | RNA polymerase sigma factor                                                  | Transcription                                                                                                           | 1    | 1 |  |
| K13798                                  | K13798, rpoB              | DNA-directed RNA polymerase subunit B [EC:2.7.7.6]                           | Transcription - Nucleotide Metabolism                                                                                   | 3    | 2 |  |
| ko03022_Basal transcription factors     |                           |                                                                              |                                                                                                                         |      |   |  |
| K03120                                  | TBP, tbp                  | transcription initiation factor TFIID TATA-box-binding protein               | Transcription - Neurodegenerative Diseases                                                                              | 3    | 1 |  |
| K03124                                  | TFIIB, GTF2B, SUA7, tft   | transcription initiation factor TFIIB                                        | Transcription                                                                                                           | 11   | 3 |  |
| K10843                                  | ERCC3, XPB                | DNA excision repair protein ERCC-3 [EC:3.6.4.12]                             | Transcription - Replication and Repair                                                                                  | 4    | 2 |  |
| ko03030_DNA replication                 |                           |                                                                              |                                                                                                                         |      |   |  |
| K01972                                  | E6.5.1.2, ligA, ligB      | DNA ligase (NAD+) [EC:6.5.1.2]                                               | Replication and Repair                                                                                                  | 10   | 2 |  |
| K02314                                  | dnaB                      | replicative DNA helicase [EC:3.6.4.12]                                       | Cell Growth and Death - Replication and Repair                                                                          | 1499 | 9 |  |
| K02316                                  | dnaG                      | DNA primase [EC:2.7.7.-]                                                     | Replication and Repair                                                                                                  | 169  | 6 |  |
| K02335                                  | DPO1, polA                | DNA polymerase I [EC:2.7.7.7]                                                | Nucleotide Metabolism - Replication and Repair                                                                          | 921  | 8 |  |
| K02337                                  | DPO3A1, dnaE              | DNA polymerase III subunit alpha [EC:2.7.7.7]                                | Nucleotide Metabolism - Replication and Repair                                                                          | 178  | 7 |  |
| K02338                                  | DPO3B, dnaN               | DNA polymerase III subunit beta [EC:2.7.7.7]                                 | Nucleotide Metabolism - Replication and Repair                                                                          | 18   | 2 |  |
| K02340                                  | DPO3D1, hoiA              | DNA polymerase III subunit delta [EC:2.7.7.7]                                | Nucleotide Metabolism - Replication and Repair                                                                          | 1    | 1 |  |
| K02341                                  | DPO3D2, hoiB              | DNA polymerase III subunit delta' [EC:2.7.7.7]                               | Nucleotide Metabolism - Replication and Repair                                                                          | 1    | 1 |  |
| K02342                                  | DPO3E, dnaQ               | DNA polymerase III subunit epsilon [EC:2.7.7.7]                              | Nucleotide Metabolism - Replication and Repair                                                                          | 16   | 3 |  |
| K02343                                  | DPO3G, dnaX               | DNA polymerase III subunit gamma/tau [EC:2.7.7.7]                            | Nucleotide Metabolism - Replication and Repair                                                                          | 13   | 3 |  |
| K03111                                  | ssb                       | single-strand DNA-binding protein                                            | Replication and Repair                                                                                                  | 222  | 8 |  |
| K03469                                  | E3.1.26.4A, RNASEH1, rnhA | ribonuclease HI [EC:3.1.26.4]                                                | Replication and Repair                                                                                                  | 3    | 2 |  |
| K03470                                  | rnhB                      | ribonuclease HII [EC:3.1.26.4]                                               | Replication and Repair                                                                                                  | 3    | 3 |  |
| K03763                                  | DPO3A2, polC              | DNA polymerase III subunit alpha, Gram-positive type [EC:2.7.7.7]            | Nucleotide Metabolism - Replication and Repair                                                                          | 9    | 3 |  |
| K10747                                  | LIG1                      | DNA ligase I [EC:6.5.1.1]                                                    | Replication and Repair                                                                                                  | 1    | 1 |  |
| ko03050_Proteasome                      |                           |                                                                              |                                                                                                                         |      |   |  |
| K03420                                  | psmR                      | proteasome regulatory subunit                                                | Folding, Sorting and Degradation                                                                                        | 1    | 1 |  |
| K03433                                  | psmB, prcB                | proteasome beta subunit [EC:3.4.25.1]                                        | Folding, Sorting and Degradation - Enzyme Families                                                                      | 7    | 2 |  |
| ko03060_Protein export                  |                           |                                                                              |                                                                                                                         |      |   |  |
| K03070                                  | secA                      | preprotein translocase subunit SecA                                          | Folding, Sorting and Degradation - Membrane Transport                                                                   | 3    | 3 |  |
| K03073                                  | secE                      | preprotein translocase subunit SecE                                          | Folding, Sorting and Degradation - Membrane Transport                                                                   | 1    | 1 |  |
| K03106                                  | SRP54, ffn                | signal recognition particle subunit SRP54                                    | Folding, Sorting and Degradation - Membrane Transport                                                                   | 1    | 1 |  |
| K03110                                  | ftsY                      | fused signal recognition particle receptor                                   | Folding, Sorting and Degradation - Membrane Transport                                                                   | 2    | 2 |  |
| K03217                                  | ydC, spoIIL, OXA1         | preprotein translocase subunit YidC                                          | Folding, Sorting and Degradation - Membrane Transport                                                                   | 1    | 1 |  |
| ko03070_Bacterial secretion system      |                           |                                                                              |                                                                                                                         |      |   |  |
| K02453                                  | gspD                      | general secretion pathway protein D                                          | Membrane Transport                                                                                                      | 3    | 2 |  |
| K03070                                  | secA                      | preprotein translocase subunit SecA                                          | Folding, Sorting and Degradation - Membrane Transport                                                                   | 3    | 3 |  |
| K03073                                  | secE                      | preprotein translocase subunit SecE                                          | Folding, Sorting and Degradation - Membrane Transport                                                                   | 1    | 1 |  |
| K03106                                  | SRP54, ffn                | signal recognition particle subunit SRP54                                    | Folding, Sorting and Degradation - Membrane Transport                                                                   | 1    | 1 |  |
| K03110                                  | ftsY                      | fused signal recognition particle receptor                                   | Folding, Sorting and Degradation - Membrane Transport                                                                   | 2    | 2 |  |
| K03196                                  | virB11                    | type IV secretion system protein VirB11                                      | Membrane Transport                                                                                                      | 2    | 1 |  |
| K03217                                  | ydC, spoIIL, OXA1         | preprotein translocase subunit YidC                                          | Folding, Sorting and Degradation - Membrane Transport                                                                   | 1    | 1 |  |
| K03223                                  | yscL                      | type III secretion protein SctL                                              | Membrane Transport                                                                                                      | 1    | 1 |  |
| K11891                                  | impl, vasK, lcmF          | type VI secretion system protein Impl                                        | Membrane Transport                                                                                                      | 2    | 2 |  |
| K11904                                  | vgrG                      | type VI secretion system secreted protein VgrG                               | Membrane Transport                                                                                                      | 5    | 2 |  |
| K11907                                  | vasG, clpV                | type VI secretion system protein VasG                                        | Membrane Transport                                                                                                      | 4    | 2 |  |
| ko03320_PPAR signaling pathway          |                           |                                                                              |                                                                                                                         |      |   |  |
| K00249                                  | E1.3.99.3, ACADM, acd     | acyl-CoA dehydrogenase [EC:1.3.99.3]                                         | Carbohydrate Metabolism - Metabolism of Other Amino Acids - Endocrine System - Amino Acid Metabolism - Lipid Metabolism | 1    | 1 |  |
| K00507                                  | SCD, desC                 | stearoyl-CoA desaturase (delta-9 desaturase) [EC:1.14.19.1]                  | Endocrine System - Lipid Metabolism                                                                                     | 13   | 2 |  |

|                                                     |                       |                                                                                     |                                                                                                          |      |   |
|-----------------------------------------------------|-----------------------|-------------------------------------------------------------------------------------|----------------------------------------------------------------------------------------------------------|------|---|
| K00864                                              | E2.7.1.30, glpK       | glycerol kinase [EC:2.7.1.30]                                                       | Environmental Adaptation - Endocrine System - Lipid Metabolism                                           | 3    | 3 |
| K01897                                              | ACSL, fadD            | long-chain acyl-CoA synthetase [EC:6.2.1.3]                                         | Endocrine System - Transport and Catabolism - Lipid Metabolism                                           | 4    | 2 |
| ko03410_Base excision repair                        |                       |                                                                                     |                                                                                                          |      |   |
| K01971                                              | E6.5.1.1, lig         | DNA ligase (ATP) [EC:6.5.1.1]                                                       | Replication and Repair                                                                                   | 71   | 5 |
| K01972                                              | E6.5.1.2, ligA, ligB  | DNA ligase (NAD+) [EC:6.5.1.2]                                                      | Replication and Repair                                                                                   | 10   | 2 |
| K02335                                              | DPO1, polA            | DNA polymerase I [EC:2.7.7.7]                                                       | Nucleotide Metabolism - Replication and Repair                                                           | 921  | 8 |
| K03575                                              | mutY                  | A/G-specific adenine glycosylase [EC:3.2.2.-]                                       | Replication and Repair                                                                                   | 4    | 2 |
| K03648                                              | UNG, UDG              | uracil-DNA glycosylase [EC:3.2.2.-]                                                 | Immune System Diseases - Replication and Repair                                                          | 119  | 3 |
| K07462                                              | recJ                  | single-stranded-DNA-specific exonuclease [EC:3.1.-]                                 | Replication and Repair                                                                                   | 4    | 2 |
| K10563                                              | mutM, fpg             | formamidopyrimidine-DNA glycosylase [EC:3.2.2.23 4.2.99.18]                         | Replication and Repair                                                                                   | 2    | 1 |
| K10747                                              | LIG1                  | DNA ligase 1 [EC:6.5.1.1]                                                           | Replication and Repair                                                                                   | 1    | 1 |
| K10773                                              | NTH                   | endonuclease III [EC:4.2.99.18]                                                     | Replication and Repair                                                                                   | 3    | 2 |
| ko03420_Nucleotide excision repair                  |                       |                                                                                     |                                                                                                          |      |   |
| K01971                                              | E6.5.1.1, lig         | DNA ligase (ATP) [EC:6.5.1.1]                                                       | Replication and Repair                                                                                   | 71   | 5 |
| K01972                                              | E6.5.1.2, ligA, ligB  | DNA ligase (NAD+) [EC:6.5.1.2]                                                      | Replication and Repair                                                                                   | 10   | 2 |
| K02335                                              | DPO1, polA            | DNA polymerase I [EC:2.7.7.7]                                                       | Nucleotide Metabolism - Replication and Repair                                                           | 921  | 8 |
| K03657                                              | uvrD, pcrA            | DNA helicase II / ATP-dependent DNA helicase PcrA [EC:3.6.4.12]                     | Replication and Repair                                                                                   | 110  | 3 |
| K03701                                              | uvrA                  | excinuclease ABC subunit A                                                          | Replication and Repair                                                                                   | 5    | 2 |
| K03702                                              | uvrB                  | excinuclease ABC subunit B                                                          | Replication and Repair                                                                                   | 5    | 2 |
| K03703                                              | uvrC                  | excinuclease ABC subunit C                                                          | Replication and Repair                                                                                   | 78   | 2 |
| K03723                                              | mfd                   | transcription-repair coupling factor (superfamily II helicase) [EC:3.6.4.-]         | Replication and Repair                                                                                   | 2    | 1 |
| K10747                                              | LIG1                  | DNA ligase 1 [EC:6.5.1.1]                                                           | Replication and Repair                                                                                   | 1    | 1 |
| K10843                                              | ERCC3, XPB            | DNA excision repair protein ERCC-3 [EC:3.6.4.12]                                    | Transcription - Replication and Repair                                                                   | 4    | 2 |
| ko03430_Mismatch repair                             |                       |                                                                                     |                                                                                                          |      |   |
| K01141                                              | E3.1.11.1, sbcB       | exodeoxyribonuclease I [EC:3.1.11.1]                                                | Replication and Repair                                                                                   | 1    | 1 |
| K01971                                              | E6.5.1.1, lig         | DNA ligase (ATP) [EC:6.5.1.1]                                                       | Replication and Repair                                                                                   | 71   | 5 |
| K01972                                              | E6.5.1.2, ligA, ligB  | DNA ligase (NAD+) [EC:6.5.1.2]                                                      | Replication and Repair                                                                                   | 10   | 2 |
| K02337                                              | DPO3A1, dnaE          | DNA polymerase III subunit alpha [EC:2.7.7.7]                                       | Nucleotide Metabolism - Replication and Repair                                                           | 178  | 7 |
| K02338                                              | DPO3B, dnaN           | DNA polymerase III subunit beta [EC:2.7.7.7]                                        | Nucleotide Metabolism - Replication and Repair                                                           | 18   | 2 |
| K02340                                              | DPO3D1, hoiA          | DNA polymerase III subunit delta [EC:2.7.7.7]                                       | Nucleotide Metabolism - Replication and Repair                                                           | 1    | 1 |
| K02341                                              | DPO3D2, hoiB          | DNA polymerase III subunit delta' [EC:2.7.7.7]                                      | Nucleotide Metabolism - Replication and Repair                                                           | 1    | 1 |
| K02342                                              | DPO3E, dnaQ           | DNA polymerase III subunit epsilon [EC:2.7.7.7]                                     | Nucleotide Metabolism - Replication and Repair                                                           | 16   | 3 |
| K02343                                              | DPO3G, dnaX           | DNA polymerase III subunit gamma/tau [EC:2.7.7.7]                                   | Nucleotide Metabolism - Replication and Repair                                                           | 13   | 3 |
| K03111                                              | ssb                   | single-strand DNA-binding protein                                                   | Replication and Repair                                                                                   | 222  | 8 |
| K03555                                              | mutS                  | DNA mismatch repair protein MutS                                                    | Replication and Repair                                                                                   | 3    | 3 |
| K03572                                              | mutL                  | DNA mismatch repair protein MutL                                                    | Replication and Repair                                                                                   | 1    | 1 |
| K03601                                              | xseA                  | exodeoxyribonuclease VII large subunit [EC:3.1.11.6]                                | Replication and Repair                                                                                   | 1    | 1 |
| K03657                                              | uvrD, pcrA            | DNA helicase II / ATP-dependent DNA helicase PcrA [EC:3.6.4.12]                     | Replication and Repair                                                                                   | 110  | 3 |
| K03763                                              | DPO3A2, polC          | DNA polymerase III subunit alpha, Gram-positive type [EC:2.7.7.7]                   | Nucleotide Metabolism - Replication and Repair                                                           | 9    | 3 |
| K06223                                              | dam                   | DNA adenine methylase [EC:2.1.1.72]                                                 | Replication and Repair                                                                                   | 127  | 8 |
| K07456                                              | mutS2                 | DNA mismatch repair protein MutS2                                                   | Replication and Repair                                                                                   | 1    | 1 |
| K07462                                              | recJ                  | single-stranded-DNA-specific exonuclease [EC:3.1.-]                                 | Replication and Repair                                                                                   | 4    | 2 |
| K10747                                              | LIG1                  | DNA ligase 1 [EC:6.5.1.1]                                                           | Replication and Repair                                                                                   | 1    | 1 |
| K10857                                              | exoX                  | exodeoxyribonuclease X [EC:3.1.11.-]                                                | Replication and Repair                                                                                   | 1    | 1 |
| ko03440_Homologous recombination                    |                       |                                                                                     |                                                                                                          |      |   |
| K01159                                              | ruvC                  | crossover junction endodeoxyribonuclease RuvC [EC:3.1.22.4]                         | Replication and Repair                                                                                   | 76   | 2 |
| K02335                                              | DPO1, polA            | DNA polymerase I [EC:2.7.7.7]                                                       | Nucleotide Metabolism - Replication and Repair                                                           | 921  | 8 |
| K02337                                              | DPO3A1, dnaE          | DNA polymerase III subunit alpha [EC:2.7.7.7]                                       | Nucleotide Metabolism - Replication and Repair                                                           | 178  | 7 |
| K02338                                              | DPO3B, dnaN           | DNA polymerase III subunit beta [EC:2.7.7.7]                                        | Nucleotide Metabolism - Replication and Repair                                                           | 18   | 2 |
| K02340                                              | DPO3D1, hoiA          | DNA polymerase III subunit delta [EC:2.7.7.7]                                       | Nucleotide Metabolism - Replication and Repair                                                           | 1    | 1 |
| K02341                                              | DPO3D2, hoiB          | DNA polymerase III subunit delta' [EC:2.7.7.7]                                      | Nucleotide Metabolism - Replication and Repair                                                           | 1    | 1 |
| K02342                                              | DPO3E, dnaQ           | DNA polymerase III subunit epsilon [EC:2.7.7.7]                                     | Nucleotide Metabolism - Replication and Repair                                                           | 16   | 3 |
| K02343                                              | DPO3G, dnaX           | DNA polymerase III subunit gamma/tau [EC:2.7.7.7]                                   | Nucleotide Metabolism - Replication and Repair                                                           | 13   | 3 |
| K03111                                              | ssb                   | single-strand DNA-binding protein                                                   | Replication and Repair                                                                                   | 222  | 8 |
| K03551                                              | ruvB                  | holliday junction DNA helicase RuvB                                                 | Replication and Repair                                                                                   | 4    | 2 |
| K03553                                              | recA                  | recombination protein RecA                                                          | Replication and Repair                                                                                   | 335  | 6 |
| K03581                                              | recD                  | exodeoxyribonuclease V alpha subunit [EC:3.1.11.5]                                  | Replication and Repair                                                                                   | 6    | 1 |
| K03582                                              | recB                  | exodeoxyribonuclease V beta subunit [EC:3.1.11.5]                                   | Replication and Repair                                                                                   | 2    | 2 |
| K03629                                              | recF                  | DNA replication and repair protein RecF                                             | Replication and Repair                                                                                   | 1    | 1 |
| K03655                                              | recG                  | ATP-dependent DNA helicase RecG [EC:3.6.4.12]                                       | Replication and Repair                                                                                   | 11   | 3 |
| K03763                                              | DPO3A2, polC          | DNA polymerase III subunit alpha, Gram-positive type [EC:2.7.7.7]                   | Nucleotide Metabolism - Replication and Repair                                                           | 9    | 3 |
| K04066                                              | priA                  | primosomal protein N' (replication factor Y) (superfamily II helicase) [EC:3.6.4.-] | Replication and Repair                                                                                   | 1    | 1 |
| K07462                                              | recJ                  | single-stranded-DNA-specific exonuclease [EC:3.1.-]                                 | Replication and Repair                                                                                   | 4    | 2 |
| ko03450_Non-homologous end-joining                  |                       |                                                                                     |                                                                                                          |      |   |
| K01971                                              | E6.5.1.1, lig         | DNA ligase (ATP) [EC:6.5.1.1]                                                       | Replication and Repair                                                                                   | 71   | 5 |
| ko04011_MAPK signaling pathway - yeast              |                       |                                                                                     |                                                                                                          |      |   |
| K01759                                              | E4.4.1.5, GLO1, gloA  | lactoylglutathione lyase [EC:4.4.1.5]                                               | Carbohydrate Metabolism - Signal Transduction                                                            | 8    | 1 |
| ko04070_Phosphatidylinositol signaling system       |                       |                                                                                     |                                                                                                          |      |   |
| K01092                                              | E3.1.3.25, IMPA, suhB | myo-inositol-1(or 4)-monophosphatase [EC:3.1.3.25]                                  | Carbohydrate Metabolism - Signal Transduction - Biosynthesis of Other Secondary Metabolites              | 3    | 2 |
| ko04112_Cell cycle - Caulobacter                    |                       |                                                                                     |                                                                                                          |      |   |
| K01338                                              | E3.4.21.53, lon       | ATP-dependent Lon protease [EC:3.4.21.53]                                           | Enzyme Families - Cell Growth and Death                                                                  | 5    | 3 |
| K01358                                              | clpP, CLPP            | ATP-dependent Clp protease, protease subunit [EC:3.4.21.92]                         | Enzyme Families - Cell Growth and Death                                                                  | 163  | 6 |
| K02313                                              | dnaA                  | chromosomal replication initiator protein                                           | Signal Transduction - Cell Growth and Death - Replication and Repair                                     | 470  | 2 |
| K02314                                              | dnaB                  | replicative DNA helicase [EC:3.6.4.12]                                              | Cell Growth and Death - Replication and Repair                                                           | 1499 | 9 |
| K03544                                              | clpX, CLPX            | ATP-dependent Clp protease ATP-binding subunit ClpX                                 | Folding, Sorting and Degradation - Cell Growth and Death                                                 | 25   | 6 |
| K03588                                              | ftsW, spoVE           | cell division protein FtsW                                                          | Cell Growth and Death - Replication and Repair                                                           | 1    | 1 |
| K03590                                              | ftsA                  | cell division protein FtsA                                                          | Cell Growth and Death - Replication and Repair                                                           | 1    | 1 |
| K13581                                              | ccrM                  | modification methylase [EC:2.1.1.72]                                                | Cell Growth and Death                                                                                    | 18   | 6 |
| ko04113_Meiosis - yeast                             |                       |                                                                                     |                                                                                                          |      |   |
| K01768                                              | E4.6.1.1              | adenylate cyclase [EC:4.6.1.1]                                                      | Nucleotide Metabolism - Cell Growth and Death                                                            | 61   | 5 |
| ko04115_p53 signaling pathway                       |                       |                                                                                     |                                                                                                          |      |   |
| K10808                                              | RRM2                  | ribonucleoside-diphosphate reductase subunit M2 [EC:1.17.4.1]                       | Metabolism of Other Amino Acids - Nucleotide Metabolism - Cell Growth and Death - Replication and Repair | 67   | 5 |
| ko04122_Sulfur relay system                         |                       |                                                                                     |                                                                                                          |      |   |
| K00566                                              | mnmA, tmU, TRMU       | tRNA-specific 2-thiouridylylase [EC:2.8.1.-]                                        | Folding, Sorting and Degradation                                                                         | 4    | 3 |
| K03154                                              | msiS                  | sulfur carrier protein                                                              | Folding, Sorting and Degradation                                                                         | 1    | 1 |
| K03639                                              | MOC51, moaA           | molybdenum cofactor biosynthesis protein                                            | Folding, Sorting and Degradation - Metabolism of Cofactors and Vitamins                                  | 1    | 1 |
| K04487                                              | iscS, NFS1            | cysteine desulfurase [EC:2.8.1.7]                                                   | Folding, Sorting and Degradation - Metabolism of Cofactors and Vitamins                                  | 4    | 3 |
| K11179                                              | tusE, dsrC            | tRNA 2-thiouridine synthesizing protein E [EC:2.8.1.-]                              | Folding, Sorting and Degradation                                                                         | 1    | 1 |
| ko04141_Protein processing in endoplasmic reticulum |                       |                                                                                     |                                                                                                          |      |   |
| K04079                                              | hspG, HSP90A          | molecular chaperone HspG                                                            | Cancers - Environmental Adaptation - Immune System - Folding, Sorting and Degradation - Endocrine System | 2    | 2 |
| K13993                                              | HSP20                 | HSP20 family protein                                                                | Folding, Sorting and Degradation                                                                         | 10   | 2 |

|                                                 |        |                              |                                                                     |                                                                                                                                          |      |   |
|-------------------------------------------------|--------|------------------------------|---------------------------------------------------------------------|------------------------------------------------------------------------------------------------------------------------------------------|------|---|
| ko04142_Lysosome                                | K12373 | HEXA_B                       | hexosaminidase [EC:3.2.1.52]                                        | Carbohydrate Metabolism - Folding, Sorting and Degradation - Glycan Biosynthesis and Metabolism - Transport and Catabolism               | 1    | 1 |
| ko04146_Peroxisome                              | K00273 | E1.4.3.3, DAO                | D-amino-acid oxidase [EC:1.4.3.3]                                   | Metabolism of Other Amino Acids - Biosynthesis of Other Secondary Metabolites - Transport and Catabolism - Amino Acid Metabolism         | 2    | 1 |
|                                                 | K00869 | E2.7.1.36, MVK, mvkK1        | mevalonate kinase [EC:2.7.1.36]                                     | Transport and Catabolism - Metabolism of Terpenoids and Polyketides                                                                      | 1    | 1 |
|                                                 | K01640 | E4.1.3.4, HMGCL, hmgL        | hydroxymethylglutaryl-CoA lyase [EC:4.1.3.4]                        | Carbohydrate Metabolism - Transport and Catabolism - Metabolism of Terpenoids and Polyketides - Amino Acid Metabolism - Lipid Metabolism | 18   | 1 |
|                                                 | K01897 | ACSL, fadD                   | long-chain acyl-CoA synthetase [EC:6.2.1.3]                         | Endocrine System - Transport and Catabolism - Lipid Metabolism                                                                           | 4    | 2 |
|                                                 | K03781 | katE, CAT                    | catalase [EC:1.11.1.6]                                              | Neurodegenerative Diseases - Transport and Catabolism - Amino Acid Metabolism - Energy Metabolism                                        | 1    | 1 |
|                                                 | K04564 | E1.15.1.1A, sodA, sodB, SOD2 | superoxide dismutase, Fe-Mn family [EC:1.15.1.1]                    | Neurodegenerative Diseases - Transport and Catabolism                                                                                    | 126  | 5 |
|                                                 | K04565 | E1.15.1.1C, sodC, SOD1       | Cu/Zn superoxide dismutase [EC:1.15.1.1]                            | Neurodegenerative Diseases - Transport and Catabolism                                                                                    | 1    | 1 |
| ko04210_Apoptosis                               | K01173 | E3.1.30.-                    | endonuclease [EC:3.1.30.-]                                          | Cell Growth and Death                                                                                                                    | 9    | 2 |
| ko04260_Cardiac muscle contraction              | K00412 | CYTB, petB                   | ubiquinol-cytochrome c reductase cytochrome b subunit [EC:1.10.2.2] | Circulatory System - Neurodegenerative Diseases - Energy Metabolism                                                                      | 7    | 2 |
| ko04510_Focal adhesion                          | K06236 | COL1A5                       | collagen, type I/III/IV/XI, alpha                                   | Digestive System - Signaling Molecules and Interaction - Infectious Diseases - Cell Communication                                        | 15   | 3 |
|                                                 | K06237 | COL4A                        | collagen, type IV, alpha                                            | Cancers - Digestive System - Signaling Molecules and Interaction - Infectious Diseases - Cell Communication                              | 7    | 2 |
| ko04512_ECM-receptor interaction                | K06236 | COL1A5                       | collagen, type I/III/IV/XI, alpha                                   | Digestive System - Signaling Molecules and Interaction - Infectious Diseases - Cell Communication                                        | 15   | 3 |
|                                                 | K06237 | COL4A                        | collagen, type IV, alpha                                            | Cancers - Digestive System - Signaling Molecules and Interaction - Infectious Diseases - Cell Communication                              | 7    | 2 |
| ko04610_Complement and coagulation cascades     | K01344 | PROC                         | protein C (activated) [EC:3.4.21.69]                                | Immune System - Enzyme Families                                                                                                          | 1    | 1 |
| ko04612_Antigen processing and presentation     | K04079 | htpG, HSP90A                 | molecular chaperone HtpG                                            | Cancers - Environmental Adaptation - Immune System - Folding, Sorting and Degradation - Endocrine System                                 | 2    | 2 |
| ko04621_NOD-like receptor signaling pathway     | K04079 | htpG, HSP90A                 | molecular chaperone HtpG                                            | Cancers - Environmental Adaptation - Immune System - Folding, Sorting and Degradation - Endocrine System                                 | 2    | 2 |
| ko04626_Plant-pathogen interaction              | K00864 | E2.7.1.30, glpK              | glycerol kinase [EC:2.7.1.30]                                       | Environmental Adaptation - Endocrine System - Lipid Metabolism                                                                           | 3    | 3 |
|                                                 | K02358 | EF-TU, tufA                  | elongation factor EF-Tu [EC:3.6.5.3]                                | Environmental Adaptation - Translation                                                                                                   | 2    | 2 |
|                                                 | K04079 | htpG, HSP90A                 | molecular chaperone HtpG                                            | Cancers - Environmental Adaptation - Immune System - Folding, Sorting and Degradation - Endocrine System                                 | 2    | 2 |
|                                                 | K13472 | raxST                        | sulfotransferase                                                    | Environmental Adaptation                                                                                                                 | 199  | 5 |
| ko04724_Glutamatergic synapse                   | K01915 | E6.3.1.2, glnA               | glutamine synthetase [EC:6.3.1.2]                                   | Signal Transduction - Nervous System - Amino Acid Metabolism - Energy Metabolism                                                         | 113  | 7 |
| ko04910_Insulin signaling pathway               | K00688 | E2.4.1.1, glgP, PYG          | starch phosphorylase [EC:2.4.1.1]                                   | Carbohydrate Metabolism - Endocrine System                                                                                               | 9    | 3 |
| ko04914_Progesterone-mediated oocyte maturation | K04079 | htpG, HSP90A                 | molecular chaperone HtpG                                            | Cancers - Environmental Adaptation - Immune System - Folding, Sorting and Degradation - Endocrine System                                 | 2    | 2 |
| ko04920_Adipocytokine signaling pathway         | K01897 | ACSL, fadD                   | long-chain acyl-CoA synthetase [EC:6.2.1.3]                         | Endocrine System - Transport and Catabolism - Lipid Metabolism                                                                           | 4    | 2 |
| ko04940_Type I diabetes mellitus                | K04077 | groEL, HSPD1                 | chaperonin GroEL                                                    | Metabolic Diseases - Folding, Sorting and Degradation - Infectious Diseases                                                              | 1783 | 8 |
| ko04964_Proximal tubule bicarbonate reclamation | K00261 | E1.4.1.3                     | glutamate dehydrogenase (NAD(P)+) [EC:1.4.1.3]                      | Metabolism of Other Amino Acids - Excretory System - Amino Acid Metabolism - Energy Metabolism                                           | 3    | 2 |
| ko04973_Carbohydrate digestion and absorption   | K01176 | E3.2.1.1, amyA, maS          | alpha-amylase [EC:3.2.1.1]                                          | Carbohydrate Metabolism - Digestive System                                                                                               | 2    | 1 |
| ko04974_Protein digestion and absorption        | K06236 | COL1A5                       | collagen, type I/III/IV/XI, alpha                                   | Digestive System - Signaling Molecules and Interaction - Infectious Diseases - Cell Communication                                        | 15   | 3 |
|                                                 | K06237 | COL4A                        | collagen, type IV, alpha                                            | Cancers - Digestive System - Signaling Molecules and Interaction - Infectious Diseases - Cell Communication                              | 7    | 2 |
| ko04978_Mineral absorption                      | K00510 | HMOX, hmuO, ho               | heme oxygenase [EC:1.14.99.3]                                       | Digestive System - Metabolism of Cofactors and Vitamins                                                                                  | 2    | 1 |
| ko05010_Alzheimer's disease                     | K00134 | GAPDH, gapA                  | glyceraldehyde 3-phosphate dehydrogenase [EC:1.2.1.12]              | Carbohydrate Metabolism - Neurodegenerative Diseases                                                                                     | 3    | 2 |
|                                                 | K00412 | CYTB, petB                   | ubiquinol-cytochrome c reductase cytochrome b subunit [EC:1.10.2.2] | Circulatory System - Neurodegenerative Diseases - Energy Metabolism                                                                      | 7    | 2 |
| ko05012_Parkinson's disease                     | K00412 | CYTB, petB                   | ubiquinol-cytochrome c reductase cytochrome b subunit [EC:1.10.2.2] | Circulatory System - Neurodegenerative Diseases - Energy Metabolism                                                                      | 7    | 2 |
| ko05014_Amyotrophic lateral sclerosis (ALS)     | K03781 | katE, CAT                    | catalase [EC:1.11.1.6]                                              | Neurodegenerative Diseases - Transport and Catabolism - Amino Acid Metabolism - Energy Metabolism                                        | 1    | 1 |
|                                                 | K04565 | E1.15.1.1C, sodC, SOD1       | Cu/Zn superoxide dismutase [EC:1.15.1.1]                            | Neurodegenerative Diseases - Transport and Catabolism                                                                                    | 1    | 1 |
| ko05016_Huntington's disease                    | K00412 | CYTB, petB                   | ubiquinol-cytochrome c reductase cytochrome b subunit [EC:1.10.2.2] | Circulatory System - Neurodegenerative Diseases - Energy Metabolism                                                                      | 7    | 2 |
|                                                 | K03120 | TBP, tbp                     | transcription initiation factor TFIID TATA-box-binding protein      | Transcription - Neurodegenerative Diseases                                                                                               | 3    | 1 |

|                                                                    |                              |                                                                           |                                                                                                                 |      |   |
|--------------------------------------------------------------------|------------------------------|---------------------------------------------------------------------------|-----------------------------------------------------------------------------------------------------------------|------|---|
| K04564                                                             | E1.15.1.1A, sodA, sodB, SOD2 | superoxide dismutase, Fe-Mn family [EC:1.15.1.1]                          | Neurodegenerative Diseases - Transport and Catabolism                                                           | 126  | 5 |
| K04565                                                             | E1.15.1.1C, sodC, SOD1       | Cu/Zn superoxide dismutase [EC:1.15.1.1]                                  | Neurodegenerative Diseases - Transport and Catabolism                                                           | 1    | 1 |
| ko05020_Prion diseases                                             |                              |                                                                           |                                                                                                                 |      |   |
| K04565                                                             | E1.15.1.1C, sodC, SOD1       | Cu/Zn superoxide dismutase [EC:1.15.1.1]                                  | Neurodegenerative Diseases - Transport and Catabolism                                                           | 1    | 1 |
| ko05100_Bacterial invasion of epithelial cells                     |                              |                                                                           |                                                                                                                 |      |   |
| K13730                                                             | inlA                         | internalin A                                                              | Infectious Diseases                                                                                             | 2    | 2 |
| K13732                                                             | fmbA                         | fibronectin-binding protein A                                             | Infectious Diseases                                                                                             | 2    | 2 |
| K13733                                                             | fmbB                         | fibronectin-binding protein B                                             | Infectious Diseases                                                                                             | 1    | 1 |
| ko05110_Vibrio cholerae infection                                  |                              |                                                                           |                                                                                                                 |      |   |
| K08604                                                             | E3.4.24.25                   | vibriolysin [EC:3.4.24.25]                                                | Enzyme Families - Infectious Diseases                                                                           | 1    | 1 |
| ko05111_Vibrio cholerae pathogenic cycle                           |                              |                                                                           |                                                                                                                 |      |   |
| K02405                                                             | flaA                         | RNA polymerase sigma factor for flagellar operon FIA                      | Cell Motility - Transcription - Signal Transduction - Infectious Diseases                                       | 7    | 2 |
| K03087                                                             | SIG2, rhoS                   | RNA polymerase nonessential primary-like sigma factor                     | Transcription - Infectious Diseases                                                                             | 30   | 3 |
| K03092                                                             | SIG54, rhoN                  | RNA polymerase sigma-54 factor                                            | Transcription - Signal Transduction - Infectious Diseases                                                       | 8    | 1 |
| K07173                                                             | luxS                         | S-ribosylhomocysteine lyase [EC:4.4.1.21]                                 | Infectious Diseases - Amino Acid Metabolism                                                                     | 1    | 1 |
| K08604                                                             | E3.4.24.25                   | vibriolysin [EC:3.4.24.25]                                                | Enzyme Families - Infectious Diseases                                                                           | 1    | 1 |
| K08720                                                             | ompU                         | outer membrane protein OmpU                                               | Infectious Diseases                                                                                             | 2    | 1 |
| ko05120_Epithelial cell signaling in Helicobacter pylori infection |                              |                                                                           |                                                                                                                 |      |   |
| K01428                                                             | ureC                         | urease subunit alpha [EC:3.5.1.5]                                         | Infectious Diseases - Nucleotide Metabolism - Xenobiotics Biodegradation and Metabolism - Amino Acid Metabolism | 2    | 1 |
| ko05142_Chagas disease (American trypanosomiasis)                  |                              |                                                                           |                                                                                                                 |      |   |
| K01354                                                             | ptrB                         | oligopeptidase B [EC:3.4.21.83]                                           | Enzyme Families - Infectious Diseases                                                                           | 2    | 2 |
| ko05143_African trypanosomiasis                                    |                              |                                                                           |                                                                                                                 |      |   |
| K01354                                                             | ptrB                         | oligopeptidase B [EC:3.4.21.83]                                           | Enzyme Families - Infectious Diseases                                                                           | 2    | 2 |
| ko05146_Amoebiasis                                                 |                              |                                                                           |                                                                                                                 |      |   |
| K01476                                                             | E3.5.3.1, rocF, arg          | arginase [EC:3.5.3.1]                                                     | Infectious Diseases - Amino Acid Metabolism                                                                     | 11   | 1 |
| K06236                                                             | COL1AS                       | collagen, type I/III/IV/XI, alpha                                         | Digestive System - Signaling Molecules and Interaction - Infectious Diseases - Cell Communication               | 15   | 3 |
| K06237                                                             | COL4A                        | collagen, type IV, alpha                                                  | Cancers - Digestive System - Signaling Molecules and Interaction - Infectious Diseases - Cell Communication     | 7    | 2 |
| ko05150_Staphylococcus aureus infection                            |                              |                                                                           |                                                                                                                 |      |   |
| K14195                                                             | sasG                         | surface protein G                                                         | Infectious Diseases                                                                                             | 8    | 2 |
| K14205                                                             | mprF, fmcC                   | phosphatidylglycerol lysyltransferase [EC:2.3.2.3]                        | Infectious Diseases                                                                                             | 3    | 1 |
| ko05152_Tuberculosis                                               |                              |                                                                           |                                                                                                                 |      |   |
| K02040                                                             | psfS                         | phosphate transport system substrate-binding protein                      | Signal Transduction - Infectious Diseases - Membrane Transport                                                  | 57   | 4 |
| K04043                                                             | dnaK                         | molecular chaperone DnaK                                                  | Folding, Sorting and Degradation - Infectious Diseases                                                          | 109  | 6 |
| K04077                                                             | groEL, HSPD1                 | chaperonin GroEL                                                          | Metabolic Diseases - Folding, Sorting and Degradation - Infectious Diseases                                     | 1783 | 8 |
| K14952                                                             | namH                         | UDP-MurNAc hydroxylase                                                    | Infectious Diseases                                                                                             | 1    | 1 |
| ko05200_Pathways in cancer                                         |                              |                                                                           |                                                                                                                 |      |   |
| K04079                                                             | htpG, HSP90A                 | molecular chaperone HtpG                                                  | Cancers - Environmental Adaptation - Immune System - Folding, Sorting and Degradation - Endocrine System        | 2    | 2 |
| K06237                                                             | COL4A                        | collagen, type IV, alpha                                                  | Cancers - Digestive System - Signaling Molecules and Interaction - Infectious Diseases - Cell Communication     | 7    | 2 |
| ko05215_Prostate cancer                                            |                              |                                                                           |                                                                                                                 |      |   |
| K04079                                                             | htpG, HSP90A                 | molecular chaperone HtpG                                                  | Cancers - Environmental Adaptation - Immune System - Folding, Sorting and Degradation - Endocrine System        | 2    | 2 |
| ko05222_Small cell lung cancer                                     |                              |                                                                           |                                                                                                                 |      |   |
| K06237                                                             | COL4A                        | collagen, type IV, alpha                                                  | Cancers - Digestive System - Signaling Molecules and Interaction - Infectious Diseases - Cell Communication     | 7    | 2 |
| ko05322_Systemic lupus erythematosus                               |                              |                                                                           |                                                                                                                 |      |   |
| K11089                                                             | TROVE2, SSA2                 | 60 kDa SS-A/Ro ribonucleoprotein                                          | Immune System Diseases                                                                                          | 5    | 4 |
| ko05340_Primary immunodeficiency                                   |                              |                                                                           |                                                                                                                 |      |   |
| K03648                                                             | UNG, UDG                     | uracil-DNA glycosylase [EC:3.2.2.-]                                       | Immune System Diseases - Replication and Repair                                                                 | 119  | 3 |
| no pathway                                                         |                              |                                                                           |                                                                                                                 |      |   |
| K00046                                                             | ldnO                         | gluconate 5-dehydrogenase [EC:1.1.1.69]                                   | Metabolism                                                                                                      | 1    | 1 |
| K00096                                                             | E1.1.1.261                   | glycerol-1-phosphate dehydrogenase [NAD(P)] [EC:1.1.1.261]                | Metabolism                                                                                                      | 1    | 1 |
| K00098                                                             | ldnD                         | L-ldonate 5-dehydrogenase [EC:1.1.1.264]                                  | Metabolism                                                                                                      | 1    | 1 |
| K00153                                                             | E1.1.1.306                   | S-(hydroxymethyl)mycolchol dehydrogenase [EC:1.1.1.306]                   | Metabolism                                                                                                      | 1    | 1 |
| K00344                                                             | E1.6.5.5, qor                | NADPH2:quinone reductase [EC:1.6.5.5]                                     | Metabolism                                                                                                      | 2    | 2 |
| K00346                                                             | nqrA                         | Na+-transporting NADH:ubiquinone oxidoreductase subunit A [EC:1.6.5.-]    | Metabolism                                                                                                      | 1    | 1 |
| K00355                                                             | E1.6.5.2, NQO1               | NAD(P)H dehydrogenase (quinone) [EC:1.6.5.2]                              | Metabolism                                                                                                      | 1    | 1 |
| K00428                                                             | E1.11.1.5                    | cytochrome c peroxidase [EC:1.11.1.5]                                     | Cellular Processes and Signaling                                                                                | 2    | 2 |
| K00435                                                             | E1.11.1.-                    | peroxiredoxin [EC:1.11.1.-]                                               | Genetic Information Processing                                                                                  | 6    | 4 |
| K00518                                                             | E1.15.1.1                    | superoxide dismutase [EC:1.15.1.1]                                        | Cellular Processes and Signaling                                                                                | 2    | 1 |
| K00528                                                             | E1.18.1.2, fpr               | ferredoxin-NADP+ reductase [EC:1.18.1.2]                                  | Metabolism                                                                                                      | 1    | 1 |
| K00540                                                             | E1.-.-.                      |                                                                           | Metabolism                                                                                                      | 5    | 2 |
| K00561                                                             | ermC, ermA                   | 23S rRNA (adenine2085-N6)-dimethyltransferase [EC:2.1.1.184]              | Genetic Information Processing                                                                                  | 1    | 1 |
| K00567                                                             | E2.1.1.63, MGMT, ogt         | methylated-DNA-[protein]-cysteine S-methyltransferase [EC:2.1.1.63]       | Replication and Repair                                                                                          | 2    | 1 |
| K00571                                                             | E2.1.1.72                    | site-specific DNA-methyltransferase (adenine-specific) [EC:2.1.1.72]      | Genetic Information Processing                                                                                  | 212  | 8 |
| K00573                                                             | E2.1.1.77, pcm               | protein-L-isoaspartate(D-aspartate) O-methyltransferase [EC:2.1.1.77]     | Genetic Information Processing                                                                                  | 1    | 1 |
| K00590                                                             | E2.1.1.113                   | site-specific DNA-methyltransferase (cytosine-N4-specific) [EC:2.1.1.113] | Genetic Information Processing                                                                                  | 52   | 4 |
| K00612                                                             | E2.1.3.-                     | carbamoyltransferase [EC:2.1.3.-]                                         | Genetic Information Processing                                                                                  | 221  | 7 |
| K00633                                                             | E2.3.1.1, lacA               | galactoside O-acetyltransferase [EC:2.3.1.16]                             | Metabolism                                                                                                      | 18   | 3 |
| K00638                                                             | E2.3.1.28, cat               | chloramphenicol O-acetyltransferase [EC:2.3.1.28]                         | Metabolism                                                                                                      | 14   | 3 |
| K00661                                                             | E2.3.1.79, maa               | maltose O-acetyltransferase [EC:2.3.1.79]                                 | Metabolism                                                                                                      | 6    | 4 |
| K00666                                                             | K00666                       | fatty-acyl-CoA synthase [EC:6.2.1.-]                                      | Lipid Metabolism                                                                                                | 1    | 1 |
| K00685                                                             | ATE1, ale1                   | arginine-tRNA-protein transferase [EC:2.3.2.8]                            | Genetic Information Processing                                                                                  | 1    | 1 |
| K00809                                                             | E2.5.1.46, dys1              | deoxyhypusine synthase [EC:2.5.1.46]                                      | Genetic Information Processing                                                                                  | 3    | 3 |
| K00837                                                             | E2.6.1.-                     |                                                                           | Metabolism                                                                                                      | 4    | 3 |
| K00870                                                             | E2.7.1.37                    | protein kinase [EC:2.7.1.37]                                              | Cellular Processes and Signaling                                                                                | 1    | 1 |
| K00906                                                             | aceK                         | isocitrate dehydrogenase kinase/phosphatase [EC:2.7.11.5.3.1.3.-]         | Cellular Processes and Signaling                                                                                | 2    | 1 |
| K00924                                                             | E2.7.1.-                     |                                                                           | Cellular Processes and Signaling                                                                                | 1    | 1 |
| K00960                                                             | E2.7.7.6                     | DNA-directed RNA polymerase [EC:2.7.7.6]                                  | Genetic Information Processing                                                                                  | 2    | 1 |
| K00961                                                             | E2.7.7.7                     | DNA polymerase [EC:2.7.7.7]                                               | Genetic Information Processing                                                                                  | 4    | 2 |
| K00996                                                             | E2.7.8.6, rbP                | undecaprenyl-phosphate galactose phosphotransferase [EC:2.7.8.6]          | Glycan Biosynthesis and Metabolism                                                                              | 1    | 1 |
| K01043                                                             | E2.-.-.                      |                                                                           | Metabolism                                                                                                      | 1    | 1 |
| K01090                                                             | E3.1.3.16                    | protein phosphatase [EC:3.1.3.16]                                         | Metabolism                                                                                                      | 4    | 1 |

|        |                              |                                                                             |                                                    |      |   |
|--------|------------------------------|-----------------------------------------------------------------------------|----------------------------------------------------|------|---|
| K01104 | E3.1.3.48                    | protein-tyrosine phosphatase [EC:3.1.3.48]                                  | Cellular Processes and Signaling                   | 2    | 1 |
| K01133 | E3.1.6.6, betC               | choline-sulfatase [EC:3.1.6.6]                                              | Cellular Processes and Signaling                   | 2    | 2 |
| K01138 | K01138                       | uncharacterized sulfatase [EC:3.1.6.-]                                      | Cellular Processes and Signaling                   | 1    | 1 |
| K01143 | E3.1.11.3                    | exodeoxyribonuclease (lambda-induced) [EC:3.1.11.3]                         | Genetic Information Processing                     | 6    | 3 |
| K01144 | E3.1.11.5                    | exodeoxyribonuclease V [EC:3.1.11.5]                                        | Genetic Information Processing                     | 3    | 2 |
| K01153 | hsdR                         | type I restriction enzyme, R subunit [EC:3.1.21.3]                          | Genetic Information Processing                     | 67   | 3 |
| K01154 | hsdS                         | type I restriction enzyme, S subunit [EC:3.1.21.3]                          | Genetic Information Processing                     | 15   | 5 |
| K01155 | E3.1.21.4                    | type II restriction enzyme [EC:3.1.21.4]                                    | Genetic Information Processing                     | 12   | 3 |
| K01156 | res                          | type III restriction enzyme [EC:3.1.21.5]                                   | Genetic Information Processing                     | 11   | 2 |
| K01160 | rusA                         | crossover junction endodeoxyribonuclease RusA [EC:3.1.22.4]                 | Replication and Repair                             | 20   | 3 |
| K01161 | E3.1.25.1                    | deoxyribonuclease (pyrimidine dimer) [EC:3.1.25.1]                          | Metabolism                                         | 1    | 1 |
| K01174 | E3.1.31.1, nuc               | micrococcal nuclease [EC:3.1.31.1]                                          | Genetic Information Processing                     | 13   | 2 |
| K01175 | E3.1.-.-                     |                                                                             | Metabolism                                         | 2    | 2 |
| K01181 | E3.2.1.8, xynA               | endo-1,4-beta-xylanase [EC:3.2.1.8]                                         | Metabolism                                         | 21   | 2 |
| K01185 | E3.2.1.17                    | lysozyme [EC:3.2.1.17]                                                      | Metabolism                                         | 3297 | 7 |
| K01200 | E3.2.1.41                    | pullulanase [EC:3.2.1.41]                                                   | Metabolism                                         | 1    | 1 |
| K01219 | E3.2.1.81                    | agarase [EC:3.2.1.81]                                                       | Metabolism                                         | 1    | 1 |
| K01236 | E3.2.1.141                   | maltooligosyltrehalose trehalohydrolase [EC:3.2.1.141]                      | Metabolism                                         | 1    | 1 |
| K01238 | E3.2.1.-                     |                                                                             | Metabolism                                         | 26   | 2 |
| K01265 | E3.4.11.18, map              | methionyl aminopeptidase [EC:3.4.11.18]                                     | Enzyme Families                                    | 4    | 2 |
| K01269 | E3.4.11.-                    | aminopeptidase [EC:3.4.11.-]                                                | Metabolism                                         | 1    | 1 |
| K01284 | dcp                          | peptidyl-dipeptidase Dcp [EC:3.4.15.5]                                      | Enzyme Families                                    | 1    | 1 |
| K01297 | ldcA                         | muramoyltetrapeptide carboxypeptidase [EC:3.4.17.13]                        | Enzyme Families                                    | 1    | 1 |
| K01299 | E3.4.17.19                   | carboxypeptidase Taq [EC:3.4.17.19]                                         | Enzyme Families                                    | 3    | 2 |
| K01308 | E3.4.19.11                   | g-D-glutamyl-meso-diaminopimelate peptidase [EC:3.4.19.11]                  | Enzyme Families                                    | 1    | 1 |
| K01317 | ACR                          | acrosin [EC:3.4.21.10]                                                      | Enzyme Families                                    | 1    | 1 |
| K01322 | E3.4.21.26, PREP             | prolyl oligopeptidase [EC:3.4.21.26]                                        | Enzyme Families                                    | 1    | 1 |
| K01356 | lexA                         | repressor LexA [EC:3.4.21.88]                                               | Enzyme Families - Replication and Repair           | 8    | 5 |
| K01361 | E3.4.21.96                   | lactocepin [EC:3.4.21.96]                                                   | Folding, Sorting and Degradation - Enzyme Families | 2    | 2 |
| K01362 | E3.4.21.-                    |                                                                             | Metabolism                                         | 30   | 2 |
| K01407 | ptr                          | protease III [EC:3.4.24.55]                                                 | Enzyme Families                                    | 1    | 1 |
| K01409 | E3.4.24.57, gcp              | O-sialoglycoprotein endopeptidase [EC:3.4.24.57]                            | Enzyme Families                                    | 1    | 1 |
| K01417 | E3.4.24.-                    |                                                                             | Metabolism                                         | 3    | 2 |
| K01419 | hslV, clpQ                   | ATP-dependent HslUV protease, peptidase subunit HslV [EC:3.4.25.-]          | Enzyme Families                                    | 1    | 1 |
| K01422 | E3.4.99.-                    |                                                                             | Cellular Processes and Signaling                   | 1    | 1 |
| K01446 | E3.5.1.28                    | N-acetylmuramoyl-L-alanine amidase [EC:3.5.1.28]                            | Cellular Processes and Signaling                   | 10   | 1 |
| K01447 | E3.5.1.28A, cwIA, xyA, xyB   | N-acetylmuramoyl-L-alanine amidase [EC:3.5.1.28]                            | Cellular Processes and Signaling                   | 159  | 4 |
| K01448 | E3.5.1.28B, amiA, amiB, amiC | N-acetylmuramoyl-L-alanine amidase [EC:3.5.1.28]                            | Replication and Repair                             | 257  | 3 |
| K01449 | E3.5.1.28C, cwIJ, sleB       | N-acetylmuramoyl-L-alanine amidase [EC:3.5.1.28]                            | Cellular Processes and Signaling                   | 3    | 2 |
| K01462 | PDF, def                     | peptide deformylase [EC:3.5.1.88]                                           | Metabolism                                         | 23   | 6 |
| K01529 | E3.6.1.-                     |                                                                             | Metabolism                                         | 1    | 1 |
| K01533 | E3.6.3.4, ATP7, copA         | Cu <sup>2+</sup> -exporting ATPase [EC:3.6.3.4]                             | Metabolism                                         | 3    | 2 |
| K01537 | E3.6.3.8                     | Ca <sup>2+</sup> -transporting ATPase [EC:3.6.3.8]                          | Metabolism                                         | 2    | 2 |
| K01551 | E3.6.3.16, arsA              | arsenite-transporting ATPase [EC:3.6.3.16]                                  | Cellular Processes and Signaling                   | 4    | 1 |
| K01669 | E4.1.99.3, phrB              | deoxyribodipyrimidine photo-lyase [EC:4.1.99.3]                             | Replication and Repair                             | 1    | 1 |
| K01724 | E4.2.1.96, PCBD, phhB        | 4a-hydroxytetrahydrobiopterin dehydratase [EC:4.2.1.96]                     | Metabolism                                         | 7    | 2 |
| K01795 | E5.1.3.-                     |                                                                             | Metabolism                                         | 20   | 6 |
| K01802 | E5.2.1.8                     | peptidylprolyl isomerase [EC:5.2.1.8]                                       | Genetic Information Processing                     | 10   | 3 |
| K01854 | glf                          | UDP-galactopyranose mutase [EC:5.4.99.9]                                    | Cellular Processes and Signaling                   | 123  | 5 |
| K01989 | ABC.X4.S                     | putative ABC transport system substrate-binding protein                     | Membrane Transport                                 | 1    | 1 |
| K01990 | ABC-2.A                      | ABC-2 type transport system ATP-binding protein                             | Membrane Transport                                 | 9    | 2 |
| K01991 | ABC-2.OM, wza                | polysaccharide export outer membrane protein                                | Cellular Processes and Signaling                   | 2    | 2 |
| K02003 | ABC.CD.A                     |                                                                             | Membrane Transport                                 | 3    | 2 |
| K02004 | ABC.CD.P                     |                                                                             | Membrane Transport                                 | 4    | 2 |
| K02014 | ABC.FEV.OM                   | iron complex outermembrane receptor protein                                 | Cellular Processes and Signaling                   | 6    | 3 |
| K02023 | ABC.MS.A                     | multiple sugar transport system ATP-binding protein                         | Membrane Transport                                 | 1    | 1 |
| K02025 | ABC.MS.P                     | multiple sugar transport system permease protein                            | Membrane Transport                                 | 2    | 2 |
| K02026 | ABC.MS.P1                    | multiple sugar transport system permease protein                            | Membrane Transport                                 | 3    | 3 |
| K02027 | ABC.MS.S                     | multiple sugar transport system substrate-binding protein                   | Membrane Transport                                 | 3    | 1 |
| K02055 | ABC.SP.S                     | putative spermidine/putrescine transport system substrate-binding protein   | Membrane Transport                                 | 1    | 1 |
| K02058 | ABC.SS.S                     | simple sugar transport system substrate-binding protein                     | Membrane Transport                                 | 4    | 2 |
| K02065 | ABC.X1.A                     | putative ABC transport system ATP-binding protein                           | Membrane Transport                                 | 1    | 1 |
| K02066 | ABC.X1.P                     | putative ABC transport system permease protein                              | Membrane Transport                                 | 1    | 1 |
| K02078 | acpP                         | acyl carrier protein                                                        | Metabolism                                         | 2    | 1 |
| K02198 | ccmF                         | cytochrome c-type biogenesis protein CcmF                                   | Cellular Processes and Signaling                   | 1    | 1 |
| K02238 | comEC                        | competence protein ComEC                                                    | Membrane Transport                                 | 2    | 2 |
| K02283 | cpaF, tadA                   | pilus assembly protein CpaF                                                 | Cell Motility - Membrane Transport                 | 1    | 1 |
| K02315 | dnaC                         | DNA replication protein DnaC                                                | Replication and Repair                             | 20   | 1 |
| K02334 | dpo                          | DNA polymerase bacteriophage-type [EC:2.7.7.7]                              | Genetic Information Processing                     | 190  | 7 |
| K02336 | DPO2, polB                   | DNA polymerase II [EC:2.7.7.7]                                              | Replication and Repair                             | 27   | 2 |
| K02346 | DPO4, dinB                   | DNA polymerase IV [EC:2.7.7.7]                                              | Replication and Repair                             | 1    | 1 |
| K02355 | EF-G, fusA                   | elongation factor EF-G [EC:3.6.5.3]                                         | Translation                                        | 2    | 2 |
| K02395 | flgJ                         | flagellar protein FlgJ                                                      | Cell Motility                                      | 47   | 3 |
| K02404 | flhF                         | flagellar biosynthesis protein FlhF                                         | Cell Motility                                      | 1    | 1 |
| K02437 | gcvH                         | glycine cleavage system H protein                                           | Metabolism                                         | 1    | 1 |
| K02440 | GLPF                         | glycerol uptake facilitator protein                                         | Signaling Molecules and Interaction                | 1    | 1 |
| K02469 | gyrA                         | DNA gyrase subunit A [EC:5.99.1.3]                                          | Replication and Repair                             | 18   | 3 |
| K02470 | gyrB                         | DNA gyrase subunit B [EC:5.99.1.3]                                          | Replication and Repair                             | 15   | 3 |
| K02481 | K02481                       | two-component system, NtrC family, response regulator                       | Signal Transduction                                | 1    | 1 |
| K02493 | hemK                         | methyltransferase [EC:2.1.1.-]                                              | Genetic Information Processing                     | 3    | 2 |
| K02503 | hit                          | Hit-like protein involved in cell-cycle regulation                          | Poorly Characterized                               | 1    | 1 |
| K02518 | IF-1, infA                   | translation initiation factor IF-1                                          | Translation                                        | 4    | 4 |
| K02519 | IF-2, infB                   | translation initiation factor IF-2                                          | Translation                                        | 3    | 2 |
| K02520 | IF-3, infC                   | translation initiation factor IF-3                                          | Translation                                        | 6    | 2 |
| K02528 | ksaA                         | 16S rRNA (adenine1518-N6:adenine1519-N6)-dimethyltransferase [EC:2.1.1.182] | Translation                                        | 2    | 1 |
| K02598 | nirC                         | nitrite transporter NirC                                                    | Cellular Processes and Signaling                   | 2    | 1 |
| K02601 | nusG                         | transcriptional antiterminator NusG                                         | Translation                                        | 6    | 2 |
| K02609 | paaA                         | phenylacetic acid degradation protein                                       | Poorly Characterized                               | 11   | 2 |
| K02622 | parE                         | topoisomerase IV subunit B [EC:5.99.1.-]                                    | Replication and Repair                             | 4    | 4 |
| K02666 | piQ                          | type IV pilus assembly protein PiQ                                          | Cell Motility - Membrane Transport                 | 2    | 1 |
| K02674 | piY1                         | type IV pilus assembly protein PiY1                                         | Cell Motility - Membrane Transport                 | 2    | 1 |
| K02687 | prmA                         | ribosomal protein L11 methyltransferase [EC:2.1.1.-]                        | Genetic Information Processing                     | 1    | 1 |
| K02715 | psbN                         | PsbN protein                                                                | Poorly Characterized                               | 2    | 1 |
| K02742 | sprT                         | SprT protein                                                                | Poorly Characterized                               | 1    | 1 |
| K02805 | rffA, wecE                   | lipopolysaccharide biosynthesis protein                                     | Amino Acid Metabolism                              | 5    | 3 |
| K02835 | RF-1, prfA                   | peptide chain release factor RF-1                                           | Translation                                        | 1    | 1 |
| K02837 | RF-3, prfC                   | peptide chain release factor RF-3                                           | Translation                                        | 1    | 1 |
| K03168 | topA                         | DNA topoisomerase I [EC:5.99.1.2]                                           | Replication and Repair                             | 10   | 3 |
| K03207 | wcaH                         | colanic acid biosynthesis protein WcaH [EC:3.6.1.-]                         | Metabolism                                         | 3    | 3 |
| K03281 | TC.CIC                       | chloride channel protein, CIC family                                        | Cellular Processes and Signaling                   | 2    | 1 |
| K03284 | TC.MIT                       | metal ion transporter, MIT family                                           | Cellular Processes and Signaling                   | 8    | 3 |
| K03286 | TC.OOP                       | OmpA-OmpF porin, OOP family                                                 | Cellular Processes and Signaling                   | 3    | 2 |
| K03292 | TC.GPH                       | glycoside/pentoside/hexuronide:cation symporter, GPH family                 | Cellular Processes and Signaling                   | 1    | 1 |
| K03293 | TC.AAT                       | amino acid transporter, AAT family                                          | Cellular Processes and Signaling                   | 1    | 1 |
| K03294 | TC.APA                       | basic amino acid/polyamine antiporter, APA family                           | Cellular Processes and Signaling                   | 1    | 1 |
| K03295 | TC.CDF                       | cation efflux system protein, CDF family                                    | Cellular Processes and Signaling                   | 1    | 1 |
| K03296 | TC.HAE1                      | hydrophobic/amphiphilic exporter-1 (mainly G- bacteria), HAE1 family        | Cellular Processes and Signaling                   | 1    | 1 |
| K03298 | TC.DME                       | drug/metabolite transporter, DME family                                     | Cellular Processes and Signaling                   | 1    | 1 |
| K03299 | TC.GNTP                      | gluconate/H <sup>+</sup> symporter, GntP family                             | Cellular Processes and Signaling                   | 1    | 1 |
| K03303 | TC.LCPT                      | lactate transporter, LctP family                                            | Cellular Processes and Signaling                   | 1    | 1 |

|        |                        |                                                                                  |                                                           |      |   |
|--------|------------------------|----------------------------------------------------------------------------------|-----------------------------------------------------------|------|---|
| K03307 | TC.SSS                 | solute:Na+ symporter, SSS family                                                 | Cellular Processes and Signaling                          | 1    | 1 |
| K03320 | TC.AMT                 | ammonium transporter, Amt family                                                 | Cellular Processes and Signaling                          | 2    | 2 |
| K03328 | TC.PST                 | polysaccharide transporter, PST family                                           | Cellular Processes and Signaling                          | 1    | 1 |
| K03386 | E1.1.1.15, PRDX, ahpC  | peroxiredoxin (alkyl hydroperoxide reductase subunit C) [EC:1.11.1.15]           | Genetic Information Processing                            | 6    | 5 |
| K03427 | hsdM                   | type I restriction enzyme M protein [EC:2.1.1.72]                                | Genetic Information Processing                            | 29   | 5 |
| K03438 | mraW                   | S-adenosyl-methyltransferase [EC:2.1.1.-]                                        | Cellular Processes and Signaling                          | 2    | 2 |
| K03439 | E2.1.1.33              | tRNA (guanine-N7-)-methyltransferase [EC:2.1.1.33]                               | Metabolism                                                | 7    | 2 |
| K03457 | TC.NCS1                | nucleobase:cation symporter-1, NCS1 family                                       | Cellular Processes and Signaling                          | 4    | 1 |
| K03466 | ftsK, spoIIIE          | DNA segregation ATPase FtsK/SpoIIIE, S-DNA-T family                              | Replication and Repair                                    | 15   | 3 |
| K03495 | gidA                   | glucose inhibited division protein A                                             | Replication and Repair                                    | 1    | 1 |
| K03496 | parA, soj              | chromosome partitioning protein                                                  | Cell Motility - Replication and Repair                    | 80   | 5 |
| K03497 | parB, spoJ             | chromosome partitioning protein, ParB family                                     | Cell Motility - Transcription - Replication and Repair    | 25   | 7 |
| K03502 | DPO5C, umuC            | DNA polymerase V                                                                 | Replication and Repair                                    | 6    | 2 |
| K03503 | DPO5D, umuD            | DNA polymerase V [EC:3.4.21.-]                                                   | Enzyme Families - Replication and Repair                  | 4    | 2 |
| K03521 | fixA, etfB             | electron transfer flavoprotein beta subunit                                      | Metabolism                                                | 1    | 1 |
| K03522 | fixB, etfA             | electron transfer flavoprotein alpha subunit                                     | Metabolism                                                | 2    | 2 |
| K03523 | bioY                   | putative biotin biosynthesis protein BioY                                        | Poorly Characterized                                      | 1    | 1 |
| K03529 | smc                    | chromosome segregation protein                                                   | Replication and Repair                                    | 7    | 1 |
| K03530 | hupB                   | DNA-binding protein HU-beta                                                      | Replication and Repair                                    | 3    | 2 |
| K03545 | tig                    | trigger factor                                                                   | Genetic Information Processing                            | 9    | 4 |
| K03546 | sbcC                   | exonuclease SbcC                                                                 | Replication and Repair                                    | 55   | 5 |
| K03547 | sbcD                   | exonuclease SbcD                                                                 | Replication and Repair                                    | 4    | 2 |
| K03561 | exbB                   | biopolymer transport protein ExbB                                                | Cellular Processes and Signaling                          | 1    | 1 |
| K03574 | MUTT, NUDT1, MTH1      | 7,8-dihydro-8-oxoguanine triphosphatase [EC:3.6.1.-]                             | Replication and Repair                                    | 12   | 2 |
| K03578 | hrpA                   | ATP-dependent helicase HrpA [EC:3.6.4.13]                                        | Genetic Information Processing                            | 1    | 1 |
| K03580 | hepA                   | ATP-dependent helicase HepA [EC:3.6.4.-]                                         | Genetic Information Processing                            | 6    | 1 |
| K03585 | acrA                   | membrane fusion protein                                                          | Replication and Repair                                    | 1    | 1 |
| K03596 | lepA                   | GTP-binding protein LepA                                                         | Cellular Processes and Signaling                          | 2    | 2 |
| K03606 | wcaJ                   | putative colanic acid biosynthesis UDP-glucose lipid carrier transferase         | Cellular Processes and Signaling                          | 1    | 1 |
| K03624 | greA                   | transcription elongation factor GreA                                             | Genetic Information Processing                            | 1    | 1 |
| K03625 | nusB                   | N utilization substance protein B                                                | Translation                                               | 1    | 1 |
| K03630 | radC                   | DNA repair protein RadC                                                          | Genetic Information Processing                            | 21   | 5 |
| K03641 | toiB                   | ToiB protein                                                                     | Cellular Processes and Signaling                          | 1    | 1 |
| K03642 | ripA                   | rare lipoprotein A                                                               | Cellular Processes and Signaling                          | 87   | 2 |
| K03643 | lptE, rlpB             | LPS-assembly lipoprotein                                                         | Cellular Processes and Signaling                          | 1    | 1 |
| K03646 | toiA                   | colicin import membrane protein                                                  | Cellular Processes and Signaling                          | 5    | 2 |
| K03656 | rep                    | ATP-dependent DNA helicase Rep [EC:3.6.4.12]                                     | Replication and Repair                                    | 1    | 1 |
| K03664 | smgB                   | SsrA-binding protein                                                             | Genetic Information Processing                            | 40   | 2 |
| K03671 | trxA                   | thioredoxin 1                                                                    | Folding, Sorting and Degradation                          | 136  | 4 |
| K03672 | trxC                   | thioredoxin 2 [EC:1.8.1.8]                                                       | Folding, Sorting and Degradation                          | 10   | 2 |
| K03676 | gncX, GLRX, GLRX2      | glutaredoxin 3                                                                   | Folding, Sorting and Degradation                          | 42   | 6 |
| K03684 | rnd                    | ribonuclease D [EC:3.1.13.5]                                                     | Genetic Information Processing                            | 5    | 2 |
| K03696 | dnaJ                   | molecular chaperone DnaJ                                                         | Folding, Sorting and Degradation                          | 65   | 4 |
| K03694 | cipA                   | ATP-dependent Clp protease ATP-binding subunit CipA                              | Folding, Sorting and Degradation                          | 28   | 5 |
| K03695 | cipB                   | ATP-dependent Clp protease ATP-binding subunit CipB                              | Folding, Sorting and Degradation                          | 45   | 6 |
| K03696 | cipC                   | ATP-dependent Clp protease ATP-binding subunit CipC                              | Folding, Sorting and Degradation                          | 342  | 8 |
| K03697 | cipE                   | ATP-dependent Clp protease ATP-binding subunit CipE                              | Folding, Sorting and Degradation                          | 7    | 3 |
| K03704 | cspA                   | cold shock protein (beta-ribbon, CspA family)                                    | Transcription                                             | 2    | 2 |
| K03711 | fur                    | Fur family transcriptional regulator, ferric uptake regulator                    | Transcription                                             | 2    | 1 |
| K03716 | spB                    | spore photoprotectant lyase [EC:4.1.99.-]                                        | Genetic Information Processing                            | 6    | 2 |
| K03721 | tyrR                   | transcriptional regulator of aroF, aroG, tyrA and aromatic amino acid transport  | Transcription                                             | 3    | 1 |
| K03724 | lhr                    | ATP-dependent helicase Lhr and Lhr-like helicase [EC:3.6.4.-]                    | Replication and Repair                                    | 1    | 1 |
| K03726 | helS                   | helicase [EC:3.6.4.-]                                                            | Genetic Information Processing                            | 3    | 1 |
| K03727 | helY                   | ATP-dependent RNA helicase HelY [EC:3.6.4.-]                                     | Genetic Information Processing                            | 1    | 1 |
| K03733 | xerC                   | integrase/recombinase XerC                                                       | Replication and Repair                                    | 25   | 2 |
| K03743 | K03743                 |                                                                                  | Poorly Characterized                                      | 4    | 4 |
| K03744 | lemA                   | LemA protein                                                                     | Poorly Characterized                                      | 1    | 1 |
| K03750 | moeA                   | molybdopterin biosynthesis protein MoeA                                          | Metabolism                                                | 3    | 2 |
| K03762 | proP                   | MFS transporter, MHS family, proline/betaine transporter                         | Membrane Transport                                        | 1    | 1 |
| K03767 | PP1A                   | peptidyl-prolyl cis-trans isomerase A (cyclophilin A) [EC:5.2.1.8]               | Folding, Sorting and Degradation                          | 2    | 2 |
| K03768 | PP1B, ppiB             | peptidyl-prolyl cis-trans isomerase B (cyclophilin B) [EC:5.2.1.8]               | Folding, Sorting and Degradation                          | 24   | 2 |
| K03771 | surA                   | peptidyl-prolyl cis-trans isomerase SurA [EC:5.2.1.8]                            | Folding, Sorting and Degradation                          | 1    | 1 |
| K03774 | slpA                   | FKBP-type peptidyl-prolyl cis-trans isomerase SlpA [EC:5.2.1.8]                  | Folding, Sorting and Degradation                          | 7    | 3 |
| K03775 | slpD                   | FKBP-type peptidyl-prolyl cis-trans isomerase SlpD [EC:5.2.1.8]                  | Folding, Sorting and Degradation                          | 7    | 1 |
| K03789 | rmi                    | ribosomal-protein-alanine N-acetyltransferase [EC:2.3.1.128]                     | Translation                                               | 3    | 2 |
| K03791 | K03791                 | putative chitinase                                                               | Poorly Characterized                                      | 1162 | 6 |
| K03796 | bax                    | Bax protein                                                                      | Poorly Characterized                                      | 45   | 3 |
| K03797 | E3.4.21.102, prc, ctpA | carboxyl-terminal processing protease [EC:3.4.21.102]                            | Enzyme Families                                           | 1    | 1 |
| K03798 | ftsH, hflB             | cell division protease FtsH [EC:3.4.24.-]                                        | Folding, Sorting and Degradation - Enzyme Families        | 3    | 2 |
| K03802 | cphA                   | cyanophycin synthetase [EC:6.-.-.]                                               | Cellular Processes and Signaling                          | 4    | 1 |
| K03806 | ampD                   | AmpD protein                                                                     | Cellular Processes and Signaling                          | 2    | 1 |
| K03818 | wcaF                   | putative colanic acid biosynthesis acetyltransferase WcaF [EC:2.3.1.-]           | Metabolism                                                | 1    | 1 |
| K03832 | tonB                   | periplasmic protein TonB                                                         | Cellular Processes and Signaling                          | 3    | 2 |
| K03839 | fldA                   | flavodoxin I                                                                     | Metabolism                                                | 6    | 1 |
| K03840 | fldB                   | flavodoxin II                                                                    | Metabolism                                                | 1    | 1 |
| K03924 | moxR                   | MoxR-like ATPase [EC:3.6.3.-]                                                    | Metabolism                                                | 16   | 4 |
| K03977 | engA                   | GTP-binding protein                                                              | Translation                                               | 3    | 1 |
| K03979 | obg                    | GTP-binding protein                                                              | Translation                                               | 2    | 1 |
| K04024 | euJ                    | ethanolamine utilization protein EuJ                                             | Metabolism                                                | 1    | 1 |
| K04047 | dps                    | starvation-inducible DNA-binding protein                                         | Replication and Repair                                    | 66   | 2 |
| K04068 | nrdG                   | anaerobic ribonucleoside-triphosphate reductase activating protein [EC:1.97.1.4] | Genetic Information Processing                            | 4    | 2 |
| K04075 | tis, mesJ              | tRNA(ile)-lysidine synthase [EC:6.3.4.-]                                         | Genetic Information Processing                            | 2    | 2 |
| K04078 | groES, HSPe1           | chaperonin GroES                                                                 | Folding, Sorting and Degradation                          | 308  | 4 |
| K04080 | lbpA                   | molecular chaperone lbpA                                                         | Folding, Sorting and Degradation                          | 78   | 6 |
| K04090 | E1.2.7.8               | indolepyruvate ferredoxin oxidoreductase [EC:1.2.7.8]                            | Metabolism                                                | 1    | 1 |
| K04091 | ssuD                   | alkanesulfonate monooxygenase [EC:1.14.14.5]                                     | Metabolism                                                | 3    | 2 |
| K04095 | fic                    | cell filamentation protein                                                       | Replication and Repair                                    | 1    | 1 |
| K04096 | smf                    | DNA processing protein                                                           | Genetic Information Processing                            | 1    | 1 |
| K04338 | csfG                   | curli production assembly/transport component CsfG                               | Membrane Transport                                        | 1    | 1 |
| K04483 | radA                   | DNA repair protein RadA                                                          | Replication and Repair                                    | 1    | 1 |
| K04485 | sms, radA              | DNA repair protein RadA/Sms                                                      | Replication and Repair                                    | 1    | 1 |
| K04488 | iscU, nifU             | nitrogen fixation protein NifU and related proteins                              | Replication and Repair                                    | 110  | 2 |
| K04651 | hypA                   | hydrogenase nickel incorporation protein HypA                                    | Metabolism                                                | 97   | 5 |
| K04652 | hypB                   | hydrogenase nickel incorporation protein HypB                                    | Genetic Information Processing                            | 1    | 1 |
| K04654 | hypD                   | hydrogenase expression/formation protein HypD                                    | Genetic Information Processing                            | 5    | 1 |
| K04744 | lptD, imp, osta        | LPS-assembly protein                                                             | Cellular Processes and Signaling                          | 1    | 1 |
| K04750 | phrB                   | PhrB protein                                                                     | Poorly Characterized                                      | 1    | 1 |
| K04756 | ahpD                   | alkyl hydroperoxide reductase subunit D                                          | Poorly Characterized                                      | 1    | 1 |
| K04758 | feoA                   | ferrous iron transport protein A                                                 | Cellular Processes and Signaling                          | 1    | 1 |
| K04759 | feoB                   | ferrous iron transport protein B                                                 | Cellular Processes and Signaling                          | 1    | 1 |
| K04763 | xerD                   | integrase/recombinase XerD                                                       | Replication and Repair                                    | 58   | 6 |
| K04768 | acuC                   | acetoin utilization protein AcuC                                                 | Metabolism                                                | 4    | 2 |
| K04773 | sppA                   | protease IV [EC:3.4.21.-]                                                        | Enzyme Families                                           | 10   | 2 |
| K04800 | rfcL                   | replication factor C large subunit                                               | Replication and Repair                                    | 3    | 2 |
| K04801 | rfcS                   | replication factor C small subunit                                               | Replication and Repair                                    | 456  | 7 |
| K05303 | E2.1.1.101             | macrocin O-methyltransferase [EC:2.1.1.101]                                      | Metabolism                                                | 7    | 2 |
| K05337 | fer                    | ferredoxin                                                                       | Metabolism                                                | 9    | 3 |
| K05516 | cbpA                   | curved DNA-binding protein                                                       | Folding, Sorting and Degradation - Replication and Repair | 27   | 5 |
| K05520 | pfpl                   | protease I [EC:3.2.-.]                                                           | Enzyme Families                                           | 10   | 2 |
| K05521 | draG                   | ADP-ribosylglycohydrolase [EC:3.2.-.]                                            | Genetic Information Processing                            | 8    | 2 |
| K05524 | fdxA                   | ferredoxin                                                                       | Metabolism                                                | 12   | 7 |

|        |            |                                                                    |                                  |      |   |
|--------|------------|--------------------------------------------------------------------|----------------------------------|------|---|
| K05548 | benK       | MFS transporter, AAHS family, benzoate transport protein           | Membrane Transport               | 1    | 1 |
| K05559 | phaA       | multicomponent K <sup>+</sup> -H <sup>+</sup> antiporter subunit A | Cellular Processes and Signaling | 1    | 1 |
| K05786 | rarD       | chloramphenicol-sensitive protein RarD                             | Cellular Processes and Signaling | 1    | 1 |
| K05795 | terD       | tellurium resistance protein TerD                                  | Cellular Processes and Signaling | 1    | 1 |
| K05807 | comL       | putative lipoprotein                                               | Poorly Characterized             | 1    | 1 |
| K05838 | ybnN       | putative thioredoxin                                               | Folding, Sorting and Degradation | 4    | 2 |
| K05844 | rimK       | ribosomal protein S6 modification protein                          | Translation                      | 7    | 2 |
| K05989 | E3.2.1.40  | alpha-L-rhamnosidase [EC:3.2.1.40]                                 | Metabolism                       | 1    | 1 |
| K06013 | E3.4.24.84 | STE24 endopeptidase [EC:3.4.24.84]                                 | Enzyme Families                  | 1    | 1 |
| K06024 | scpB       | segregation and condensation protein B                             | Replication and Repair           | 1    | 1 |
| K06041 | E5.3.1.13  | arabinose-5-phosphate isomerase [EC:5.3.1.13]                      | Cellular Processes and Signaling | 7    | 3 |
| K06048 | ybdK       | carboxylate-amine ligase [EC:6.3.-.-]                              | Metabolism                       | 1    | 1 |
| K06135 | pqaA       | pyrroloquinoline quinone biosynthesis protein A                    | Poorly Characterized             | 9    | 2 |
| K06143 | creD       | inner membrane protein                                             | Cellular Processes and Signaling | 1    | 1 |
| K06147 | ABCB-BAC   | ATP-binding cassette, subfamily B, bacterial                       | Membrane Transport               | 5    | 2 |
| K06158 | ABCF3      | ATP-binding cassette, sub-family F, member 3                       | Genetic Information Processing   | 1    | 1 |
| K06168 | miaB       | bifunctional enzyme involved in thiolation and methylation of tRNA | Genetic Information Processing   | 1    | 1 |
| K06177 | riuA       | ribosomal large subunit pseudouridine synthase A [EC:5.4.99.12]    | Translation                      | 1    | 1 |
| K06178 | riuB       | ribosomal large subunit pseudouridine synthase B [EC:5.4.99.12]    | Translation                      | 1    | 1 |
| K06180 | riuD       | ribosomal large subunit pseudouridine synthase D [EC:5.4.99.12]    | Translation                      | 1    | 1 |
| K06189 | corC       | magnesium and cobalt transporter                                   | Cellular Processes and Signaling | 1    | 1 |
| K06192 | pqiB       | paraquat-inducible protein B                                       | Poorly Characterized             | 2    | 1 |
| K06204 | dksA       | DnaK suppressor protein                                            | Translation - Transcription      | 3    | 2 |
| K06214 | csjG       | curli production assembly/transport component CsgG                 | Membrane Transport               | 23   | 6 |
| K06217 | phoH, phoL | phosphate starvation-inducible protein PhoH and related proteins   | Cellular Processes and Signaling | 475  | 7 |
| K06351 | kipl       | inhibitor of KinA                                                  | Cellular Processes and Signaling | 1    | 1 |
| K06400 | spoVCA     | site-specific DNA recombinase                                      | Cellular Processes and Signaling | 6    | 3 |
| K06405 | spoVAC     | stage V sporulation protein AC                                     | Cellular Processes and Signaling | 1    | 1 |
| K06415 | spoVR      | stage V sporulation protein R                                      | Cellular Processes and Signaling | 20   | 4 |
| K06416 | spoVS      | stage V sporulation protein S                                      | Cellular Processes and Signaling | 8    | 2 |
| K06860 | K06860     |                                                                    | Poorly Characterized             | 1    | 1 |
| K06872 | K06872     |                                                                    | Poorly Characterized             | 1    | 1 |
| K06877 | K06877     |                                                                    | Poorly Characterized             | 2    | 1 |
| K06879 | queF       | 7-cyano-7-deazaguanine reductase [EC:1.7.1.13]                     | Poorly Characterized             | 49   | 4 |
| K06881 | K06881     |                                                                    | Poorly Characterized             | 1    | 1 |
| K06884 | K06884     |                                                                    | Poorly Characterized             | 11   | 1 |
| K06885 | K06885     |                                                                    | Poorly Characterized             | 1    | 1 |
| K06890 | K06890     |                                                                    | Poorly Characterized             | 9    | 3 |
| K06891 | clpS       | ATP-dependent Clp protease adaptor protein ClpS                    | Genetic Information Processing   | 31   | 4 |
| K06894 | K06894     |                                                                    | Poorly Characterized             | 1    | 1 |
| K06901 | pbuG       | putative MFS transporter, AGZA family, xanthine/uracil permease    | Membrane Transport               | 4    | 3 |
| K06902 | UMF1       | MFS transporter, UMF1 family                                       | Membrane Transport               | 1    | 1 |
| K06903 | K06903     |                                                                    | Poorly Characterized             | 131  | 3 |
| K06904 | K06904     |                                                                    | Poorly Characterized             | 496  | 6 |
| K06905 | K06905     |                                                                    | Poorly Characterized             | 4    | 1 |
| K06906 | K06906     |                                                                    | Poorly Characterized             | 4    | 1 |
| K06907 | K06907     |                                                                    | Poorly Characterized             | 627  | 7 |
| K06909 | K06909     |                                                                    | Poorly Characterized             | 1744 | 8 |
| K06911 | K06911     |                                                                    | Poorly Characterized             | 1    | 1 |
| K06915 | K06915     |                                                                    | Poorly Characterized             | 11   | 3 |
| K06917 | selU       | tRNA 2-selenouridine synthase [EC:2.9.1.-]                         | Poorly Characterized             | 1    | 1 |
| K06918 | K06918     |                                                                    | Poorly Characterized             | 1    | 1 |
| K06919 | K06919     | putative DNA primase/helicase                                      | Genetic Information Processing   | 716  | 8 |
| K06920 | queC       | queuosine biosynthesis protein QueC                                | Poorly Characterized             | 396  | 8 |
| K06927 | K06927     |                                                                    | Poorly Characterized             | 2    | 1 |
| K06938 | K06938     |                                                                    | Poorly Characterized             | 5    | 3 |
| K06940 | K06940     |                                                                    | Poorly Characterized             | 7    | 2 |
| K06941 | rimN       | ribosomal RNA large subunit methyltransferase N [EC:2.1.1.-]       | Translation                      | 2    | 1 |
| K06950 | K06950     | uncharacterized protein                                            | Poorly Characterized             | 1    | 1 |
| K06952 | K06952     |                                                                    | Poorly Characterized             | 1    | 1 |
| K06955 | K06955     |                                                                    | Poorly Characterized             | 1    | 1 |
| K06960 | K06960     |                                                                    | Poorly Characterized             | 1    | 1 |
| K06966 | K06966     |                                                                    | Poorly Characterized             | 2    | 2 |
| K06969 | rimi       | ribosomal RNA large subunit methyltransferase I [EC:2.1.1.-]       | Translation                      | 2    | 1 |
| K06972 | K06972     |                                                                    | Poorly Characterized             | 1    | 1 |
| K06980 | K06980     |                                                                    | Poorly Characterized             | 1    | 1 |
| K06991 | K06991     |                                                                    | Poorly Characterized             | 1    | 1 |
| K06994 | K06994     | putative drug exporter of the RND superfamily                      | Poorly Characterized             | 2    | 1 |
| K06995 | K06995     |                                                                    | Poorly Characterized             | 3    | 2 |
| K07000 | K07000     |                                                                    | Poorly Characterized             | 1    | 1 |
| K07001 | K07001     |                                                                    | Poorly Characterized             | 1    | 1 |
| K07003 | K07003     |                                                                    | Poorly Characterized             | 2    | 2 |
| K07004 | K07004     |                                                                    | Poorly Characterized             | 1    | 1 |
| K07008 | DUG3       | glutamine amidotransferase                                         | Poorly Characterized             | 12   | 2 |
| K07010 | K07010     | putative glutamine amidotransferase                                | Enzyme Families                  | 4    | 2 |
| K07011 | K07011     |                                                                    | Poorly Characterized             | 49   | 2 |
| K07012 | K07012     |                                                                    | Poorly Characterized             | 2    | 1 |
| K07019 | K07019     |                                                                    | Poorly Characterized             | 2    | 1 |
| K07024 | K07024     |                                                                    | Poorly Characterized             | 1    | 1 |
| K07031 | K07031     |                                                                    | Poorly Characterized             | 15   | 5 |
| K07033 | K07033     |                                                                    | Poorly Characterized             | 1    | 1 |
| K07043 | K07043     |                                                                    | Poorly Characterized             | 1    | 1 |
| K07044 | K07044     |                                                                    | Poorly Characterized             | 1    | 1 |
| K07052 | K07052     |                                                                    | Poorly Characterized             | 1    | 1 |
| K07053 | K07053     |                                                                    | Poorly Characterized             | 1    | 1 |
| K07056 | K07056     |                                                                    | Poorly Characterized             | 1    | 1 |
| K07058 | K07058     | membrane protein                                                   | Poorly Characterized             | 2    | 1 |
| K07067 | disA       | DNA integrity scanning protein                                     | Poorly Characterized             | 1    | 1 |
| K07071 | K07071     |                                                                    | Poorly Characterized             | 2    | 1 |
| K07074 | K07074     |                                                                    | Poorly Characterized             | 1    | 1 |
| K07088 | K07088     | PhoH-like ATPase                                                   | Poorly Characterized             | 2    | 2 |
| K07090 | K07090     |                                                                    | Poorly Characterized             | 1    | 1 |
| K07093 | K07093     |                                                                    | Poorly Characterized             | 1    | 1 |
| K07098 | K07098     |                                                                    | Poorly Characterized             | 1    | 1 |
| K07099 | K07099     |                                                                    | Poorly Characterized             | 1    | 1 |
| K07100 | K07100     |                                                                    | Poorly Characterized             | 1    | 1 |
| K07101 | K07101     |                                                                    | Poorly Characterized             | 40   | 2 |
| K07103 | K07103     |                                                                    | Poorly Characterized             | 1    | 1 |
| K07107 | ybgC       | acyl-CoA thioester hydrolase [EC:3.1.2.-]                          | Poorly Characterized             | 1    | 1 |
| K07114 | K07114     | uncharacterized protein                                            | Poorly Characterized             | 2    | 2 |
| K07117 | K07117     |                                                                    | Poorly Characterized             | 4    | 3 |
| K07124 | K07124     |                                                                    | Poorly Characterized             | 1    | 1 |
| K07126 | K07126     |                                                                    | Poorly Characterized             | 6    | 2 |
| K07130 | K07130     |                                                                    | Poorly Characterized             | 1    | 1 |
| K07137 | K07137     |                                                                    | Poorly Characterized             | 271  | 4 |
| K07154 | K07154     |                                                                    | Poorly Characterized             | 3    | 2 |
| K07156 | pocC       |                                                                    | Poorly Characterized             | 1    | 1 |
| K07168 | K07168     | CBS domain-containing membrane protein                             | Cellular Processes and Signaling | 4    | 1 |
| K07169 | K07169     | FHA domain-containing protein                                      | Cellular Processes and Signaling | 1    | 1 |
| K07175 | phoH2      | PhoH-like ATPase                                                   | Cellular Processes and Signaling | 186  | 6 |
| K07180 | pkA        | serine protein kinase                                              | Cellular Processes and Signaling | 52   | 5 |
| K07182 | K07182     | CBS domain-containing protein                                      | Cellular Processes and Signaling | 2    | 2 |
| K07219 | K07219     | putative molYbdopterin biosynthesis protein                        | Cellular Processes and Signaling | 3    | 1 |
| K07228 | K07228     | TrkA domain protein                                                | Cellular Processes and Signaling | 1    | 1 |
| K07233 | copB       | copper resistance protein B                                        | Cellular Processes and Signaling | 1    | 1 |
| K07239 | TC.HME     | heavy-metal exporter, HME family                                   | Cellular Processes and Signaling | 7    | 2 |

|        |                  |                                                                                                         |                                       |     |   |
|--------|------------------|---------------------------------------------------------------------------------------------------------|---------------------------------------|-----|---|
| K07243 | FTR1             | high-affinity iron transporter                                                                          | Cellular Processes and Signaling      | 1   | 1 |
| K07261 | mepA             | penicillin-insensitive murein endopeptidase [EC:3.4.24.-]                                               | Enzyme Families                       | 1   | 1 |
| K07262 | pbpG             | D-alanyl-D-alanine endopeptidase (penicillin-binding protein 7) [EC:3.4.99.-]                           | Enzyme Families                       | 25  | 2 |
| K07263 | pqQL             | zinc protease [EC:3.4.99.-]                                                                             | Enzyme Families                       | 4   | 1 |
| K07270 | K07270           | glycosyl transferase, family 25                                                                         | Cellular Processes and Signaling      | 21  | 3 |
| K07272 | rgpF             | ribose transferase [EC:2.4.1.-]                                                                         | Glycan Biosynthesis and Metabolism    | 1   | 1 |
| K07273 | acm              | lysosome                                                                                                | Cellular Processes and Signaling      | 2   | 1 |
| K07288 | tspA             | uncharacterized membrane protein                                                                        | Cellular Processes and Signaling      | 1   | 1 |
| K07303 | E1.3.99.16B      | isoinitronine 1-oxidoreductase, beta subunit [EC:1.3.99.16]                                             | Metabolism                            | 1   | 1 |
| K07304 | msrA             | peptide-methionine (S)-S-oxide reductase [EC:1.8.4.11]                                                  | Genetic Information Processing        | 1   | 1 |
| K07316 | mod              | adenine-specific DNA-methyltransferase [EC:2.1.1.72]                                                    | Genetic Information Processing        | 3   | 2 |
| K07317 | K07317           | adenine-specific DNA-methyltransferase [EC:2.1.1.72]                                                    | Genetic Information Processing        | 1   | 1 |
| K07319 | yhdJ             | putative adenine-specific DNA-methyltransferase [EC:2.1.1.72]                                           | Genetic Information Processing        | 780 | 9 |
| K07335 | bmpA, bmpB, tmpC | basic membrane protein A and related proteins                                                           | Cellular Processes and Signaling      | 1   | 1 |
| K07336 | K07336           | PKHD-type hydroxylase [EC:1.14.11.-]                                                                    | Metabolism                            | 34  | 6 |
| K07357 | fimB             | type 1 fimbriae regulatory protein FimB                                                                 | Genetic Information Processing        | 3   | 2 |
| K07358 | fimE             | type 1 fimbriae regulatory protein FimE                                                                 | Genetic Information Processing        | 2   | 1 |
| K07386 | pepO             | putative endopeptidase [EC:3.4.24.-]                                                                    | Enzyme Families                       | 1   | 1 |
| K07389 | cyatC, hlyC, rxC | cytolysin-activating lysine-acyltransferase [EC:2.3.1.-]                                                | Genetic Information Processing        | 5   | 1 |
| K07391 | comM             | magnesium chelatase family protein                                                                      | Genetic Information Processing        | 1   | 1 |
| K07393 | ECM4             | putative glutathione S-transferase                                                                      | Genetic Information Processing        | 1   | 1 |
| K07396 | K07396           | SM-20-related protein                                                                                   | Genetic Information Processing        | 8   | 1 |
| K07442 | TRM61, GCD14     | putative protein-disulfide isomerase                                                                    | Genetic Information Processing        | 1   | 1 |
| K07444 | ypjC             | putative N6-adenine-specific DNA methylase [EC:2.1.1.-]                                                 | Genetic Information Processing        | 1   | 1 |
| K07452 | K07452, mcrB     | 5-methylcytosine-specific restriction enzyme B [EC:3.1.21.-]                                            | Genetic Information Processing        | 1   | 1 |
| K07455 | recT             | recombination protein RecT                                                                              | Replication and Repair                | 90  | 4 |
| K07460 | yraN             | putative endonuclease                                                                                   | Genetic Information Processing        | 1   | 1 |
| K07461 | K07461           | putative endonuclease                                                                                   | Genetic Information Processing        | 7   | 3 |
| K07465 | K07465           | putative RecB family exonuclease                                                                        | Genetic Information Processing        | 3   | 2 |
| K07474 | xmA              | phage terminase small subunit                                                                           | Genetic Information Processing        | 24  | 5 |
| K07478 | ycaJ             | putative ATPase                                                                                         | Genetic Information Processing        | 34  | 4 |
| K07491 | K07491           | putative transposase                                                                                    | Genetic Information Processing        | 7   | 3 |
| K07496 | K07496           | putative transposase                                                                                    | Genetic Information Processing        | 108 | 8 |
| K07497 | K07497           | putative transposase                                                                                    | Genetic Information Processing        | 2   | 2 |
| K07501 | K07501           | hypothetical protein                                                                                    | Genetic Information Processing        | 59  | 5 |
| K07505 | K07505           | hypothetical protein                                                                                    | Genetic Information Processing        | 50  | 2 |
| K07507 | mgIC             | putative Mg2+ transporter-C (MgC) family protein                                                        | Cellular Processes and Signaling      | 2   | 2 |
| K07552 | bcr              | MFS transporter, DHA1 family, bicyclomycin/chloramphenicol resistance protein                           | Membrane Transport                    | 3   | 2 |
| K07566 | SUA5             | putative translation factor                                                                             | Translation                           | 1   | 1 |
| K07568 | queA             | S-adenosylmethionine:tRNA ribosyltransferase-isomerase [EC:5.-.-.-]                                     | Genetic Information Processing        | 1   | 1 |
| K07576 | K07576           | metallo-beta-lactamase family protein                                                                   | Genetic Information Processing        | 1   | 1 |
| K07589 | foIX             | D-erythro-7,8-dihydropterin triphosphate epimerase [EC:5.-.-.-]                                         | Metabolism                            | 1   | 1 |
| K07726 | K07726           | putative transcriptional regulator                                                                      | Transcription                         | 1   | 1 |
| K07728 | K07728           | putative transcriptional regulator                                                                      | Transcription                         | 1   | 1 |
| K07729 | K07729           | putative transcriptional regulator                                                                      | Transcription                         | 4   | 1 |
| K07738 | nrpR             | transcriptional repressor NrpR                                                                          | Transcription                         | 3   | 1 |
| K07741 | K07741           | anti-repressor protein                                                                                  | Genetic Information Processing        | 11  | 3 |
| K07749 | frc              | formyl-CoA transferase [EC:2.8.3.16]                                                                    | Metabolism                            | 1   | 1 |
| K08151 | tetA             | MFS transporter, DHA1 family, tetracycline resistance protein                                           | Membrane Transport                    | 1   | 1 |
| K08160 | cmr, mdxA        | MFS transporter, DHA1 family, multidrug/chloramphenicol efflux transport protein                        | Membrane Transport                    | 1   | 1 |
| K08223 | fsr              | MFS transporter, FSR family, fosmidomycin resistance protein                                            | Membrane Transport                    | 1   | 1 |
| K08259 | lytM             | lysozyme [EC:3.4.24.75]                                                                                 | Enzyme Families                       | 1   | 1 |
| K08282 | E2.7.11.1        | non-specific serine/threonine protein kinase [EC:2.7.11.1]                                              | Cellular Processes and Signaling      | 2   | 2 |
| K08304 | mIA              | membrane-bound lytic murein transglycosylase A [EC:3.2.1.-]                                             | Metabolism                            | 1   | 1 |
| K08307 | mID, dnrR        | membrane-bound lytic murein transglycosylase D [EC:3.2.1.-]                                             | Metabolism                            | 23  | 2 |
| K08309 | sit              | soluble lytic murein transglycosylase [EC:3.2.1.-]                                                      | Metabolism                            | 12  | 2 |
| K08482 | kaIC             | circadian clock protein KaiC                                                                            | Cellular Processes and Signaling      | 28  | 2 |
| K08602 | pepF, pepB       | oligopeptidase F [EC:3.4.24.-]                                                                          | Enzyme Families                       | 1   | 1 |
| K08884 | K08884           | serine/threonine protein kinase, bacterial [EC:2.7.11.1]                                                | Enzyme Families                       | 6   | 3 |
| K08930 | pucA             | light-harvesting protein B-800-850 alpha chain                                                          | Energy Metabolism                     | 1   | 1 |
| K08981 | K08981           | putative membrane protein                                                                               | Poorly Characterized                  | 2   | 1 |
| K08999 | K08999           | hypothetical protein                                                                                    | Poorly Characterized                  | 1   | 1 |
| K09005 | K09005           | hypothetical protein                                                                                    | Poorly Characterized                  | 15  | 4 |
| K09007 | K09007           | hypothetical protein                                                                                    | Poorly Characterized                  | 12  | 5 |
| K09013 | suFC             | Fe-S cluster assembly ATP-binding protein                                                               | Membrane Transport                    | 3   | 2 |
| K09014 | suFB             | Fe-S cluster assembly protein SuFB                                                                      | Poorly Characterized                  | 13  | 3 |
| K09117 | K09117           | hypothetical protein                                                                                    | Poorly Characterized                  | 1   | 1 |
| K09125 | K09125           | hypothetical protein                                                                                    | Poorly Characterized                  | 4   | 3 |
| K09129 | K09129           | hypothetical protein                                                                                    | Poorly Characterized                  | 1   | 1 |
| K09134 | K09134           | hypothetical protein                                                                                    | Poorly Characterized                  | 6   | 1 |
| K09136 | ycaO             | ribosomal protein S12 methyltransferase                                                                 | Translation                           | 1   | 1 |
| K09139 | K09139           | hypothetical protein                                                                                    | Poorly Characterized                  | 1   | 1 |
| K09181 | yfiQ             | hypothetical protein                                                                                    | Poorly Characterized                  | 1   | 1 |
| K09607 | ina              | immune inhibitor A [EC:3.4.24.-]                                                                        | Enzyme Families                       | 1   | 1 |
| K09728 | K09728           | hypothetical protein                                                                                    | Poorly Characterized                  | 1   | 1 |
| K09744 | K09744           | hypothetical protein                                                                                    | Poorly Characterized                  | 8   | 1 |
| K09746 | K09746           | hypothetical protein                                                                                    | Poorly Characterized                  | 2   | 1 |
| K09760 | rmuC             | DNA recombination protein RmuC                                                                          | Genetic Information Processing        | 1   | 1 |
| K09774 | lptA             | lipopolysaccharide export system protein LptA                                                           | Cellular Processes and Signaling      | 1   | 1 |
| K09776 | K09776           | hypothetical protein                                                                                    | Poorly Characterized                  | 10  | 3 |
| K09786 | K09786           | hypothetical protein                                                                                    | Poorly Characterized                  | 20  | 3 |
| K09787 | K09787           | hypothetical protein                                                                                    | Poorly Characterized                  | 1   | 1 |
| K09790 | K09790           | hypothetical protein                                                                                    | Poorly Characterized                  | 4   | 2 |
| K09791 | K09791           | hypothetical protein                                                                                    | Poorly Characterized                  | 1   | 1 |
| K09818 | ABC.MN.S         | manganese/iron transport system substrate-binding protein                                               | Membrane Transport                    | 1   | 1 |
| K09861 | K09861           | hypothetical protein                                                                                    | Poorly Characterized                  | 2   | 1 |
| K09892 | K09892           | hypothetical protein                                                                                    | Poorly Characterized                  | 3   | 1 |
| K09935 | K09935           | hypothetical protein                                                                                    | Poorly Characterized                  | 3   | 1 |
| K09946 | K09946           | hypothetical protein                                                                                    | Poorly Characterized                  | 1   | 1 |
| K09955 | K09955           | hypothetical protein                                                                                    | Poorly Characterized                  | 2   | 1 |
| K09960 | K09960           | hypothetical protein                                                                                    | Poorly Characterized                  | 54  | 4 |
| K09961 | K09961           | hypothetical protein                                                                                    | Poorly Characterized                  | 26  | 2 |
| K09966 | K09966           | hypothetical protein                                                                                    | Poorly Characterized                  | 5   | 2 |
| K09968 | K09968           | hypothetical protein                                                                                    | Poorly Characterized                  | 2   | 2 |
| K09973 | K09973           | hypothetical protein                                                                                    | Poorly Characterized                  | 1   | 1 |
| K10026 | queE, ykV, ygcF  | queuosine biosynthesis protein QueE                                                                     | Poorly Characterized                  | 125 | 5 |
| K10704 | UBE2V            | ubiquitin-conjugating enzyme E2 variant                                                                 | Replication and Repair                | 1   | 1 |
| K10726 | mcm, cdc21       | replicative DNA helicase Mcm [EC:3.6.4.-]                                                               | Replication and Repair                | 22  | 3 |
| K10819 | E2.7.13.3        | histidine kinase                                                                                        | Metabolism                            | 1   | 1 |
| K10896 | FANCM            | fanconi anemia group M protein [EC:3.6.4.13]                                                            | Replication and Repair                | 2   | 1 |
| K10906 | recE             | exodeoxyribonuclease VIII [EC:3.1.11.-]                                                                 | Replication and Repair                | 33  | 2 |
| K10908 | POLRMT, RPO41    | DNA-directed RNA polymerase, mitochondrial [EC:2.7.7.6]                                                 | Genetic Information Processing        | 36  | 4 |
| K11068 | hlyIII           | hemolysin III                                                                                           | Signaling Molecules and Interaction   | 5   | 2 |
| K11107 | yfaE             | ferredoxin                                                                                              | Metabolism                            | 9   | 4 |
| K11159 | K11159           | carotenoid cleavage dioxygenase                                                                         | Metabolism                            | 1   | 1 |
| K11527 | K11527           | two-component system, unclassified family, sensor histidine kinase and response regulator [EC:2.7.13.3] | Signal Transduction - Enzyme Families | 2   | 1 |
| K11895 | impH, vasB       | type VI secretion system protein ImpH                                                                   | Membrane Transport                    | 2   | 1 |
| K11900 | impC             | type VI secretion system protein ImpC                                                                   | Membrane Transport                    | 1   | 1 |
| K12065 | traB             | conjugal transfer pilus assembly protein TraB                                                           | Membrane Transport                    | 1   | 1 |
| K12287 | mshQ             | MSHA biogenesis protein MshQ                                                                            | Membrane Transport                    | 1   | 1 |
| K12507 | fadK             | acyl-CoA synthetase [EC:6.2.1.-]                                                                        | Lipid Metabolism                      | 1   | 1 |

|        |                         |                                                                              |                                                            |     |   |
|--------|-------------------------|------------------------------------------------------------------------------|------------------------------------------------------------|-----|---|
| K12684 | K12684, sigA, sepA, esp | serine protease autotransporter [EC:3.4.21.-]                                | Membrane Transport                                         | 3   | 1 |
| K12685 | ssp                     | subtilase-type serine protease [EC:3.4.21.-]                                 | Membrane Transport                                         | 1   | 1 |
| K12950 | ctpC                    | cation-transporting P-type ATPase C [EC:3.6.3.-]                             | Metabolism                                                 | 1   | 1 |
| K12979 | lpxO                    | beta-hydroxylase [EC:1.14.11.-]                                              | Glycan Biosynthesis and Metabolism                         | 2   | 2 |
| K12989 | lpxC                    | mannosyltransferase [EC:2.4.1.-]                                             | Glycan Biosynthesis and Metabolism                         | 1   | 1 |
| K12997 | rgpB                    | rhmannosyltransferase [EC:2.4.1.-]                                           | Glycan Biosynthesis and Metabolism                         | 1   | 1 |
| K13005 | rtbV                    | abequosyltransferase [EC:2.4.1.-]                                            | Glycan Biosynthesis and Metabolism                         | 1   | 1 |
| K13010 | per                     | perosamine synthetase                                                        | Glycan Biosynthesis and Metabolism - Amino Acid Metabolism | 14  | 4 |
| K13013 | wbqV                    | O-antigen biosynthesis protein WbqV                                          | Glycan Biosynthesis and Metabolism                         | 4   | 3 |
| K13016 | wbpB                    | UDP-D-GlcNAcA oxidase [EC:1.1.1.-]                                           | Glycan Biosynthesis and Metabolism                         | 8   | 2 |
| K13018 | wbpD                    | UDP-D-GlcNAc3NA acetyltransferase [EC:2.3.1.-]                               | Glycan Biosynthesis and Metabolism                         | 1   | 1 |
| K13019 | wbpI                    | UDP-GlcNAc3NA epimerase [EC:5.1.3.23]                                        | Glycan Biosynthesis and Metabolism                         | 6   | 3 |
| K13020 | wbA, bplA               | UDP-D-GlcNAcA oxidase [EC:1.1.1.-]                                           | Glycan Biosynthesis and Metabolism                         | 2   | 2 |
| K13057 | treT                    | trehalose synthase [EC:2.4.1.245]                                            | Metabolism                                                 | 3   | 2 |
| K13275 | isp                     | major intracellular serine protease [EC:3.4.21.-]                            | Folding, Sorting and Degradation - Enzyme Families         | 1   | 1 |
| K13281 | uvrE, UVE1              | UV DNA damage endonuclease [EC:3.-.-.-]                                      | Genetic Information Processing                             | 103 | 5 |
| K13611 | pkxJ                    | polyketide synthase PksJ                                                     | Lipid Metabolism                                           | 11  | 1 |
| K13628 | iscA                    | iron-sulfur cluster assembly protein                                         | Metabolism                                                 | 54  | 3 |
| K13635 | cbI                     | LysR family transcriptional regulator, cys regulon transcriptional activator | Transcription                                              | 1   | 1 |
| K13678 | cpoA                    | monoglucosylacylglycerol glycosyltransferase [EC:2.4.1.-]                    | Glycan Biosynthesis and Metabolism                         | 5   | 2 |
| K13693 | K13693                  | glucosyl-3-phosphoglycerate synthase [EC:2.4.1.-]                            | Glycan Biosynthesis and Metabolism                         | 1   | 1 |
| K13694 | spr                     | lipoprotein Spr                                                              | Enzyme Families                                            | 7   | 2 |
| K13695 | nlpC                    | probable lipoprotein NlpC                                                    | Enzyme Families                                            | 8   | 2 |
| K13819 | K13819                  | NifU-like protein                                                            | Metabolism                                                 | 2   | 1 |
| K13930 | mdcB                    | triphosphoribosyl-dephospho-CoA synthase [EC:2.7.8.25]                       | Metabolism                                                 | 1   | 1 |
| K14059 | int                     | integrase                                                                    | Genetic Information Processing                             | 17  | 1 |
| K14060 | pinR                    | putative DNA-invertase from lambdoid prophage Rac                            | Genetic Information Processing                             | 1   | 1 |
| K14162 | dnaE2                   | error-prone DNA polymerase [EC:2.7.7.7]                                      | Replication and Repair                                     | 3   | 2 |
| K14266 | prnA                    | FADH2 O2-dependent halogenase I [EC:1.14.14.7]                               | Metabolism                                                 | 25  | 4 |
| K14287 | ybdL                    | methionine aminotransferase [EC:2.6.1.-]                                     | Amino Acid Metabolism                                      | 1   | 1 |
| K14393 | actP                    | cation/acetate symporter                                                     | Cellular Processes and Signaling                           | 1   | 1 |
| K14415 | rtcB                    | protein RtcB                                                                 | Poorly Characterized                                       | 1   | 1 |
| K14441 | rimO                    | ribosomal protein S12 methyltransferase [EC:2.-.-.-]                         | Translation                                                | 1   | 1 |
| K14623 | dinD                    | DNA-damage-inducible protein D                                               | Poorly Characterized                                       | 42  | 1 |
| K14645 | K14645                  | serine protease [EC:3.4.21.-]                                                | Folding, Sorting and Degradation - Enzyme Families         | 3   | 1 |
| K14660 | nodE                    | nodulation protein E [EC:2.3.1.-]                                            | Cellular Processes and Signaling                           | 1   | 1 |
| K14665 | amhX                    | amidohydrolase [EC:3.5.1.-]                                                  | Enzyme Families                                            | 1   | 1 |
| K14680 | E6.5.1.3                | RNA ligase [EC:6.5.1.3]                                                      | Metabolism                                                 | 72  | 3 |
| K14744 | rzpD                    | putative Rz endopeptidase from lambdoid prophage DLP12 [EC:3.4.-.-]          | Poorly Characterized                                       | 8   | 2 |
